# Supplementary material
Source: PubMed Central journal article supplement (PMC3690854)
Supplement: 1222447110_pnas.201222447SI.pdf [file 1222447110_pnas.201222447SI.pdf]

# Supporting Information

Cacioppo et al. 10.1073/pnas.1222447110

**Table S1. Demographic characteristics for unweighted sample, weighted sample for marriages between 2005 and 2012, and the general United States married population across all years**

| Demographic                 | Sample characteristics |               | General United States married population estimates (%) |
|-----------------------------|------------------------|---------------|--------------------------------------------------------|
|                             | Unweighted             | Weighted      |                                                        |
| <i>n</i>                    | 19,131                 | 19,038        |                                                        |
| Percent female              | 62.96                  | 52.70         | 50.00                                                  |
| Age (y)                     |                        |               |                                                        |
| Mean                        | 34.31 (10.69)          | 37.83 (11.77) |                                                        |
| 18–29                       | 39.97%                 | 24.66%        | 8.62                                                   |
| 30–39                       | 34.96%                 | 38.20%        | 19.08                                                  |
| 40–49                       | 14.17%                 | 20.37%        | 22.55                                                  |
| 50–64                       | 9.46%                  | 13.37%        | 31.82                                                  |
| 65+                         | 1.45%                  | 3.39%         | 17.92                                                  |
| Ethnicity                   |                        |               |                                                        |
| White/Caucasian             | 74.49%                 | 67.83%        | 79.98                                                  |
| Black/African American      | 5.73%                  | 8.56%         | 7.20                                                   |
| Hispanic                    | 10.34%                 | 18.29%        | 12.82                                                  |
| Asian or Pacific Islander   | 5.28%                  | 2.77%         |                                                        |
| Other                       | 2.78%                  | 1.39%         |                                                        |
| Income                      |                        |               |                                                        |
| Less than \$15,000          | 4.91%                  | 3.68%         | 4.30                                                   |
| \$15,000 to \$24,999        | 8.58%                  | 6.35%         | 6.60                                                   |
| \$25,000 to \$34,999        | 11.03%                 | 7.88%         | 8.40                                                   |
| \$35,000 to \$49,999        | 16.55%                 | 12.12%        | 12.60                                                  |
| \$50,000 to \$74,999        | 22.13%                 | 19.68%        | 20.00                                                  |
| \$75,000 to \$99,999        | 15.13%                 | 14.85%        | 15.80                                                  |
| More than \$99,999          | 16.77%                 | 31.16%        | 32.30                                                  |
| Education                   |                        |               |                                                        |
| High school or less         | 15.78%                 | 23.66%        | 40.40                                                  |
| Associates or job training  | 15.35%                 | 17.56%        | 9.70                                                   |
| College                     | 50.05%                 | 45.77%        | 37.20                                                  |
| Graduate school             | 18.82%                 | 13.02%        | 12.70                                                  |
| Religious affiliation       |                        |               |                                                        |
| Catholic                    | 19.70%                 | 23.56%        |                                                        |
| Christian/Protestant        | 39.81%                 | 38.26%        |                                                        |
| Jewish                      | 2.24%                  | 2.84%         |                                                        |
| Mormon                      | 2.81%                  | 2.09%         |                                                        |
| Spiritual, but unaffiliated | 14.88%                 | 14.84%        |                                                        |
| Atheist/no religion         | 10.90%                 | 9.84%         |                                                        |
| Other religion              | 9.67%                  | 8.57%         |                                                        |
| Employment status           |                        |               |                                                        |
| Used full or part time      | 71.72%                 | 75.04%        | 63.00                                                  |
| Retired                     | 4.18%                  | 6.59%         |                                                        |
| Student                     | 11.87%                 | 8.53%         |                                                        |
| Stay at home parent         | 28.81%                 | 23.80%        |                                                        |

Harris Interactive applied weights to increase the representativeness of the survey data to the United States population of couples married (*Methods*). Estimates for the general United States married population were derived from the March 2011 US Census Current Population Survey. For Ethnicity in the 2011 US Census Current Population Survey, White/Caucasian included all races except Black/African American and Hispanic. Small percentages of participants did not report ethnicity (1.2%) or Income (4.3%) so column totals do not add to 100%. For Employment Status in the 2011 US Census Current Population Survey, estimates did not include reports of retired, student, or stay at home parents.



Table S2. Cont.

| Demographic         | On-line sources   |        |           |                  |                |               |                  |                   |                 |                 |                | Significance test |                        |
|---------------------|-------------------|--------|-----------|------------------|----------------|---------------|------------------|-------------------|-----------------|-----------------|----------------|-------------------|------------------------|
|                     | Instant messaging | e-mail | Chat room | Discussion group | Social network | Virtual world | Multiplayer game | On-line community | Message on blog | Other (on-line) | On-line dating |                   | Total                  |
| Retired             | 3.11%             | 18.44% | 6.22%     | 2.20%            | 1.48%          | 4.62%         | 4.40%            | 5.74%             | 5.60%           | 14.26%          | 8.01%          | 6.13%             | $\chi^2(10) = 57.65^*$ |
| Student             | 6.97%             | 7.73%  | 8.78%     | 6.55%            | 11.36%         | 18.91%        | 6.42%            | 7.81%             | 6.23%           | 8.84%           | 6.58%          | 8.21%             | $\chi^2(10) = 25.9$    |
| Stay at home parent | 22.79%            | 23.21% | 18.77%    | 19.53%           | 22.47%         | 17.86%        | 16.13%           | 17.42%            | 18.11%          | 26.78%          | 15.83%         | 18.50%            | $\chi^2(10) = 21.73$   |

The percentages in each cell represent the percentage of participants from each venue of meeting represented in the specified demographic category. The omnibus  $\chi^2$  were conducted across on-line, off-line, and on-line dating sources separately. Small percentages of participants did not report ethnicity (1.2%) or income (4.3%) so column totals do not add to 100%. The  $\chi^2$  tests were done using a Rao-Scott correction to account for weighting the sample. Because individuals could select multiple employment categories,  $\chi^2$  tests were done for each employment status individually. Because of the large number of unplanned comparisons, significance was set at  $*P < 0.0015$ . In the on-line comparisons for the age group 65+ there were two groups (discussion group and message on a blog) that had a zero frequency, which made a  $\chi^2$  analysis impossible. Because of this, for this comparison only, we dropped these 65+ category and conducted a  $\chi^2$  on the remaining four age categories. Thus, this test does not estimate differences among participants 65+.

**Table S3. Weighted sample demographic characteristics across different on-line dating sites**

| Demographic                       | On-line dating sites |                 |                 |                 |                 |                        | Total           | Significance test          |
|-----------------------------------|----------------------|-----------------|-----------------|-----------------|-----------------|------------------------|-----------------|----------------------------|
|                                   | eHarmony             | Match           | Plenty of Fish  | Yahoo           | Small sites     | Other (on-line dating) |                 |                            |
| Weighted <i>n</i> (marriages)     | 750                  | 729             | 171             | 216             | 738             | 392                    | 2,995           |                            |
| Percent female                    | 44.40%               | 49.95%          | 47.52%          | 51.71%          | 43.32%          | 52.08%                 | 47.21%          | $\chi^2(5) = 7.11$         |
| Age (y)                           |                      |                 |                 |                 |                 |                        |                 |                            |
| Mean (SD)                         | 36.39<br>(0.63)      | 41.78<br>(0.81) | 39.19<br>(1.48) | 40.02<br>(0.82) | 39.42<br>(0.63) | 46.37<br>(1.00)        | 40.18<br>(0.35) | $F_{(5, 2,562)} = 15.72^*$ |
| 18–29                             | 22.03%               | 12.56%          | 22.31%          | 7.81%           | 19.22%          | 9.32%                  | 16.36%          | $\chi^2(20) = 123.37^*$    |
| 30–39                             | 47.70%               | 36.56%          | 36.43%          | 51.86%          | 37.03%          | 24.28%                 | 38.96%          |                            |
| 40–49                             | 20.43%               | 27.71%          | 22.89%          | 22.02%          | 25.70%          | 27.24%                 | 24.65%          |                            |
| 50–64                             | 7.32%                | 18.51%          | 13.40%          | 18.04%          | 15.25%          | 25.94%                 | 15.56%          |                            |
| 65+                               | 2.53%                | 4.65%           | 4.97%           | 0.26%           | 2.80%           | 13.22%                 | 4.49%           |                            |
| Ethnicity                         |                      |                 |                 |                 |                 |                        |                 |                            |
| White/Caucasian                   | 66.12%               | 77.20%          | 78.90%          | 71.47%          | 62.66%          | 74.42%                 | 70.18%          | $\chi^2(20) = 76.97^*$     |
| Black/African American            | 6.17%                | 4.64%           | 5.25%           | 2.18%           | 6.79%           | 11.64%                 | 6.32%           |                            |
| Hispanic                          | 21.83%               | 12.65%          | 14.13%          | 22.28%          | 25.44%          | 7.44%                  | 18.20%          |                            |
| Asian/Pacific Islander            | 3.04%                | 3.41%           | 0.45%           | 2.25%           | 1.59%           | 3.48%                  | 2.63%           |                            |
| Other Ethnicity                   | 1.43%                | 0.89%           | 0.14%           | 1.48%           | 1.12%           | 2.10%                  | 1.24%           |                            |
| Income                            |                      |                 |                 |                 |                 |                        |                 |                            |
| Less than \$15,000                | 0.73%                | 1.28%           | 0.77%           | 0.93%           | 1.73%           | 3.39%                  | 1.47%           | $\chi^2(30) = 158.72^*$    |
| \$15,000 to \$24,999              | 1.92%                | 1.53%           | 6.80%           | 2.39%           | 3.88%           | 11.24%                 | 3.84%           |                            |
| \$25,000 to \$34,999              | 5.55%                | 2.46%           | 10.14%          | 2.89%           | 4.76%           | 7.48%                  | 4.93%           |                            |
| \$35,000 to \$49,999              | 7.49%                | 9.16%           | 16.91%          | 9.54%           | 6.56%           | 11.71%                 | 8.91%           |                            |
| \$50,000 to \$74,999              | 22.00%               | 17.59%          | 22.74%          | 18.94%          | 15.45%          | 21.97%                 | 19.13%          |                            |
| \$75,000 to \$99,999              | 23.02%               | 17.41%          | 21.03%          | 16.91%          | 14.97%          | 19.39%                 | 18.65%          |                            |
| \$100,000 or more                 | 35.51%               | 48.33%          | 18.94%          | 44.67%          | 48.78%          | 20.90%                 | 39.70%          |                            |
| Education                         |                      |                 |                 |                 |                 |                        |                 |                            |
| High school or less               | 15.07%               | 14.15%          | 21.22%          | 16.95%          | 11.67%          | 25.37%                 | 15.85%          | $\chi^2(15) = 36.98^*$     |
| Associates degree or job training | 14.15%               | 16.11%          | 12.89%          | 20.10%          | 20.04%          | 18.24%                 | 16.97%          |                            |
| Some or all college               | 50.54%               | 54.44%          | 56.83%          | 53.41%          | 50.80%          | 42.85%                 | 51.12%          |                            |
| Some or all graduate school       | 20.24%               | 15.30%          | 9.05%           | 9.54%           | 17.48%          | 13.54%                 | 16.07%          |                            |
| Religious affiliation             |                      |                 |                 |                 |                 |                        |                 |                            |
| Catholic                          | 26.09%               | 30.10%          | 21.03%          | 20.07%          | 18.42%          | 19.54%                 | 23.60%          | $\chi^2(30) = 111.91^*$    |
| Christian/Protestant              | 44.22%               | 37.58%          | 45.37%          | 45.39%          | 40.48%          | 36.15%                 | 40.80%          |                            |
| Jewish                            | 2.88%                | 1.81%           | 1.07%           | 2.34%           | 13.36%          | 2.68%                  | 5.03%           |                            |
| Mormon                            | 2.58%                | 0.44%           | 1.86%           | 3.42%           | 1.81%           | 3.39%                  | 2.00%           |                            |
| Spiritual, but unaffiliated       | 9.83%                | 14.90%          | 11.93%          | 15.23%          | 10.62%          | 18.83%                 | 12.95%          |                            |
| Atheist/no religion               | 7.22%                | 9.62%           | 10.96%          | 9.45%           | 7.96%           | 10.91%                 | 8.85%           |                            |
| Other religion                    | 7.16%                | 5.56%           | 7.77%           | 4.10%           | 7.34%           | 8.50%                  | 6.81%           |                            |
| Employment status                 |                      |                 |                 |                 |                 |                        |                 |                            |
| Used                              | 86.31%               | 81.83%          | 77.06%          | 82.30%          | 88.22%          | 70.54%                 | 82.84%          | $\chi^2(5) = 34.50^*$      |
| Retired                           | 5.02%                | 8.36%           | 7.06%           | 2.89%           | 6.77%           | 18.67%                 | 8.01%           | $\chi^2(5) = 30.27^*$      |
| Student                           | 9.16%                | 5.57%           | 9.53%           | 1.79%           | 6.71%           | 4.63%                  | 6.58%           | $\chi^2(5) = 16.44$        |
| Stay at home parent               | 14.25%               | 16.43%          | 16.15%          | 20.08%          | 15.59%          | 15.65%                 | 15.83%          | $\chi^2(5) = 2.71$         |

The percentages in each cell represent the percentage of participants from each venue of meeting represented in the specified demographic category. The omnibus  $\chi^2$  were conducted across on-line, off-line, and on-line dating sources separately. Small percentages of participants did not report ethnicity (1.2%) or Income (4.3%) so column totals do not add to 100%. The  $\chi^2$  tests were done using a Rao-Scott correction to account for weighting the sample. Because individuals could select multiple employment categories,  $\chi^2$  tests were done for each employment status individually. Because of the large number of unplanned comparisons, significance was set at  $*P < 0.0015$ . In the on-line comparisons for the age group 65+ there were two groups (discussion group and message on a blog) that had a zero frequency which made a  $\chi^2$  analysis impossible. Because of this, for this comparison only, we dropped these 65+ category and conducted a  $\chi^2$  on the remaining four age categories. Thus, this test does not estimate differences among participants 65+.



Table S4. Cont.

Off-line Sources

| Demographic         | Work   | Friends | School | Family | Bar/club | Place of worship | Social gathering | Grew up together | Blind date | Other (off-line) | Total  | Significance test     |
|---------------------|--------|---------|--------|--------|----------|------------------|------------------|------------------|------------|------------------|--------|-----------------------|
| Retired             | 6.88%  | 5.44%   | 2.86%  | 5.57%  | 6.79%    | 6.99%            | 7.29%            | 7.29%            | 10.67%     | 13.92%           | 6.84%  | $\chi^2(9) = 49.84^*$ |
| Student             | 6.73%  | 7.16%   | 12.36% | 8.10%  | 8.23%    | 10.04%           | 10.36%           | 13.62%           | 6.38%      | 7.14%            | 8.70%  | $\chi^2(9) = 53.60^*$ |
| Stay at home parent | 24.45% | 27.44%  | 27.56% | 31.02% | 24.64%   | 34.46%           | 24.85%           | 26.65%           | 25.88%     | 26.40%           | 26.64% | $\chi^2(9) = 21.24$   |

The percentages in each cell represent the percentage of participants from each venue of meeting represented in the specified demographic category. The omnibus  $\chi^2$  were conducted across on-line, off-line, and on-line dating sources separately. Small percentages of participants did not report ethnicity (1.2%) or Income (4.3%), so column totals do not add to 100%. The  $\chi^2$  tests were done using a Rao-Scott correction to account for weighting the sample. Because individuals could select multiple employment categories,  $\chi^2$  tests were done for each employment status individually. Because of the large number of unplanned comparisons, significance was set at  $*P < 0.0015$ . In the on-line comparisons for the age group 65+, there were two groups (discussion group and message on a blog) that had a zero frequency which made a  $\chi^2$  analysis impossible. Because of this, for this comparison only, we dropped these 65+ category and conducted a  $\chi^2$  on the remaining four age categories. Thus, this test does not estimate differences among participants 65+.

**Table S5. Mean differences in rates of marital break-ups across different on-line and off-line meeting venues**

| Meeting source              | Weighted <i>n</i> (marriages) | % Marital break-up |
|-----------------------------|-------------------------------|--------------------|
| <b>On-line sources</b>      |                               |                    |
| Instant messaging           | 309                           | 9.46               |
| E-mail                      | 136                           | 2.11               |
| Chat room                   | 633                           | 4.44               |
| Discussion group            | 126                           | 9.50               |
| Social network              | 1,389                         | 6.02               |
| Virtual world               | 142                           | 11.81              |
| Multiplayer game            | 239                           | 5.49               |
| On-line community           | 411                           | 3.66               |
| Message on blog             | 106                           | 3.53               |
| On-line dating              | 2,995                         | 6.13               |
| Other                       | 167                           | 5.16               |
| <b>On-line dating sites</b> |                               |                    |
| eHarmony                    | 750                           | 3.86               |
| Match                       | 729                           | 7.98               |
| Plenty of Fish              | 171                           | 11.46              |
| Yahoo                       | 216                           | 5.75               |
| Small sites                 | 738                           | 4.95               |
| Other                       | 392                           | 7.15               |
| <b>Off-line sources</b>     |                               |                    |
| Work                        | 2,682                         | 7.50               |
| Friends                     | 2,360                         | 9.00               |
| School                      | 1,359                         | 5.83               |
| Family                      | 838                           | 7.47               |
| Bar/club                    | 1,081                         | 7.31               |
| Place of worship            | 506                           | 7.55               |
| Social gathering            | 1,237                         | 8.21               |
| Grew up together            | 937                           | 6.28               |
| Blind date                  | 330                           | 7.07               |
| Other                       | 1,054                         | 8.89               |

**Table S6. Mean differences in rates of marital break-ups across different on-line and off-line meeting venues: Marriage as the unit of analysis**

| Meeting source              | Weighted <i>n</i> (marriages) | % Marital break-up |
|-----------------------------|-------------------------------|--------------------|
| <b>On-line sources</b>      |                               |                    |
| Instant messaging           | 343                           | 8.53               |
| E-mail                      | 144                           | 1.98               |
| Chat room                   | 664                           | 4.23               |
| Discussion group            | 138                           | 8.69               |
| Social network              | 1,544                         | 5.42               |
| Virtual world               | 156                           | 10.77              |
| Multiplayer game            | 257                           | 5.09               |
| On-line community           | 428                           | 3.52               |
| Message on blog             | 109                           | 3.42               |
| On-line dating              | 3,188                         | 5.76               |
| Other                       | 190                           | 4.53               |
| $\chi^2$ ( <i>df</i> )      |                               | 15.33 (10)         |
| <b>On-line dating sites</b> |                               |                    |
| eHarmony                    | 791                           | 3.66               |
| Match                       | 775                           | 7.50               |
| Plenty of Fish              | 201                           | 9.75               |
| Yahoo                       | 227                           | 5.48               |
| Small sites                 | 777                           | 4.70               |
| Other                       | 417                           | 6.70               |
| $\chi^2$ ( <i>df</i> )      |                               | 9.38 (5)           |
| <b>Off-line sources</b>     |                               |                    |
| Work                        | 2,858                         | 7.04               |
| Friends                     | 2,503                         | 8.49               |
| School                      | 1,410                         | 5.61               |
| Family                      | 899                           | 6.96               |
| Bar/club                    | 1,190                         | 6.64               |
| Place of worship            | 546                           | 6.99               |
| Social gathering            | 1,333                         | 7.62               |
| Grew up together            | 1,015                         | 5.80               |
| Blind date                  | 363                           | 6.42               |
| Other                       | 1,118                         | 8.38               |
| $\chi^2$ ( <i>df</i> )      |                               | 10.07 (9)          |
| On-line                     | 7,051                         | 5.87               |
| Off-line                    | 12,998                        | 7.73               |
| $\chi^2$ ( <i>df</i> )      |                               | 10.48 (1)*         |

\* $P < 0.01$ . Named on-line dating sites are placed in alphabetical order. "Small sites" in the on-line dating category were named but did not produce more than 100 marriages.



**Table S7. Mean differences in marital satisfaction across different on-line and off-line meeting venues: Marriage as the unit of analysis**

| Meeting source                 | Weighted <i>n</i> | Marital satisfaction |
|--------------------------------|-------------------|----------------------|
| On-line sources                |                   |                      |
| Instant messaging              | 295               | 5.68 <sup>a</sup>    |
| E-mail                         | 139               | 5.57 <sup>abc</sup>  |
| Chat room                      | 614               | 5.42 <sup>bc</sup>   |
| Discussion group               | 120               | 5.59 <sup>ab</sup>   |
| Social network                 | 1,396             | 5.69 <sup>a</sup>    |
| Virtual world                  | 136               | 5.70 <sup>a</sup>    |
| Multiplayer game               | 229               | 5.74 <sup>a</sup>    |
| On-line community              | 400               | 5.30 <sup>c</sup>    |
| Message on blog                | 103               | 5.60 <sup>ab</sup>   |
| On-line dating                 | 2,893             | 5.69 <sup>a</sup>    |
| Other (on-line)                | 175               | 5.43 <sup>abc</sup>  |
| Significance test <i>F(df)</i> |                   | 4.02 (10, 5,611)*    |
| On-line dating sites           |                   |                      |
| eHarmony                       | 737               | 5.86 <sup>a</sup>    |
| Match                          | 693               | 5.71 <sup>b</sup>    |
| Plenty of Fish                 | 167               | 5.65 <sup>ab</sup>   |
| Yahoo                          | 205               | 5.30 <sup>c</sup>    |
| Small sites                    | 712               | 5.71 <sup>b</sup>    |
| Other (on-line dating)         | 379               | 5.54 <sup>bc</sup>   |
| Significance test <i>F(df)</i> |                   | 6.32 (5, 2,489)*     |
| Off-line sources               |                   |                      |
| Work                           | 2,581             | 5.39 <sup>e</sup>    |
| Friends                        | 2,199             | 5.47 <sup>ce</sup>   |
| School                         | 1,297             | 5.59 <sup>ab</sup>   |
| Family                         | 820               | 5.42 <sup>ce</sup>   |
| Bar/club                       | 1,045             | 5.35 <sup>e</sup>    |
| Place of worship               | 490               | 5.53 <sup>acd</sup>  |
| Social gathering               | 1,182             | 5.54 <sup>bc</sup>   |
| Grew up together               | 911               | 5.68 <sup>a</sup>    |
| Blind date                     | 316               | 5.31 <sup>de</sup>   |
| Other (off-line)               | 988               | 5.42 <sup>ce</sup>   |
| Significance test <i>F(df)</i> |                   | 5.79 (9, 12,663)*    |
| On-line                        | 6,501             | 5.63                 |
| Off-line                       | 11,827            | 5.47                 |
| Significance test <i>F(df)</i> |                   | 47.71 (1, 18,275)*   |

\* $P < 0.001$ . Post hoc analyses are expressed in superscripts and were done using least-significant differences tests. Means within a row that do not share a superscript differ at  $P < 0.05$ .

**Table S8. Weighted sample demographic characteristics across different on-line meeting venues: Marriage as the unit of analysis**

| Demographic                       | On-line Sources   |              |              |                  |                |               |                  |                   |                 |                 |                |              | Significance test        |
|-----------------------------------|-------------------|--------------|--------------|------------------|----------------|---------------|------------------|-------------------|-----------------|-----------------|----------------|--------------|--------------------------|
|                                   | Instant messaging | e-Mail       | Chat room    | Discussion group | Social network | Virtual world | Multiplayer Game | On-line community | Message on blog | Other (on-line) | On-line dating | Total        |                          |
| Weighted <i>n</i> (marriages)     | 343               | 144          | 664          | 138              | 1544           | 156           | 257              | 428               | 109             | 190             | 3188           | 7,163        |                          |
| Percent female                    | 46.78             | 38.76        | 40.78        | 44.90            | 45.33          | 55.12         | 42.23            | 31.47             | 32.22           | 49.38           | 47.06          | 44.82        | $\chi^2(10) = 28.38$     |
| Mean (SD)                         | 36.13 (0.77)      | 42.87 (2.32) | 38.55 (0.59) | 38.12 (1.06)     | 34.13 (0.39)   | 34.45 (1.28)  | 35.76 (0.87)     | 36.72 (0.71)      | 36.79 (1.37)    | 43.72 (2.09)    | 40.28 (0.34)   | 38.14 (0.22) | $F(10, 6,130) = 17.19^*$ |
| 18-29                             | 26.14%            | 15.80%       | 17.16%       | 12.46%           | 31.74%         | 35.03%        | 29.49%           | 17.99%            | 14.23%          | 18.69%          | 16.24%         | 21.08%       |                          |
| 30-39                             | 43.32%            | 29.60%       | 38.81%       | 44.72%           | 42.32%         | 31.73%        | 40.40%           | 51.04%            | 50.42%          | 21.84%          | 38.05%         | 39.72%       |                          |
| 40-49                             | 15.95%            | 27.60%       | 27.92%       | 30.07%           | 17.78%         | 25.86%        | 18.19%           | 18.79%            | 25.95%          | 24.36%          | 23.88%         | 22.34%       |                          |
| 50-64                             | 10.71%            | 20.86%       | 13.85%       | 9.51%            | 5.21%          | 5.71%         | 8.15%            | 9.34%             | 8.11%           | 21.69%          | 15.73%         | 12.20%       |                          |
| 65+                               | 1.68%             | 6.14%        | 1.20%        | 0.00%            | 1.07%          | 1.67%         | 2.10%            | 1.81%             | 0.00%           | 10.18%          | 4.64%          | 3.10%        |                          |
| Ethnicity                         |                   |              |              |                  |                |               |                  |                   |                 |                 |                |              |                          |
| White/Caucasian                   | 58.51%            | 62.63%       | 53.64%       | 72.98%           | 59.13%         | 62.97%        | 57.44%           | 50.35%            | 60.69%          | 57.28%          | 69.32%         | 62.93%       | $\chi^2(40) = 185.84^*$  |
| Black/African American            | 1.79%             | 0.78%        | 5.80%        | 0.40%            | 9.25%          | 8.70%         | 2.59%            | 5.43%             | 4.09%           | 10.01%          | 5.96%          | 6.23%        |                          |
| Hispanic                          | 30.11%            | 29.42%       | 35.58%       | 17.61%           | 25.79%         | 23.87%        | 34.30%           | 37.21%            | 29.75%          | 21.09%          | 18.00%         | 24.24%       |                          |
| Asian/Pacific Islander            | 4.33%             | 4.97%        | 2.53%        | 3.76%            | 2.29%          | 1.24%         | 0.28%            | 4.51%             | 2.29%           | 2.77%           | 2.57%          | 2.67%        |                          |
| Other ethnicity                   | 2.57%             | 1.87%        | 0.96%        | 1.53%            | 1.37%          | 1.96%         | 3.71%            | 0.58%             | 1.88%           | 2.30%           | 1.31%          | 1.46%        |                          |
| Income                            |                   |              |              |                  |                |               |                  |                   |                 |                 |                |              |                          |
| Less than \$15,000                | 3.76%             | 3.06%        | 2.57%        | 4.95%            | 3.07%          | 2.02%         | 3.25%            | 1.88%             | 2.47%           | 6.62%           | 1.65%          | 2.46%        | $\chi^2(60) = 136.48^*$  |
| \$15,000 to \$24,999              | 4.01%             | 1.28%        | 3.96%        | 1.85%            | 5.33%          | 2.72%         | 5.44%            | 2.34%             | 2.58%           | 5.70%           | 3.72%          | 4.01%        |                          |
| \$25,000 to \$34,999              | 9.59%             | 10.02%       | 9.11%        | 4.47%            | 5.93%          | 9.51%         | 7.27%            | 2.05%             | 8.25%           | 8.09%           | 5.07%          | 6.06%        |                          |
| \$35,000 to \$49,999              | 13.28%            | 4.34%        | 9.41%        | 9.39%            | 11.46%         | 10.24%        | 7.87%            | 9.30%             | 14.35%          | 7.69%           | 8.92%          | 9.70%        |                          |
| \$50,000 to \$74,999              | 19.38%            | 25.96%       | 17.07%       | 15.71%           | 19.01%         | 18.60%        | 12.30%           | 12.76%            | 7.38%           | 18.63%          | 19.09%         | 18.15%       |                          |
| \$75,000 to \$99,999              | 12.22%            | 11.95%       | 13.91%       | 16.25%           | 15.37%         | 8.44%         | 10.86%           | 16.93%            | 10.41%          | 17.24%          | 18.30%         | 16.08%       |                          |
| \$100,000 or more                 | 33.14%            | 43.05%       | 41.51%       | 42.34%           | 35.68%         | 45.04%        | 48.90%           | 50.86%            | 53.27%          | 24.38%          | 38.43%         | 39.15%       |                          |
| Education                         |                   |              |              |                  |                |               |                  |                   |                 |                 |                |              |                          |
| High school or less               | 20.69%            | 36.44%       | 20.05%       | 14.17%           | 21.94%         | 21.49%        | 16.71%           | 12.14%            | 12.96%          | 27.73%          | 15.65%         | 18.27%       | $\chi^2(30) = 73.17^*$   |
| Associates degree or job training | 14.03%            | 18.02%       | 23.98%       | 20.84%           | 17.28%         | 25.65%        | 15.31%           | 14.51%            | 15.79%          | 21.48%          | 17.04%         | 17.76%       |                          |
| Some or all college               | 50.06%            | 34.95%       | 42.53%       | 44.22%           | 45.02%         | 42.94%        | 52.21%           | 59.03%            | 56.27%          | 37.98%          | 50.09%         | 48.11%       |                          |
| Some or all graduate school       | 13.01%            | 10.59%       | 12.37%       | 17.54%           | 13.87%         | 9.92%         | 14.09%           | 13.30%            | 13.69%          | 9.56%           | 15.72%         | 14.28%       |                          |
| Religious affiliation             |                   |              |              |                  |                |               |                  |                   |                 |                 |                |              |                          |
| Catholic                          | 24.12%            | 31.70%       | 24.34%       | 27.71%           | 22.09%         | 17.06%        | 26.17%           | 21.01%            | 14.71%          | 26.88%          | 22.98%         | 23.08%       | $\chi^2(60) = 137.78$    |
| Christian/Protestant              | 40.45%            | 35.01%       | 38.08%       | 31.93%           | 39.27%         | 35.42%        | 38.24%           | 35.05%            | 51.24%          | 36.44%          | 40.50%         | 39.26%       |                          |
| Jewish                            | 2.42%             | 5.77%        | 3.19%        | 2.84%            | 2.53%          | 10.16%        | 5.98%            | 6.70%             | 8.19%           | 2.11%           | 4.82%          | 4.29%        |                          |
| Mormon                            | 1.14%             | 0.66%        | 1.73%        | 3.52%            | 1.96%          | 0.71%         | 2.50%            | 4.32%             | 1.10%           | 2.42%           | 2.00%          | 2.05%        |                          |
| Spiritual, but unaffiliated       | 12.53%            | 17.15%       | 16.78%       | 11.45%           | 13.73%         | 13.01%        | 8.20%            | 16.95%            | 10.57%          | 7.20%           | 12.66%         | 13.26%       |                          |
| Atheist/no religion               | 8.17%             | 3.47%        | 5.98%        | 11.97%           | 9.00%          | 9.35%         | 10.06%           | 6.45%             | 3.65%           | 13.51%          | 8.81%          | 8.47%        |                          |
| Other religion                    | 8.97%             | 6.24%        | 8.83%        | 7.34%            | 9.54%          | 14.30%        | 7.18%            | 8.51%             | 9.24%           | 8.19%           | 6.76%          | 8.02%        |                          |
| Employment status                 |                   |              |              |                  |                |               |                  |                   |                 |                 |                |              |                          |
| Used                              | 78.64%            | 75.90%       | 81.37%       | 84.36%           | 82.38%         | 88.77%        | 81.36%           | 82.67%            | 86.23%          | 60.86%          | 81.37%         | 81.15%       | $\chi^2(10) = 32.37^*$   |

**Table S8. Cont.**

| Demographic         | On-line Sources   |        |           |                  |                |               |                  |                   |                 |                 |                | Significance test |                        |
|---------------------|-------------------|--------|-----------|------------------|----------------|---------------|------------------|-------------------|-----------------|-----------------|----------------|-------------------|------------------------|
|                     | Instant messaging | e-Mail | Chat room | Discussion group | Social network | Virtual world | Multiplayer Game | On-line community | Message on blog | Other (on-line) | On-line dating |                   | Total                  |
| Retired             | 4.93%             | 17.33% | 6.32%     | 2.64%            | 1.97%          | 5.07%         | 4.08%            | 5.52%             | 6.00%           | 17.42%          | 8.16%          | 6.42%             | $\chi^2(10) = 55.93^*$ |
| Student             | 9.19%             | 8.76%  | 8.79%     | 7.22%            | 10.91%         | 18.09%        | 6.52%            | 8.33%             | 6.05%           | 7.76%           | 6.63%          | 8.30%             | $\chi^2(10) = 23.00$   |
| Stay at home parent | 25.22%            | 22.54% | 18.60%    | 18.56%           | 23.06%         | 17.58%        | 16.75%           | 16.87%            | 18.08%          | 26.43%          | 15.57%         | 18.62%            | $\chi^2(10) = 29.88^*$ |

The percentages in each cell represent the percentage of participants from each venue of meeting represented in the specified demographic category. The omnibus  $\chi^2$  were conducted across on-line, off-line, and on-line dating sources separately. Small percentages of participants did not report ethnicity (1.2%) or income (4.3%), so column totals do not add to 100%. The  $\chi^2$  tests were done using a Rao-Scott correction to account for weighting the sample. Because individuals could select multiple employment categories,  $\chi^2$  tests were done for each employment status individually. Because of the large number of unplanned comparisons significance was set at  $*P < 0.0015$ .

**Table S9. Weighted sample demographic characteristics across different on-line dating sites: Marriage as the unit of analysis**

| Demographics                      | On-line dating sites |                 |                 |                 |                 |                        | Total           | Significance test          |
|-----------------------------------|----------------------|-----------------|-----------------|-----------------|-----------------|------------------------|-----------------|----------------------------|
|                                   | eHarmony             | Match           | Plenty of Fish  | Yahoo           | Small sites     | Other (on-line dating) |                 |                            |
| Weighted <i>n</i> (marriages)     | 791                  | 775             | 227             | 201             | 777             | 418                    | 3,188           |                            |
| Percent female                    | 43.96                | 50.07           | 52.92           | 46.81           | 43.46           | 51.04                  | 47.06           | $\chi^2(5) = 7.54$         |
| Age (y)                           |                      |                 |                 |                 |                 |                        |                 |                            |
| Mean (SD)                         | 36.47<br>(0.62)      | 41.94<br>(0.78) | 39.06<br>(1.39) | 39.86<br>(0.82) | 39.55<br>(0.62) | 46.57<br>(0.97)        | 40.28<br>(0.34) | $F_{(5, 2,702)} = 16.95^*$ |
| 18–29                             | 22.04%               | 11.96%          | 8.80%           | 21.46%          | 19.11%          | 9.34%                  | 16.24%          | $\chi^2(20) = 130.03^*$    |
| 30–39                             | 46.86%               | 35.28%          | 49.97%          | 37.61%          | 36.42%          | 23.17%                 | 38.05%          |                            |
| 40–49                             | 19.58%               | 27.62%          | 21.00%          | 20.32%          | 24.59%          | 27.03%                 | 23.88%          |                            |
| 50–64                             | 7.87%                | 18.97%          | 17.81%          | 12.17%          | 15.01%          | 26.52%                 | 15.73%          |                            |
| 65+                               | 2.62%                | 4.38%           | 0.25%           | 5.79%           | 3.38%           | 13.08%                 | 4.64%           |                            |
| Ethnicity                         |                      |                 |                 |                 |                 |                        |                 |                            |
| White/Caucasian                   | 65.38%               | 76.29%          | 70.62%          | 74.29%          | 61.84%          | 74.69%                 | 69.32%          | $\chi^2(20) = 74.18^*$     |
| Black/African American            | 5.91%                | 4.36%           | 2.08%           | 4.47%           | 6.44%           | 10.92%                 | 5.96%           |                            |
| Hispanic                          | 21.96%               | 12.19%          | 21.24%          | 15.02%          | 25.26%          | 7.45%                  | 18.00%          |                            |
| Asian/Pacific Islander            | 2.97%                | 3.39%           | 2.15%           | 0.50%           | 1.61%           | 3.27%                  | 2.57%           |                            |
| Other ethnicity                   | 1.42%                | 0.83%           | 1.41%           | 2.11%           | 1.06%           | 1.97%                  | 1.31%           |                            |
| Income                            |                      |                 |                 |                 |                 |                        |                 |                            |
| Less than \$15,000                | 1.15%                | 1.20%           | 0.89%           | 2.02%           | 1.82%           | 3.36%                  | 1.65%           | $\chi^2(30) = 148.76^*$    |
| \$15,000 to \$24,999              | 1.91%                | 1.53%           | 2.28%           | 6.11%           | 3.84%           | 10.60%                 | 3.72%           |                            |
| \$25,000 to \$34,999              | 5.32%                | 2.57%           | 3.17%           | 9.18%           | 5.13%           | 8.19%                  | 5.07%           |                            |
| \$35,000 to \$49,999              | 7.53%                | 9.13%           | 9.86%           | 16.44%          | 6.56%           | 11.41%                 | 8.92%           |                            |
| \$50,000 to \$74,999              | 21.98%               | 17.46%          | 18.65%          | 21.63%          | 15.90%          | 21.61%                 | 19.09%          |                            |
| \$75,000 to \$99,999              | 22.91%               | 17.31%          | 16.84%          | 19.06%          | 14.29%          | 19.30%                 | 18.30%          |                            |
| \$100,000 or more                 | 34.54%               | 46.67%          | 42.61%          | 20.32%          | 47.01%          | 20.83%                 | 38.43%          |                            |
| Education                         |                      |                 |                 |                 |                 |                        |                 |                            |
| High school or less               | 14.77%               | 13.54%          | 17.53%          | 23.80%          | 11.15%          | 24.65%                 | 15.65%          | $\chi^2(15) = 43.04^*$     |
| Associates degree or job training | 14.40%               | 15.94%          | 19.57%          | 11.62%          | 20.31%          | 19.26%                 | 17.04%          |                            |
| Some or all college               | 49.67%               | 53.78%          | 51.53%          | 53.92%          | 49.64%          | 42.35%                 | 50.09%          |                            |
| Some or all graduate school       | 20.13%               | 14.95%          | 9.21%           | 8.01%           | 17.41%          | 12.89%                 | 15.72%          |                            |
| Religious affiliation             |                      |                 |                 |                 |                 |                        |                 |                            |
| Catholic                          | 25.95%               | 29.23%          | 19.14%          | 18.35%          | 18.28%          | 18.80%                 | 22.98%          | $\chi^2(30) = 118.07^*$    |
| Christian/Protestant              | 44.08%               | 37.26%          | 44.48%          | 44.71%          | 39.77%          | 36.79%                 | 40.50%          |                            |
| Jewish                            | 2.93%                | 1.70%           | 2.23%           | 0.91%           | 12.88%          | 2.51%                  | 4.82%           |                            |
| Mormon                            | 2.45%                | 0.41%           | 3.26%           | 1.70%           | 1.80%           | 3.91%                  | 2.00%           |                            |
| Spiritual, but unaffiliated       | 9.38%                | 14.30%          | 15.04%          | 12.87%          | 10.40%          | 18.66%                 | 12.66%          |                            |
| Atheist/no religion               | 7.14%                | 9.31%           | 9.77%           | 10.93%          | 8.37%           | 10.34%                 | 8.81%           |                            |
| Other religion                    | 7.04%                | 6.00%           | 3.91%           | 7.87%           | 7.02%           | 8.15%                  | 6.76%           |                            |
| Employment status                 |                      |                 |                 |                 |                 |                        |                 |                            |
| Used                              | 85.45%               | 80.32%          | 80.95%          | 74.08%          | 86.42%          | 69.75%                 | 81.37%          | $\chi^2(5) = 34.52^*$      |
| Retired                           | 4.99%                | 8.24%           | 2.76%           | 7.69%           | 7.15%           | 19.02%                 | 8.16%           |                            |
| Student                           | 9.19%                | 5.24%           | 1.71%           | 11.53%          | 6.57%           | 4.74%                  | 6.63%           | $\chi^2(5) = 19.35$        |
| Stay at home parent               | 14.12%               | 15.92%          | 19.74%          | 16.64%          | 15.39%          | 15.26%                 | 15.57%          | $\chi^2(5) = 2.71$         |

The percentages in each cell represent the percentage of participants from each venue of meeting represented in the specified demographic category. The omnibus  $\chi^2$  were conducted across on-line, off-line, and on-line dating sources separately. Small percentages of participants did not report ethnicity (1.2%) or Income (4.3%), so column totals do not add to 100%. The  $\chi^2$  tests were done using a Rao-Scott correction to account for weighting the sample. Because individuals could select multiple employment categories,  $\chi^2$  tests were done for each employment status individually. Because of the large number of unplanned comparisons, significance was set at  $*P < 0.0015$ .

**Table S10. Weighted sample demographic characteristics across different off-line meeting venues: Marriage as the unit of analysis**

| Demographic                       | Off-line sources |                 |                 |                 |                 |                  |                  |                  |                 |                  | Total           | Significance test        |
|-----------------------------------|------------------|-----------------|-----------------|-----------------|-----------------|------------------|------------------|------------------|-----------------|------------------|-----------------|--------------------------|
|                                   | Work             | Friends         | School          | Family          | Bar/club        | Place of worship | Social gathering | Grew up together | Blind date      | Other (off-line) |                 |                          |
| Weighted <i>n</i> (marriages)     | 2,858            | 2,503           | 1,410           | 899             | 1,190           | 546              | 1,333            | 1,015            | 363             | 1,118            | 13,236          |                          |
| Percent female                    | 56.02            | 57.96           | 59.12           | 58.90           | 55.50           | 62.22            | 55.12            | 55.50            | 56.67           | 55.95            | 57.01           | $\chi^2(9) = 8.21$       |
| Age (y)                           |                  |                 |                 |                 |                 |                  |                  |                  |                 |                  |                 |                          |
| Mean                              | 39.18<br>(0.33)  | 37.05<br>(0.34) | 31.07<br>(0.37) | 38.18<br>(0.59) | 39.85<br>(0.50) | 38.23<br>(0.80)  | 37.55<br>(0.51)  | 36.53<br>(0.57)  | 40.05<br>(0.99) | 43.84<br>(0.60)  | 37.92<br>(0.16) | $F(9, 13,915) = 52.62^*$ |
| 18–29                             | 20.03%           | 26.10%          | 51.19%          | 23.15%          | 16.64%          | 29.71%           | 26.94%           | 30.26%           | 16.40%          | 13.45%           | 25.63%          | $\chi^2(36) = 456.24^*$  |
| 30–39                             | 37.16%           | 39.77%          | 32.51%          | 37.61%          | 36.13%          | 29.53%           | 37.24%           | 33.72%           | 35.41%          | 27.09%           | 35.62%          |                          |
| 40–49                             | 21.38%           | 17.39%          | 9.58%           | 20.42%          | 23.69%          | 18.18%           | 15.40%           | 18.45%           | 27.35%          | 26.33%           | 19.14%          |                          |
| 50–64                             | 16.99%           | 11.97%          | 3.98%           | 14.87%          | 17.42%          | 13.75%           | 14.46%           | 11.77%           | 13.92%          | 23.43%           | 14.22%          |                          |
| 65+                               | 3.00%            | 2.93%           | 1.32%           | 3.35%           | 3.29%           | 6.52%            | 3.88%            | 3.23%            | 3.72%           | 8.55%            | 3.60%           |                          |
| Ethnicity                         |                  |                 |                 |                 |                 |                  |                  |                  |                 |                  |                 |                          |
| White/Caucasian                   | 70.29%           | 72.63%          | 65.82%          | 62.28%          | 74.08%          | 65.29%           | 66.62%           | 64.21%           | 73.60%          | 66.93%           | 68.81%          | $\chi^2(36) = 176.94^*$  |
| Black/African American            | 8.83%            | 7.12%           | 8.14%           | 11.76%          | 5.85%           | 12.69%           | 12.64%           | 13.80%           | 8.21%           | 12.88%           | 9.61%           |                          |
| Hispanic                          | 15.38%           | 13.10%          | 16.75%          | 15.99%          | 13.60%          | 15.11%           | 14.40%           | 15.04%           | 7.78%           | 13.25%           | 14.45%          |                          |
| Asian/Pacific Islander            | 1.74%            | 2.81%           | 4.51%           | 7.00%           | 0.76%           | 2.32%            | 2.03%            | 1.35%            | 5.41%           | 1.78%            | 2.63%           |                          |
| Other ethnicity                   | 1.51%            | 1.57%           | 1.76%           | 1.68%           | 1.18%           | 0.96%            | 0.92%            | 1.76%            | 0.47%           | 1.48%            | 1.44%           |                          |
| Income                            |                  |                 |                 |                 |                 |                  |                  |                  |                 |                  |                 |                          |
| Less than \$15,000                | 3.06%            | 5.10%           | 5.63%           | 4.94%           | 3.23%           | 5.73%            | 3.90%            | 5.42%            | 3.90%           | 6.13%            | 4.52%           | $\chi^2(54) = 126.41^*$  |
| \$15,000 to \$24,999              | 5.92%            | 7.73%           | 7.48%           | 8.17%           | 5.67%           | 9.92%            | 9.03%            | 8.21%            | 4.63%           | 9.63%            | 7.49%           |                          |
| \$25,000 to \$34,999              | 8.68%            | 9.63%           | 8.15%           | 12.09%          | 9.11%           | 9.35%            | 7.51%            | 7.70%            | 8.30%           | 9.14%            | 8.94%           |                          |
| \$35,000 to \$49,999              | 12.98%           | 13.30%          | 11.90%          | 17.73%          | 12.38%          | 16.48%           | 14.42%           | 13.54%           | 11.83%          | 11.27%           | 13.35%          |                          |
| \$50,000 to \$74,999              | 20.64%           | 20.51%          | 20.57%          | 18.77%          | 17.41%          | 17.65%           | 19.70%           | 19.17%           | 20.77%          | 20.51%           | 19.85%          |                          |
| \$75,000 to \$99,999              | 15.10%           | 13.32%          | 14.47%          | 9.05%           | 18.50%          | 11.19%           | 14.40%           | 11.26%           | 9.84%           | 10.95%           | 13.57%          |                          |
| \$100,000 or more                 | 28.12%           | 24.06%          | 24.60%          | 23.00%          | 26.67%          | 20.72%           | 24.59%           | 26.15%           | 32.53%          | 23.96%           | 25.45%          |                          |
| Education                         |                  |                 |                 |                 |                 |                  |                  |                  |                 |                  |                 |                          |
| High school or less               | 24.72%           | 30.17%          | 17.26%          | 31.98%          | 25.74%          | 20.70%           | 25.97%           | 31.60%           | 28.67%          | 29.24%           | 26.52%          | $\chi^2(27) = 177.51^*$  |
| Associates degree or job training | 17.33%           | 16.08%          | 14.07%          | 19.77%          | 21.43%          | 17.49%           | 16.83%           | 16.16%           | 18.85%          | 20.09%           | 17.42%          |                          |
| Some or all college               | 47.10%           | 42.39%          | 45.86%          | 39.20%          | 41.89%          | 45.41%           | 43.00%           | 36.35%           | 36.28%          | 38.59%           | 42.75%          |                          |
| Some or all graduate school       | 9.40%            | 9.52%           | 21.39%          | 8.45%           | 8.11%           | 14.09%           | 12.11%           | 13.33%           | 13.01%          | 10.94%           | 11.51%          |                          |
| Religious affiliation             |                  |                 |                 |                 |                 |                  |                  |                  |                 |                  |                 |                          |
| Catholic                          | 25.58%           | 23.39%          | 21.82%          | 25.00%          | 27.61%          | 8.50%            | 22.92%           | 18.48%           | 26.26%          | 19.75%           | 22.91%          | $\chi^2(54) = 351.24^*$  |
| Christian/Protestant              | 34.78%           | 33.54%          | 37.38%          | 36.85%          | 33.68%          | 64.31%           | 35.02%           | 41.51%           | 35.48%          | 35.25%           | 36.68%          |                          |
| Jewish                            | 1.02%            | 2.54%           | 1.61%           | 1.22%           | 1.12%           | 2.29%            | 1.81%            | 2.03%            | 2.79%           | 3.80%            | 1.88%           |                          |
| Mormon                            | 1.74%            | 1.91%           | 2.91%           | 2.68%           | 0.38%           | 7.67%            | 2.72%            | 1.20%            | 1.44%           | 0.81%            | 2.05%           |                          |
| Spiritual, but unaffiliated       | 16.56%           | 16.55%          | 13.28%          | 13.29%          | 17.34%          | 2.43%            | 17.84%           | 14.71%           | 18.22%          | 16.28%           | 15.48%          |                          |
| Atheist/no religion               | 11.28%           | 11.37%          | 13.33%          | 5.59%           | 10.13%          | 1.24%            | 9.93%            | 9.81%            | 7.08%           | 11.92%           | 10.30%          |                          |
| Other religion                    | 7.60%            | 8.86%           | 8.25%           | 14.77%          | 6.90%           | 11.25%           | 7.68%            | 9.69%            | 5.55%           | 11.06%           | 8.88%           |                          |
| Employment status                 |                  |                 |                 |                 |                 |                  |                  |                  |                 |                  |                 |                          |
| Used                              | 72.18%           | 68.08%          | 73.76%          | 66.86%          | 70.26%          | 63.21%           | 72.81%           | 67.72%           | 69.15%          | 60.28%           | 69.30%          | $\chi^2(9) = 49.92^*$    |

Table S10. Cont.

Off-line sources

| Demographic         | Work   | Friends | School | Family | Bar/club | Place of worship | Social gathering | Grew up together | Blind date | Other (off-line) | Total  | Significance test     |
|---------------------|--------|---------|--------|--------|----------|------------------|------------------|------------------|------------|------------------|--------|-----------------------|
| Retired             | 6.76%  | 5.88%   | 2.76%  | 5.92%  | 6.48%    | 7.97%            | 7.44%            | 7.18%            | 9.69%      | 13.92%           | 6.92%  | $\chi^2(9) = 49.83^*$ |
| Student             | 6.92%  | 6.97%   | 12.47% | 8.11%  | 8.34%    | 9.55%            | 10.13%           | 13.53%           | 5.79%      | 6.94%            | 8.64%  | $\chi^2(9) = 57.44^*$ |
| Stay at home parent | 23.84% | 26.94%  | 27.38% | 31.57% | 24.22%   | 32.11%           | 25.26%           | 26.37%           | 24.87%     | 25.83%           | 26.24% | $\chi^2(9) = 21.30$   |

The percentages in each cell represent the percentage of participants from each venue of meeting represented in the specified demographic category. The omnibus  $\chi^2$  were conducted across on-line, off-line, and on-line dating sources separately. Small percentages of participants did not report ethnicity (1.2%) or income (4.3%), so column totals do not add to 100%. The  $\chi^2$  tests were done using a Rao-Scott correction to account for weighting the sample. Because individuals could select multiple employment categories,  $\chi^2$  tests were done for each employment status individually. Because of the large number of unplanned comparisons, significance was set at  $*P < 0.0015$ .

**Table S11. Adjusted mean differences in marital satisfaction across different on-line and off-line meeting venues**

| Meeting source         | Weighted <i>n</i> | Marital satisfaction |
|------------------------|-------------------|----------------------|
| On-line sources        |                   |                      |
| Instant messaging      | 279               | 5.60 <sup>ab</sup>   |
| E-mail                 | 133               | 5.62 <sup>ab</sup>   |
| Chat room              | 596               | 5.39 <sup>bc</sup>   |
| Discussion group       | 113               | 5.52 <sup>abc</sup>  |
| Social network         | 1,301             | 5.65 <sup>a</sup>    |
| Virtual world          | 125               | 5.61 <sup>ab</sup>   |
| Multiplayer game       | 222               | 5.68 <sup>a</sup>    |
| On-line community      | 393               | 5.26 <sup>c</sup>    |
| Message on blog        | 102               | 5.57 <sup>ab</sup>   |
| On-line dating         | 2,782             | 5.64 <sup>a</sup>    |
| Other (on-line)        | 158               | 5.52 <sup>ab</sup>   |
| On-line dating sites   |                   |                      |
| eHarmony               | 714               | 5.96 <sup>a</sup>    |
| Match                  | 663               | 5.78 <sup>b</sup>    |
| Plenty of Fish         | 151               | 5.67 <sup>bc</sup>   |
| Yahoo                  | 201               | 5.40 <sup>c</sup>    |
| Small sites            | 691               | 5.80 <sup>b</sup>    |
| Other (on-line dating) | 361               | 5.62 <sup>b</sup>    |
| Off-line sources       |                   |                      |
| Work                   | 2,474             | 5.40 <sup>d</sup>    |
| Friends                | 2,135             | 5.47 <sup>bcd</sup>  |
| School                 | 1,277             | 5.57 <sup>ab</sup>   |
| Family                 | 769               | 5.45 <sup>bcd</sup>  |
| Bar/club               | 988               | 5.41 <sup>cd</sup>   |
| Place of worship       | 466               | 5.55 <sup>ac</sup>   |
| Social gathering       | 1,133             | 5.57 <sup>ab</sup>   |
| Grew up together       | 873               | 5.66 <sup>a</sup>    |
| Blind date             | 299               | 5.30 <sup>d</sup>    |
| Other (off-line)       | 944               | 5.44 <sup>bcd</sup>  |

Post hoc analyses are expressed in superscripts and were done using least-significant differences tests. Means within a row that do not share a superscript differ at  $P < 0.05$ .

**Table S12. Adjusted mean differences in rates of marital break-ups across different on-line and off-line meeting venues**

| Meeting source              | Weighted <i>n</i> (marriages) | % Marital break-up |
|-----------------------------|-------------------------------|--------------------|
| <b>On-line sources</b>      |                               |                    |
| Instant messaging           | 309                           | 7.74               |
| E-mail                      | 136                           | 1.93               |
| Chat room                   | 633                           | 3.57               |
| Discussion group            | 126                           | 8.85               |
| Social network              | 1,389                         | 5.59               |
| Virtual world               | 142                           | 10.64              |
| Multiplayer game            | 239                           | 5.55               |
| On-line community           | 411                           | 3.28               |
| Message on blog             | 106                           | 3.58               |
| On-line dating              | 2,995                         | 5.81               |
| Other                       | 167                           | 4.12               |
| <b>On-line dating sites</b> |                               |                    |
| eHarmony                    | 750                           | 3.49               |
| Match                       | 729                           | 6.53               |
| Plenty of Fish              | 171                           | 10.18              |
| Yahoo                       | 216                           | 5.10               |
| Small sites                 | 738                           | 4.69               |
| Other                       | 392                           | 4.14               |
| <b>Off-line sources</b>     |                               |                    |
| Work                        | 2,682                         | 6.47               |
| Friends                     | 2,360                         | 7.01               |
| School                      | 1,359                         | 4.28               |
| Family                      | 838                           | 5.38               |
| Bar/club                    | 1,081                         | 5.93               |
| Place of worship            | 506                           | 5.00               |
| Social gathering            | 1,237                         | 6.51               |
| Grew up together            | 937                           | 5.13               |
| Blind date                  | 330                           | 6.74               |
| Other                       | 1,054                         | 5.77%              |

Named on-line dating sites are placed in alphabetical order. "Small sites" in the on-line dating category were named but did not produce more than 100 marriages.

## Other Supporting Information Files

[Appendix S1 \(PDF\)](#)

[Appendix S2 \(PDF\)](#)

[Dataset S1 \(XLSX\)](#)
