# Supplementary material
Source: PubMed Central journal article supplement (PMC3690854)
Supplement: 1222447110_sapp01.pdf [file 1222447110_sapp01.pdf]

## Harris Survey

### Harris Interactive Online Survey

#### HARRIS INTERACTIVE

J42050

**Title for landing page (Required for online jobs):** Welcome to our survey!

**Number of Response Equivalents (REs):** 88 Res (11 minute) – PROGRAMMING TIME  
(RESPONDENT TIME = 6 MINUTES)

**Demographics Template (Required for online jobs):** NA

---

|                                                            |
|------------------------------------------------------------|
| <b>SECTION 600: SAMPLE PRELOAD AND SCREENING QUESTIONS</b> |
|------------------------------------------------------------|

[PROGRAMMER NOTE: PLEASE COORDINATE WITH THE SAMPLE PROGRAMMER ABOUT THE PROCESSING OF ANY PRELOADED VARIABLES INDICATED IN THIS SECTION.]

**BASE: ALL RESPONDENTS**

**Q75** PRELOAD – SAMPLE SUPPLIER (QV7/ICW Field 23)

37 [NOTE: CLIENT IS PURCHASING SAMPLE FROM USAMP]  
United Sample

**BASE: ALL RESPONDENTS**

**Q5** PRELOAD – INCENTIVE ID (QV8/ICW Field 25)

[NUMERIC 5 DIGIT]  
[ ] [ ] [ ] [ ] [ ]

**BASE: ALL RESPONDENTS**

**Q23** HIDDEN QUESTION – DETERMINE CODE FROM Q5 AND Q6

- 1 HPOL/Other
- 2 Harris/Decima – Choice of Aeroplan/Draw
- 3 Harris/Decima – Choice of Aeroplan/Draw/HIpts/HIsks

**BASE: ALL RESPONDENTS**

**Q9432 Dfflag** Do you want to test DF?

[PN: Q54/1,2 show this question on screen.  
If Q54/3 fill with code 1 and don't show, if Q54/4 fill with code 2 and don't show]

- 1 Yes
- 2 No

**BASE: Q9432/1**

**Q9421 score** - Results of score  
[Hidden variable w Numeric w Total Digits=3]

[PN: will be Q9421 in the HDS]

Numeric score 0-100

**BASE: Q9432/1**

**Q9422 isnew** - results of isNew  
 [Hidden variable]

[PN: will be Q9422 in the HDS]

Returns a False if user is new returns a True if user is dup

**BASE: Q9432/1**

**Q9423 oldid** - oldid - OldId string  
 [Hidden variable]

[PN: will be Q9423 in the HDS]

Returns the local id if found

**BASE: Q9432/1**

**Q9431 isdup** - Duplicate respondent or not  
 [Hidden variable]

[PN: will be Q9431 in the HDS]

Variable to know if the respondent is a duplicate or not

[PN: Get code 1 if score/75-100 AND isnew="False" AND oldid NE Q18; Get code 3 if score=999 or isnew="error" or oldid="error"; Else get code 2]

1. Duplicate
2. Not duplicate
3. Error
4. Question not answered

[PN: If isdup NE 1 ask rest of survey if isdup=1 skip to Q59/Q60 and mark Q59=996 and Q60=5]

**Base: Q9432/1**

**Q9452 fraudscore** [hidden question]

If Fraud (q9424)=20 and sum(FPF1 through FPF6)>1 AND sum(FPF1 through FPF6)<999 then GET CODE 1

If Fraud (q9424)>20 and Fraud (q9424)<>999 GET CODE 1

IF FRAUD/999 GET CODE 3; ALL OTHER GET CODE 2

- 1 Failed - Fraud Score
- 2 Passed - Fraud Score
- 3 Error

[IF FRAUDSCORE = 1 - Terminate survey like DF Fail with q60=5 and q59=997 (Fraud Score failure)]

**BASE: ALL RESPONDENTS**

**Q148 INITIAL SURVEY MODE**

[PROGRAMMER NOTE: CAPTURE INITIAL MODE OF SURVEY]

- 1 WEB
- 2 CATI-COW

**BASE: ALL RESPONDENTS**

**Q149 FINAL SURVEY MODE**

[PROGRAMMER NOTE: CAPTURE CURRENT/FINAL MODE OF SURVEY]

- 1 WEB
- 2 CATI-COW

**BASE: ONLINE SURVEY AND (RESIDES IN DIFFERENT COUNTRY OR COUNTRY UNKNOWN)**

**Q258** [IF COUNTRY UNKNOWN (Q159/>990) INSERT <center><font size=-1>The progress bar below indicates approximately <BR>what portion of the survey you have completed.</font></center><P>]

[IF COUNTRY UNKNOWN (Q159/>990) INSERT “Thank you for agreeing to take this survey. Our first few questions will help us determine which questions to ask you.”<P>]

In which country or region do you currently reside?

[PROGRAMMER: DISPLAY CODES IN ALPHABETICAL ORDER] [DISPLAY CODE 244 AT TOP OF LIST]

[DISPLAY RESPONSES IN TWO COLUMNS GOING DOWN.]

|     |                               |                    |
|-----|-------------------------------|--------------------|
| 14  | Australia                     |                    |
| 15  | Austria                       |                    |
| 24  | Belgium                       |                    |
| 42  | Canada                        |                    |
| 60  | Denmark                       |                    |
| 76  | France                        |                    |
| 85  | Germany                       |                    |
| 89  | Greece                        |                    |
| 123 | Italy                         |                    |
| 120 | Ireland (Republic of Ireland) |                    |
| 168 | Netherlands                   |                    |
| 171 | New Zealand                   |                    |
| 179 | Norway                        |                    |
| 190 | Portugal                      |                    |
| 215 | Spain                         |                    |
| 223 | Sweden                        |                    |
| 224 | Switzerland                   |                    |
| 244 | United States of America      | [ANCHOR AT TOP]    |
| 266 | England                       |                    |
| 267 | Scotland                      |                    |
| 268 | Wales                         |                    |
| 285 | Northern Ireland              |                    |
| 996 | Other country                 | [ANCHOR AT BOTTOM] |

**BASE: ALL RESPONDENTS**

**Q260** In which country or region do you currently reside?

[SEE MASTER DEMOGRAPHIC DOCUMENT FOR CODE FRAME]

**BASE: ALL RESPONDENTS**

**Q264** [HIDDEN QUESTION – FINAL COUNTRY QUESTION FOR SURVEY LOGIC]

[IF U.K. (U.K., Scotland, Wales, England, Northern Ireland, Jersey, Isle of Man, Guernsey Island, Great Britain (Q260/266, 267, 268, 271, 285, 243, 127, 121, 105)) GET CODE 243. IF Ireland (Republic of Ireland) Q260/120 GET CODE 286] ELSE GET CODE FROM Q260.]

[SEE MASTER DEMOGRAPHIC DOCUMENT FOR CODE FRAME]

[PN: Q268 AND Q270 PRESENTED ON SAME SCREEN.]

**BASE: ONLINE SURVEY**

**Q268** Are you...?

|   |        |
|---|--------|
| 1 | Male   |
| 2 | Female |

**BASE: ONLINE SURVEY**

**Q270** In what year were you born? Please enter your response as a four-digit number (for example, 1977).

[RANGE: 1900 TO CURRENT YEAR-6]

\_\_\_\_

**BASE: ALL RESPONDENTS**

**Q280** [HIDDEN QUESTION - FINAL AGE FOR SURVEY LOGIC AND/OR QUOTAS]

[PROGRAMMER NOTE: CLIENT'S QUESTION NUMBERS WILL BE IN PARENTHESES AFTER HI QUESTION NUMBERS. THESE NUMBERS SHOULD NOT APPEAR IN THE QUESTION TEXT.]

[PN: IF US (Q264/244) AND 18+ (Q280/18+) ASK Q600; ELSE JUMP TO Q685]

**BASE: US RESPONDENTS 18 + (Q264/244 AND Q280/18+)**

**Q600 (Q1.)** What is your current marital status?

- 01 Married
- 02 Divorced
- 03 Separated
- 04 Engaged
- 05 Single (never married)
- 06 Widowed

[PN: IF NOT SINGLE/NEVER MARRIED (Q600/NOT 5), ASK Q605; ELSE JUMP TO Q685.]

**BASE: NOT SINGLE/NEVER MARRIED (Q600/NOT 5)**

**Q605 (Q1a.)** Have you gotten married since 2005 (including 2005)?

- 01 Yes
- 02 No

[PN: IF GOTTEN MARRIED SINCE 2005, ASK Q610; ELSE JUMP TO Q685.]

**BASE: GOTTEN MARRIED SINCE 2005 (Q605/1)**

**Q610 (Q1b.)** How many times have you been married since 2005 (including 2005)?

- 01 Once
- 02 More than once

**BASE: GOTTEN MARRIED SINCE 2005 (Q605/1)**

**Q615 (Q2a.)** When did you get married to your [IF MARRIED OR SEPARATED (Q600/1 OR 3), INSERT "current"; IF NOT MARRIED OR SEPARATED (Q600/NOT 1 OR 3), INSERT "most recent"] spouse?

[PRESENT DROP DOWN MENUS]

**Month:**

- 01 January
- 02 February
- 03 March
- 04 April
- 05 May
- 06 June
- 07 July
- 08 August
- 09 September
- 10 October
- 11 November
- 12 December

**Q616 Year:**

- 1 2012
- 2 2011
- 3 2010
- 4 2009
- 5 2008

6 2007  
7 2006  
8 2005

[PN: IF CURRENTLY DIVORCED AND MARRIED SINCE 2005 (Q600/2 & Q605/1) ASK Q640; ELSE JUMP TO PN BEFORE LOOP A.]

**BASE: CURRENTLY DIVORCED & MARRIED SINCE 2005 (Q600/02 & Q605/01)**

**Q640** When did you get divorced [IF MARRIED MORE THAN ONCE (Q610/2), INSERT "from your most recent spouse"]? Your best guess is fine.

[PRESENT DROP DOWN MENUS]

**Month:** 01 January  
02 February  
03 March  
04 April  
05 May  
06 June  
07 July  
08 August  
09 September  
10 October  
11 November  
12 December

**Q631 Year:** 1 2012  
2 2011  
3 2010  
4 2009  
5 2008  
6 2007  
7 2006  
8 2005

[PN: IF RESPONDENT HAS GOTTEN MARRIED ONCE SINCE 2005 (Q605/1 AND Q610/1), JUMP TO Q685; ELSE ASK LOOP SECTION.]

**[PN: BEGIN LOOP A]**

**BASE: MARRIED MORE THAN ONCE (Q610/2)**

**Q620 Q2c.** When was the most recent time you got married before [IF THIS IS THE FIRST LOOP, THEN INSERT Q615, ", ", Q616; ELSE, INSERT MONTH AND YEAR FROM PREVIOUS LOOP, SEPARATED BY A COMMA AND A SPACE]?

If you were never married before that time, please select that option under "Month."

[PRESENT DROP DOWN MENUS]

**Month:** 01 January  
02 February  
03 March  
04 April  
05 May  
06 June  
07 July  
08 August  
09 September  
10 October  
11 November  
12 December  
13 I was never married before that time.

**Q621 Year:**

|   |             |
|---|-------------|
| 1 | 2012        |
| 2 | 2011        |
| 3 | 2010        |
| 4 | 2009        |
| 5 | 2008        |
| 6 | 2007        |
| 7 | 2006        |
| 8 | 2005        |
| 9 | Before 2005 |

[PN: DO NOT ALLOW RESPONDENT TO SELECT A DATE THAT IS MORE RECENT THAN A MORE RECENT MARRIAGE FROM A PREVIOUS LOOP]

[PN: IF RESPONDENT WAS MARRIED BEFORE THE TIME FRAME OF INTEREST, OR WAS NOT MARRIED BEFORE THE TIME IN THE PREVIOUS LOOP (Q620/13 OR Q621/9), JUMP TO END OF LOOP.]

**BASE: MARRIED MORE THAN ONCE BETWEEN 2005 AND 2012 (Q610/2 AND Q621/NOT 9,10)**

**Q625** How did that marriage end?

[RANDOMIZE]

- 01 I got divorced
- 02 I was widowed

**BASE: GOT DIVORCED (Q625/1)**

**Q630** When did you get divorced? Your best guess is fine.

[PRESENT DROP DOWN MENUS]

**Month:**

|    |           |
|----|-----------|
| 01 | January   |
| 02 | February  |
| 03 | March     |
| 04 | April     |
| 05 | May       |
| 06 | June      |
| 07 | July      |
| 08 | August    |
| 09 | September |
| 10 | October   |
| 11 | November  |
| 12 | December  |

**Q631 Year:**

|   |      |
|---|------|
| 1 | 2012 |
| 2 | 2011 |
| 3 | 2010 |
| 4 | 2009 |
| 5 | 2008 |
| 6 | 2007 |
| 7 | 2006 |
| 8 | 2005 |

**[PN: IF Q620/13 OR Q621/9, END LOOP A; ELSE CONTINUE LOOP A.]**

**BASE: ALL RESPONDENTS**

**Q685** QUALIFICATION QUESTION [HIDDEN]

GET CODE 1 IF RESPONDENT:

- IS AGE 18+ (Q280/18+), AND
- IS A US RESIDENT (Q264/244), AND
- HAS GOTTEN MARRIED SINCE 2005 (Q605/1).

ELSE GET CODE 2

- 1 QUALIFIED QUOTA=20,000  
2 NOT QUALIFIED

**BASE: QUALIFIED RESPONDENTS (Q685/1)**

**Q687** QUOTA CHECK QUESTION [HIDDEN]

[CHECK QUOTA AT Q685]

- 1 Quota Cell Closed  
2 Quota Cell Open  
3 Quota Cell Not Found

**BASE: ALL RESPONDENTS**

**Q99** SCREENER QUALIFICATION IDENTIFICATION QUESTION (DOES NOT APPEAR ON SCREEN)

[PN: GET 1 IF QUALIFIED & QUOTA OPEN (Q685/1 AND Q687/2,3);  
ELSE GET CODE 6]

- 1 SCREENER QUALIFIED RESPONDENTS, QUOTA OPEN  
2 PARTIALLY SCREENER QUALIFIED, QUOTA OPEN  
3 SCREENER QUALIFIED RESPONDENTS, QUOTA CLOSED  
4 PARTIALLY SCREENER QUALIFIED RESPONDENTS, QUOTA CLOSED  
5 OVERALL QUOTA CLOSED  
6 NOT SCREENER QUALIFIED

**BASE: ALL RESPONDENTS**

**Q98** END OF SCREENER DISPOSITION STATUS OF RESPONDENT

[MULTIPLE RESPONSE]

- 1 Over quota (Q99/3)  
2 Screener Refusal #1 (INSERT DEFINITION AS QXXX/RESPONSE CHOICE)  
3 Screener Refusal #2 (INSERT DEFINITION AS QXXX/RESPONSE CHOICE)  
4 Screener Refusal #3 (INSERT DEFINITION AS QXXX/RESPONSE CHOICE)  
5 Screener Refusal #4 (INSERT DEFINITION AS QXXX/RESPONSE CHOICE)  
6 Screener Refusal #5 (INSERT DEFINITION AS QXXX/RESPONSE CHOICE)  
25 Screener Not Qualified #1 Under Age (WEB/PHONE AND UNDER AGE REQUIREMENT (Q149/1 AND Q283/1=1) OR (Q149/2 AND Q283/2=1) OR INSERT DEFINITION AS QXXX/RESPONSE CHOICE)  
26 Screener Not Qualified #2 (INSERT DEFINITION AS QXXX/RESPONSE CHOICE)  
27 Screener Not Qualified #3 (INSERT DEFINITION AS QXXX/RESPONSE CHOICE)  
28 Screener Not Qualified #4 (INSERT DEFINITION AS QXXX/RESPONSE CHOICE)  
29 Screener Not Qualified #5 (INSERT DEFINITION AS QXXX/RESPONSE CHOICE)  
99 COMPLETE (Q99/1)

**SECTION 700: MAIN QUESTIONNAIRE**

**BASE: QUALIFIED & MARRIED MORE THAN ONCE (Q99/1 AND Q610/2)**

**Q699** The next several questions are about your **most recent** marriage.

**[PN: BEGIN LOOP B; RUN THROUGH LOOP B SAME NUMBER OF TIMES AS LOOP A; REFERENCE SAME DATES IN EACH ITERATION OF LOOP B THAT WERE REFERENCED IN THAT PARTICULAR ITERATION FOR LOOP A]**

**BASE: QUALIFIED RESPONDENTS**

**Q700 (Q3)** Did you meet your spouse who you married in [IF THIS IS THE FIRST LOOP, THEN INSERT Q615, ", ", Q616; ELSE, INSERT MONTH AND YEAR FROM THIS SAME ITERATION IN LOOP A, SEPARATED BY A COMMA AND A SPACE] online?

[RANDOMIZE]

- 01 Yes

02 No

[IF MET ONLINE (Q700/1) THEN ASK Q705; ELSE JUMP TO Q715.]

**BASE: MET ONLINE (Q700/1)**

**Q705 (Q4)** Where online did you meet? Please select the response that **best** describes how you met your spouse who you married in [IF THIS IS THE FIRST LOOP, THEN INSERT Q615, “, “. Q616; ELSE, INSERT MONTH AND YEAR FROM THIS SAME ITERATION IN LOOP A, SEPARATED BY A COMMA AND A SPACE].

[SINGLE RESPONSE, RANDOMIZE 01-10]

- 01 Instant Messaging (e.g., Yahoo Messenger, Skype, AIM)
- 02 Email
- 03 Chat Room
- 04 Discussion Group or posting Board
- 05 Online dating site
- 06 Social networking site (e.g., MySpace, Facebook, ClassMates)
- 07 Virtual world (e.g., Second Life, Kaneva, Outback)
- 08 Multi-player online game (e.g., World of Warcraft, Halo)
- 09 Online community
- 10 Message or comment on a personal website
- 11 Other [ANCHOR]

[PN: IF MET ON AN ONLINE DATING SITE (Q705/5), ASK Q710; ELSE JUMP TO PN BEFORE Q725.]

**BASE: MET ON AN ONLINE DATING SITE (Q705/5)**

**Q710 (Q5)** On which online dating website did you meet your spouse?

[SINGLE RESPONSE, RANDOMIZE 01-15, 17-19]

- 01 eHarmony
- 02 Match
- 03 Yahoo!Personals
- 04 Chemistry
- 05 AmericanSingles
- 06 True
- 07 PerfectMatch
- 08 PlentyofFish
- 09 Christiancafe
- 10 ChristianDating
- 11 Singlesnet
- 12 OkCupid
- 13 Zoosk
- 14 JDate
- 15 MSN Dating & Personals
- 16 Other [INSERT TEXT BOX] [ANCHOR]
- 17 ChristianMingle
- 18 ChristianSingles
- 19 AdultFriendFinder

[IF DID NOT MEET ONLINE (Q700/2), ASK Q715; ELSE JUMP TO PN BEFORE Q725.]

**BASE: DID NOT MEET ONLINE (Q700/2)**

**Q715 (Q6)** Please select the response that **best** describes how you met your spouse who you married in [IF THIS IS THE FIRST LOOP, THEN INSERT Q615, “, “. Q616; ELSE, INSERT MONTH AND YEAR FROM THIS SAME ITERATION IN LOOP A, SEPARATED BY A COMMA AND A SPACE].

[SINGLE RESPONSE, RANDOMIZE 01-09]

- 01 At work
- 02 Through friends
- 03 At school
- 04 Through family members



- 05 At a bar/club
- 06 At a place of worship
- 07 At a social gathering with friends
- 08 We grew up together/Have known since I was young
- 09 Through an arranged meeting/blind date
- 10 Other [ANCHOR]

**[PN: END LOOP B AFTER SAME NUMBER OF TIMES THAT LOOP A RAN.]**

[PN: IF MARRIED OR SEPARATED (Q600/1,3), ASK Q725; ELSE JUMP TO Q755.]

**BASE: MARRIED OR SEPARATED RESPONDENTS (Q600/1,3 & Q99/1)**

**Q725** Please indicate the degree of happiness, all things considered, of your [PN: Q610/2 INSERT "current"] marriage.

[PN: PLEASE PRESENT SCALE IN REVERSE ORDER FOR EVERY OTHER RESPONDENT]

- 1 Extremely Unhappy
- 2 Fairly Unhappy
- 3 A Little Unhappy
- 4 Happy
- 5 Very Happy
- 6 Extremely Happy
- 7 Perfect
- 8 Decline to answer ANCHOR

**BASE: MARRIED OR SEPARATED RESPONDENTS (Q600/1,3 & Q99/1)**

**Q726** How much do you agree with the following statement: I have a warm and comfortable marriage with my partner.

[PN: PLEASE PRESENT SCALE IN REVERSE ORDER FOR EVERY OTHER RESPONDENT]

- 1 Not at all True
- 2 A Little True
- 3 Somewhat True
- 4 Mostly True
- 5 Almost Completely True
- 6 Completely True
- 7 Decline to Answer ANCHOR

**BASE: MARRIED OR SEPARATED RESPONDENTS (Q600/1,3 & Q99/1)**

**Q727** How rewarding is your marriage with your partner?

[PN: PLEASE PRESENT SCALE IN REVERSE ORDER FOR EVERY OTHER RESPONDENT]

- 1 Not at all
- 2 A Little
- 3 Somewhat
- 4 Mostly
- 5 Almost Completely
- 6 Completely
- 7 Decline to Answer ANCHOR

**BASE: MARRIED OR SEPARATED RESPONDENTS (Q600/1,3 & Q99/1)**

**Q728** In general, how satisfied are you with your marriage?

[PN: PLEASE PRESENT SCALE IN REVERSE ORDER FOR EVERY OTHER RESPONDENT]

- 1 Not at all
- 2 A Little
- 3 Somewhat
- 4 Mostly

- 5 Almost Completely
- 6 Completely
- 7 Decline to Answer

ANCHOR

**BASE: MARRIED OR SEPARATED RESPONDENTS (Q600/1,3 & Q99/1)**

**Q750 (Q7)** Thinking of your spouse, to what extent do you agree or disagree with the following statements:

**Q751**

- |                   |   |   |   |   |   |                |
|-------------------|---|---|---|---|---|----------------|
| 1                 | 2 | 3 | 4 | 5 | 6 | 7              |
| Strongly disagree |   |   |   |   |   | Strongly agree |

[RANDOMIZE]

- 01 We have chemistry
- 02 We are happy
- 03 We are able to understand each other's feelings
- 04 We are able to show each other affection
- 05 We laugh a lot in our relationship
- 06 We are able to disagree with one another without losing our tempers
- 07 We "get" each other
- 08 We are in love
- 09 We have great communication
- 10 We are compatible
- 11 We trust each other

**BASE: QUALIFIED RESPONDENTS (Q99/1)**

**Q755 (Q16)** The following section contains questions that are purely for classification purposes only. Rest assured, your responses remain completely confidential and will not be associated with you. When it comes to religious beliefs, would you classify yourself primarily as...?

[DO NOT RANDOMIZE]

- 1 Catholic
- 2 Christian - Protestant
- 3 Jewish
- 4 Mormon
- 5 Muslim
- 6 Orthodox Church (Greek or Russian)
- 7 Other religion
- 8 Spiritual, but not affiliated with a religious group
- 9 Atheist/No Religion

**ISQ – IN SURVEY QUALITY METRICS – RESPONDENT INSTRUCTION STANDARD QUESTIONS****BASE: ALL QUALIFIED RESPONDENTS (Q99/1)****Q9457 isqri1** [Hidden Question]

Randomly select target response

- 1 To verify that you have read this question carefully please select the first response from the list below.
- 2 To verify that you have read this question carefully please select the second response from the list below.
- 3 To verify that you have read this question carefully please select the third response from the list below.
- 4 To verify that you have read this question carefully please select the fourth response from the list below.
- 5 To verify that you have read this question carefully please select the fifth response from the list below.

**BASE: ALL QUALIFIED RESPONDENTS (Q99/1)****Q9458 isqri2** [Hidden Question]

Randomly select response format

- 1 Agreement
- 2 Importance
- 3 Quality
- 4 Numeric Range

**BASE: ALL QUALIFIED RESPONDENTS (Q99/1)**

**Q9459 isqri3**

This question is a little different. While most people carefully read and respond to the questions in our surveys a small number do not. [Insert response from Q9457 isqri1]

- [PN: SHOW CODES 1-5 IF Q9458 isqri2/1, SHOW CODES 6-10 IF Q9458 isqri2/2,  
SHOW CODES 11-15 IF Q9458 isqri2/3, SHOW CODES 16-20 FOR Q9458 isqri2/4]
- 1 Strongly Agree
  - 2 Somewhat Agree
  - 3 Neither Agree or Disagree
  - 4 Somewhat Disagree
  - 5 Strongly Disagree
  - 6 Extremely Important
  - 7 Very Important
  - 8 Somewhat Important
  - 9 Not at all important
  - 10 Don't Know
  - 11 Very Good
  - 12 Good
  - 13 Fair
  - 14 Poor
  - 15 Very Poor
  - 16 0-5
  - 17 6-10
  - 18 11-25
  - 19 26-50
  - 20 50+

[PN: IF Q9458/ISQRI2 EQUALS 1 AND (Q9459/ISQRI3 DOES NOT EQUAL Q9457/ISQRI1) MARK AS Q232/1,  
IF Q9458/ISQRI2 EQUALS 2 AND ((Q9459/ISQRI3 - 5) DOES NOT EQUAL Q9457/ISQRI1) MARK AS Q232/1,  
IF Q9458/ISQRI2 EQUALS 3 AND ((Q9459/ISQRI3 - 10) DOES NOT EQUAL Q9457/ISQRI1) MARK AS Q232/1,  
IF Q9458/ISQRI2 EQUALS 4 AND ((Q9459/ISQRI3 - 15) DOES NOT EQUAL Q9457/ISQRI1) MARK AS Q232/1]

|                                  |
|----------------------------------|
| <b>SECTION 800: WEBOGRAPHICS</b> |
|----------------------------------|

**BASE: ALL RESPONDENTS US AGE 18+**

**Q1305** Next, we have a few more general questions for you.

On how many separate occasions would you say you watched news programs on TV during the past 30 days?

[RANGE: 0-120]

**BASE: ALL RESPONDENTS US AGE 18+**

**Q1310** On how many different occasions did you do vigorous physical exercise during the past 30 days?

[RANGE: 0-120]

**BASE: ALL RESPONDENTS US AGE 18+**

**Q1315** Do you think that community service should be a requirement in schools?

- 1 Yes
- 2 No

**BASE: ALL RESPONDENTS US AGE 18+**

**Q1320** Have you chosen not to purchase a product or service or told someone not to purchase a product or service made by a particular company because the company's actions or policies conflicted with your values or beliefs?

- 1 Yes, in the past year.
- 2 Yes, more than 1 year ago, but within the past 2 years.
- 3 Yes, more than 2 years ago, but within the past 3 years.
- 4 Yes, more than 3 years ago.
- 5 No, I have never done this.

**BASE: ALL RESPONDENTS US AGE 18+**

**Q1325** Most companies today want to know about the individual interests and lifestyle of their customers so they can tailor their information services and products to each customer's personal preferences. In general, do you see such personalization as a good thing?

- 1 Yes
- 2 No

|                                  |
|----------------------------------|
| <b>SECTION 300: DEMOGRAPHICS</b> |
|----------------------------------|

**BASE: ALL RESPONDENTS****Q308** [HIDDEN QUESTION - MANDATORY QUESTION SELECTION.]

[MULTIPLE RESPONSE]

[PROGRAMMER: PICK CODES 1,3,5,6,8, 11-13.]

- 01 GEOGRAPHICAL REGION (STATE/PROVINCE/REGION) (Q318)**
- 03 ZIP/POSTAL CODE (Q326)**
- 05 INTERNET USAGE (Q350,Q354)**
- 06 SEQUENTIAL EMPLOYMENT (Q398-Q410)**
- 08 EDUCATION (Q434-Q437)**
- 09 SCHOOL LOCATION (Q440)
- 10 PARENTAL EDUCATION (Q444,Q446)
- 11 INCOME (Q450-Q466)**
- 12 HISPANIC ORIGIN (Q474)**
- 13 ETHNICITY (Q478-Q485)**
- 15 SWEEPSTAKES (Q510-512, Q354, Q514)
- 16 SURVEY EVALUATION (Q516,Q518,Q522)
- 97 NONE E

**BASE: ALL RESPONDENTS****Q310** [HIDDEN QUESTION – OPTIONAL QUESTION SELECTION.][PROGRAMMER NOTE: **SELECT 1,4,5.** DO NOT ASK Q364.]

[MULTIPLE RESPONSE]

- 1 OPTIONAL BATCH 1 – HOUSEHOLD QUESTIONS (Q364, Q368, Q372)**
- 2 OPTIONAL BATCH 2 – HOUSEHOLD QUESTIONS AND YEAR OF BIRTH OF CHILDREN (Q364, Q368, Q372, Q376-Q381)
- 3 PLACEHOLDER
- 4 OPTIONAL BATCH 4 – EMPLOYMENT AND INVESTABLE ASSETS QUESTIONS (Q424,Q428, Q470)**
- 5 OPTIONAL BATCH 5 – SEXUAL ORIENTATION QUESTIONS (Q498, Q500, Q504)**
- 6 OPTIONAL BATCH 6 - INTERNET CONNECTION (Q336-Q346)
- 7 OPTIONAL BATCH 7 - LANGUAGE FOR WEIGHTING (Q492)
- 8 OPTIONAL BATCH 8 - HOUSEHOLD TELEPHONES (Q358, Q360)
- 9 OPTIONAL BATCH 9 - SOCIAL CLASS (Q414, Q417, Q421)
- 10 OPTIONAL BATCH 10 - SPOKEN HH LANGUAGE (Q488-Q490)
- 99 NO OPTIONAL QUESTIONS E

|                                        |
|----------------------------------------|
| <b>ISQ – IN SURVEY QUALITY METRICS</b> |
|----------------------------------------|

**BASE: ALL QUALIFIED RESPONDENTS Q99/1****Q229** BEHIND THE SCENES QUESTION TO DETERMINE WHICH ISQ METRIS WILL BE USED IN SURVEY

[PN: SELECT CODES THOSE CODES 1, 2]

- 1 – MINIMUM LOI
- 2 – INCORRECT RESPONSE TO RESPONDENT INSTRUCTION
- 3 - IDENTIFY RESPONDENTS WHO STRAIGHT-LINE THROUGH GRID QUESTIONS
- 4 - LESS THAN 5 CHARACTERS AT OPEN-END RESPONSE
- 5 – ILLOGICAL RESPONSE TO SURVEY QUESTIONS
- 9 – NONE - NOT USING ISQ IN THIS SURVEY

**BASE: MINIMUM LOI Q229/1****Q230** LENGTH OF INTERVIEW (LOI) COMPUTE

[CALCULATE THE LOI AS TIME TAKEN FOR THE ENTIRE SURVEY (Q258 TO END OF SURVEY) – Q119 – Q112]

**BASE: MINIMUM LOI Q229/1**

**Q231 LENGTH OF INTERVIEW (LOI) TEST**

PROGRAMMER NOTE – IF THE ACTUAL LOI IS LESS THAN THE MINIMUM ESTIMATED LOI, GET CODE 1 OTHERWISE GET CODE 2

1 YES  
2 NO

**BASE: RESPONDENT INSTRUCTION Q229/2**

**Q232 RESPONDENT INSTRUCTION**

[ PN: IF Q9458/ISQRI2 EQUALS 1 AND (Q9459/ISQRI3 DOES NOT EQUAL Q9457/ISQRI1) MARK AS Q231/1, IF Q9458/ISQRI2 EQUALS 2 AND ((Q9459/ISQRI3 - 5) DOES NOT EQUAL Q9457/ISQRI1) MARK AS Q231/1, IF Q9458/ISQRI2 EQUALS 3 AND ((Q9459/ISQRI3 - 10) DOES NOT EQUAL Q9457/ISQRI1) MARK AS Q231/1, IF Q9458/ISQRI2 EQUALS 4 AND ((Q9459/ISQRI3 - 15) DOES NOT EQUAL Q9457/ISQRI1) MARK AS Q231/1 OTHERWISE GET CODE 2]

1 YES  
2 NO

**BASE: STRAIGHT LINING Q229/3**

**Q235 STRAIGHT LINING**

PROGRAMMER NOTE – DID THE RESPONDENT STRAIGHT LINE AT QXXX

[PN: GET CODE 1 IF THE RESPONDENT STRAIGHT LINED AT QXXX]

1 YES  
2 NO

**BASE: INCOMPLETE RESPONSE AT OPEN END Q229/4**

**Q236 INCOMPLETE RESPONSE AT OPEN END**

PROGRAMMER NOTE – DID RESPONDENT PROVIDE A RESPONSE OF LESS THAN 5 CHARACTERS AT QXXX

[PN: GET CODE 1 IF THE RESPONDENT PROVIDED LESS THAN 5 CHARACTERS AT QXX] OTHERWISE GET CODE 2

1 YES  
2 NO

**BASE: ILLOGICAL CHOICE COMBINATION Q229/5**

**Q238 ILLOGICAL CHOICE COMBINATION**

PROGRAMMER NOTE – DID RESPONDENT PROVIDE AN ILLOGICAL RESPONSE AT QXXX AND QXXX

[PN: GET CODE 1 IF RESPONDENT INDICATED QXXX/X AND QXXX/X]

1 YES  
2 NO

**BASE: ISQ USED Q229/1-5**

**Q239 INDICATE WHICH QUALITY CHECKS FAILED**

[MULTIPLE RESPONSE]

[PN: GET CODE 1 IF Q231/1, GET CODE 2 IF Q232/1, GET CODE 3 IF Q235/1, GET CODE 4 IF Q236/1, GET CODE 5 IF Q238/1]

1 – MINIMUM LOI  
2 – INCORRECT RESPONSE TO RESPONDENT INSTRUCTION  
3 - IDENTIFY RESPONDENTS WHO STRAIGHT-LINE THROUGH GRID QUESTIONS  
4 - LESS THAN 5 CHARACTERS AT OPEN-END RESPONSE  
5 – ILLOGICAL RESPONSE TO SURVEY QUESTIONS

[PN: IF FAILED INCORRECT RESPONSE, MARK AS ISQ FAILURE AT Q59.]

**BASE: ISQ USED Q229/1-5**

**Q240** INDICATE WHICH QUALITY CHECKS FAILED  
[SINGLE RESPONSE]

[PN: GET CODE 1 IF Q239 NUMBER OF ANSWERS IS 1, GET CODE 2 IF Q239 NUMBER OF ANSWERS IS 2, GET CODE 3 IF Q239 NUMBER OF ANSWERS IS 3, GET CODE 4 IF Q239 NUMBER OF ANSWERS IS 4 GET CODE 5 IF Q239 NUMBER OF ASNWERS IS 5. GET CODE 6 IF Q239 NUMBER OF ANSWERS IS 0.]

- 1 FAILED ONE
- 2 FAILED TWO
- 3 FAILED THREE
- 4 FAILED FOUR
- 5 FAILED FIVE
- 6 FAILED NONE

**BASE: ALL RESPONDENTS**

- Q59** STATUS OF RESPONDENT (LABELS ALSO USED IN ICW SAMPLE DISPOSITION REPORTS)
- 1 Over quota (Q99/3)
  - 2 Screener Refusal #1 (INSERT DEFINITION AS QXXX/RESPONSE CHOICE)
  - 3 Screener Refusal #2 (INSERT DEFINITION AS QXXX/RESPONSE CHOICE)
  - 4 Screener Refusal #3 (INSERT DEFINITION AS QXXX/RESPONSE CHOICE)
  - 5 Screener Refusal #4 (INSERT DEFINITION AS QXXX/RESPONSE CHOICE)
  - 6 Screener Refusal #5 (INSERT DEFINITION AS QXXX/RESPONSE CHOICE)
  - 25 Screener Not Qualified #1 Under Age (WEB/PHONE AND UNDER AGE REQUIREMENT (Q149/1 AND Q283/1=1) OR (Q149/2 AND Q283/2=1) OR INSERT DEFINITION AS QXXX/RESPONSE CHOICE)
  - 26 Screener Not Qualified #2 (INSERT DEFINITION AS QXXX/RESPONSE CHOICE)
  - 27 Screener Not Qualified #3 (INSERT DEFINITION AS QXXX/RESPONSE CHOICE)
  - 28 Screener Not Qualified #4 (INSERT DEFINITION AS QXXX/RESPONSE CHOICE)
  - 29 Screener Not Qualified #5 (INSERT DEFINITION AS QXXX/RESPONSE CHOICE)
  - 99 COMPLETE (Q99/1)
  - 996 DF Fail (isdup/1)
  - 997 Fraud Score Failure (Q9452 fraudscore /1)
  - 998 Failed ISQ (Q240/2 OR Q239/2)

**BASE: ALL RESPONDENTS**

- Q60** STATUS OF RESPONDENT (DOES NOT APPEAR ON SCREEN)
- 1 QUALIFIED RESPONDENTS, QUOTA OPEN
  - 2 PARTIALLY QUALIFIED, QUOTA OPEN
  - 3 QUALIFIED RESPONDENTS, QUOTA CLOSED
  - 4 PARTIALLY QUALIFIED RESPONDENTS, QUOTA CLOSED
  - 5 ISQ/DF FAILS [PN: IF Q59/996, 997, or 998 CODE AS Q60/5 – GRANT HI POINTS]
  - 6 NOT QUALIFIED

[PN: IF USAMP (Q75/37) REDIRECT AS LISTED BELOW:

**Success:** <http://u-samp.com/redirect.php?S=1&ID=>

**Fail:** <http://u-samp.com/redirect.php?S=2&ID=>

**Over-Quota:** <http://u-samp.com/redirect.php?S=3&ID=>





### Codebook for Harris Marriage and Divorce Study Final Data Set

The following is a listing of all variables in the Harris Marriage and Divorce Study Final data set with annotations for the data set and computations for how the variable was derived. Specific Value Designations are listed in the SPSS data file.

This final data set was derived from the original Harris data file and excluded the following participants: 1) Any individual who reported being married multiple times and 2) any individual who reported being engaged. We determined that individuals who reported being engaged must also have been married and had that marriage end and started a second relationship that was on the way to being married, thus we considered those individuals as married multiple times.

| Variable Name | Label                                                                           | Derivation Source of Variable |
|---------------|---------------------------------------------------------------------------------|-------------------------------|
| SC_ID         | Survey ID.                                                                      | Original Data Set             |
| Q3            | Q3 Respondent ID                                                                | Original Data Set             |
| Q75           | Q75 (QV7) SAMPLE SUPPLIER                                                       | Original Data Set             |
| Q264          | Q264 In which country or region do you currently reside?                        | Original Data Set             |
| Q268          | Q268 Are you...?                                                                | Original Data Set             |
| Q270A1        | Q270 In what year were you born?                                                | Original Data Set             |
| Q280          | Q280 Respondent Age.                                                            | Original Data Set             |
| Age_Category  | Respondents age broken into categories method 1                                 |                               |
| Q600          | Q600 (Q1) What is your current marital status?                                  | Original Data Set             |
| Q605          | Q605 (Q1a) Have you gotten married since 2005 (including 2005)?                 | Original Data Set             |
| Q610          | Q610 (Q1b) How many times have you been married since 2005 (including 2005)?    | Original Data Set             |
| Q615          | Q615 (Q2a) When did you get married to your current/most recent spouse? - Month | Original Data Set             |

|           |                                                                                                                                              |                                                                                                                                     |
|-----------|----------------------------------------------------------------------------------------------------------------------------------------------|-------------------------------------------------------------------------------------------------------------------------------------|
| Q616      | Q616 (Q2a) When did you get married to your current/most recent spouse? - Year                                                               | Original Data Set                                                                                                                   |
| Q640      | Q640 When did you get divorced from your most recent spouse? - Month                                                                         | Original Data Set                                                                                                                   |
| Q641      | Q641 When did you get divorced from your most recent spouse? - Year                                                                          | Original Data Set                                                                                                                   |
| Q616_year | Year the respondent was married represented in year                                                                                          | This was a recode of variable Q616 to express the year of marriage in the actual year which was used to compute relationship length |
| Q641_Year | Year the respondent was divorced represented in year                                                                                         | This was a recode of variable Q640 to express the year of divorce in the actual year which was used to compute relationship length  |
| Q685      | Q685 QUALIFICATION QUESTION                                                                                                                  | Original Data Set                                                                                                                   |
| Q99       | Q99 SCREENER QUALIFICATION IDENTIFICATION QUESTION                                                                                           | Original Data Set                                                                                                                   |
| Q700A1    | Q700A1 (Q3) Loop 1: Did you meet your spouse who you married in ... online?                                                                  | Original Data Set                                                                                                                   |
| Q705A1    | Q705A1 (Q4) Loop 1: Where online did you meet? Please select the response that best describes how you met your spouse who you married in ... | Original Data Set                                                                                                                   |
| Q710A1    | Q710A1 (Q5) Loop 1: On which online dating website did you meet your spouse?                                                                 | Original Data Set                                                                                                                   |
| Q715A1    | Q715A1 (Q6) Loop 1: Please select the response that best describes how you met your spouse who you married in ...                            | Original Data Set                                                                                                                   |
| Q725      | Q725 Please indicate the degree of happiness, all things considered, of your current marriage.                                               | Original Data Set                                                                                                                   |
| Q726      | Q726 How much do you agree with the following statement: I have a warm and comfortable marriage with my partner.                             | Original Data Set                                                                                                                   |

|        |                                                                                                                                                                                     |                   |
|--------|-------------------------------------------------------------------------------------------------------------------------------------------------------------------------------------|-------------------|
| Q727   | Q727 How rewarding is your marriage with your partner?                                                                                                                              | Original Data Set |
| Q728   | Q728 In general, how satisfied are you with your marriage?                                                                                                                          | Original Data Set |
| Q751A1 | Q751A1 (Q7) 1. We have chemistry: Thinking of your spouse, to what extent do you agree or disagree with the following statements:                                                   | Original Data Set |
| Q751A2 | Q751A2 (Q7) 2. We are happy: Thinking of your spouse, to what extent do you agree or disagree with the following statements:                                                        | Original Data Set |
| Q751A3 | Q751A3 (Q7) 3. We are able to understand each other's feelings: Thinking of your spouse, to what extent do you agree or disagree with the following statements:                     | Original Data Set |
| Q751A4 | Q751A4 (Q7) 4. We are able to show each other affection: Thinking of your spouse, to what extent do you agree or disagree with the following statements:                            | Original Data Set |
| Q751A5 | Q751A5 (Q7) 5. We laugh a lot in our relationship: Thinking of your spouse, to what extent do you agree or disagree with the following statements:                                  | Original Data Set |
| Q751A6 | Q751A6 (Q7) 6. We are able to disagree with one another without losing our tempers: Thinking of your spouse, to what extent do you agree or disagree with the following statements: | Original Data Set |
| Q751A7 | Q751A7 (Q7) 7. We "get" each other: Thinking of your spouse, to what extent do you agree or disagree with the following statements:                                                 | Original Data Set |

|         |                                                                                                                                             |                   |
|---------|---------------------------------------------------------------------------------------------------------------------------------------------|-------------------|
| Q751A8  | Q751A8 (Q7) 8. We are in love: Thinking of your spouse, to what extent do you agree or disagree with the following statements:              | Original Data Set |
| Q751A9  | Q751A9 (Q7) 9. We have great communication: Thinking of your spouse, to what extent do you agree or disagree with the following statements: | Original Data Set |
| Q751A10 | Q751A10 (Q7) 10. We are compatible: Thinking of your spouse, to what extent do you agree or disagree with the following statements:         | Original Data Set |
| Q751A11 | Q751A11 (Q7) 11. We trust each other: Thinking of your spouse, to what extent do you agree or disagree with the following statements:       | Original Data Set |
| Q755    | Q755 (Q16) When it comes to religious beliefs, would you classify yourself primarily as?                                                    | Original Data Set |
| Q318    | Q318 In what state, province or territory do you currently reside?                                                                          | Original Data Set |
| Q320    | Q320 U.S. Region-Harris Interactive Definition.                                                                                             | Original Data Set |
| Q326    | Q326 What is your zip code?                                                                                                                 | Original Data Set |
| Q350    | Q350 How many hours per week do you typically spend on the Internet or World Wide Web?                                                      | Original Data Set |
| Q437    | Q437 What is the highest level of education you have completed or the highest degree you have received?                                     | Original Data Set |
| Q406M1  | Q406M1 Employed full time: What is your employment status?                                                                                  | Original Data Set |
| Q406M2  | Q406M2 Employed part time: What is your employment status?                                                                                  | Original Data Set |

|           |                                                                                                                                                                        |                                                                                                       |
|-----------|------------------------------------------------------------------------------------------------------------------------------------------------------------------------|-------------------------------------------------------------------------------------------------------|
| Q406M3    | Q406M3 Self-employed: What is your employment status?                                                                                                                  | Original Data Set                                                                                     |
| Q406M4    | Q406M4 Not employed, but looking for work: What is your employment status?                                                                                             | Original Data Set                                                                                     |
| Q406M5    | Q406M5 Not employed and not looking for work: What is your employment status?                                                                                          | Original Data Set                                                                                     |
| Q406M6    | Q406M6 Retired: What is your employment status?                                                                                                                        | Original Data Set                                                                                     |
| Q406M7    | Q406M7 Not employed, unable to work due to a disability or illness: What is your employment status?                                                                    | Original Data Set                                                                                     |
| Q406M8    | Q406M8 Student: What is your employment status?                                                                                                                        | Original Data Set                                                                                     |
| Q406M9    | Q406M9 Stay-at-home spouse or partner: What is your employment status?                                                                                                 | Original Data Set                                                                                     |
| Q406M99   | Q406M99 Unknown: What is your employment status?                                                                                                                       | Original Data Set                                                                                     |
| Q466      | Q466 Compared to all households in your country in the year 2011, would you estimate that your overall total household income was above or below the national average? | Original Data Set                                                                                     |
| Q462      | Q462 Which of the following income categories best describes your total 2011 household income before/after taxes?                                                      | Original Data Set                                                                                     |
| Q485      | Q485 Racial Background.                                                                                                                                                | Original Data Set                                                                                     |
| Q60       | Q60 STATUS OF RESPONDENT                                                                                                                                               | Original Data Set                                                                                     |
| wts       | Weights.                                                                                                                                                               | Original Data Set                                                                                     |
| CSI       | Mean CSI score                                                                                                                                                         | This is the mean Couples Satisfaction Index (Funk & Rogge, 2007) score (Items Q725, Q726, Q727, Q728) |
| Other_sat | Mean Other Satisfaction Scores                                                                                                                                         | This is the mean of all other relationship quality items (Q751A1)                                     |

|                        |                                                                |                                                                                                                                                                                                     |
|------------------------|----------------------------------------------------------------|-----------------------------------------------------------------------------------------------------------------------------------------------------------------------------------------------------|
|                        |                                                                | through Q751A11)                                                                                                                                                                                    |
| total_sat              | Mean CSI and other Satisfaction item scores                    | This is the average of the mean CSI and the Mean of all other relationship quality items. We did not combine all items equally but summed the two scales, and then used the mean of the two scales. |
| Catholic_Dummy         | Dummy coding for individuals who are Catholic                  | All individuals who reported being Catholic (Q755 = 1) were coded at 1, all others in sample were coded as 0                                                                                        |
| Christian_Dummy        | Dummy coding for individuals who are Christian                 | All individuals who reported being Christian (Q755 = 2) were coded at 1, all others in sample were coded as 0                                                                                       |
| Jewish_Dummy           | Dummy coding for individuals who are Jewish                    | All individuals who reported being Jewish (Q755 = 3) were coded at 1, all others in sample were coded as 0                                                                                          |
| Mormon_Dummy           | Dummy coding for individuals who are Mormon                    | All individuals who reported being Mormon (Q755 = 4) were coded at 1, all others in sample were coded as 0                                                                                          |
| Spiritual_Dummy        | Dummy coding for individuals who are Spiritual                 | All individuals who reported being Spiritual but not affiliated with a religious group (Q755 = 8) were coded at 1, all others in sample were coded as 0                                             |
| Athiest_Dummy          | Dummy coding for individuals who are Athiest                   | All individuals who reported being Athiest/No Religion (Q755 = 9) were coded at 1, all others in sample were coded as 0                                                                             |
| Other_religion_Dummy   | Dummy coding for individuals who are some other religion       | All individuals who reported being Muslim, Orthodox, or "Other" religion (Q755 = 5, 6, or 7) were coded at 1, all others in sample were coded as 0                                                  |
| White_Dummy            | Dummy coding for individuals who are White                     | All individuals who reported being White (Q485 = 1) were coded at 1, all others in sample were coded as 0                                                                                           |
| Black_AA_Dummy         | Dummy coding for individuals who are Black/African American    | All individuals who reported being Black or African American (Q485 = 2 or 8) were coded at 1, all others in sample were coded as 0                                                                  |
| Hispanic_Dummy         | Dummy coding for individuals of Hispanic descent               | All individuals who reported being Hispanic (Q485 = 7) were coded at 1, all others in sample were coded as 0                                                                                        |
| Asian_PI_Dummy         | Dummy coding for individuals who are Asian or Pacific Islander | All individuals who reported being Asian or Pacific Islander (Q485 = 3) were coded at 1, all others in sample were coded as 0                                                                       |
| Other_Ethnicity_Dummy  | Dummy coding for individulas of "Other Ethnicity"              | All individuals who reported being Native American or Alaskan Native, Mixed Race, or some other race (Q485= 4 or 5 or 6) were coded at 1, all others in sample were coded as 0                      |
| Inc_less_than_15_Dummy | Dummy coding for individuals who earn                          | All individuals who reported income below \$15,000 (Q462 = 1)                                                                                                                                       |

|                         |                                                                       |                                                                                                                                           |
|-------------------------|-----------------------------------------------------------------------|-------------------------------------------------------------------------------------------------------------------------------------------|
|                         | less than \$15,000                                                    | were coded at 1, all others in sample were coded as 0                                                                                     |
| Inc_15_24_Dummy         | Dummy coding for individuals who earn between \$15,000 and \$24,999   | All individuals who reported income between \$15,000 and \$24,999 (Q462 = 2) were coded at 1, all others in sample were coded as 0        |
| Inc_25_34_Dummy         | Dummy coding for individuals who earn between \$25,000 and \$34,999   | All individuals who reported income between \$25,000 and \$34,999 (Q462 = 3) were coded at 1, all others in sample were coded as 0        |
| Inc_35_49_Dummy         | Dummy coding for individuals who earn between \$35,000 and \$49,999   | All individuals who reported income between \$35,000 and \$49,999 (Q462 = 4) were coded at 1, all others in sample were coded as 0        |
| Inc_50_74_Dummy         | Dummy coding for individuals who earn between \$50,000 and \$74,999   | All individuals who reported income between \$50,000 and \$74,999 (Q462 = 5) were coded at 1, all others in sample were coded as 0        |
| Inc_75_99_Dummy         | Dummy coding for individuals who earn between \$75,000 and \$99,999   | All individuals who reported income between \$75,000 and \$99,999 (Q462 = 6) were coded at 1, all others in sample were coded as 0        |
| Inc_100_149_Dummy       | Dummy coding for individuals who earn between \$100,000 and \$149,000 | All individuals who reported income between \$100,000 and \$149,000 (Q462 = 7 or 8) were coded at 1, all others in sample were coded as 0 |
| Inc_150_199_Dummy       | Dummy coding for individuals who earn between \$150,000 and \$199,999 | All individuals who reported income between \$150,000 and \$199,999 (Q462 = 9) were coded at 1, all others in sample were coded as 0      |
| Inc_more_than_200_Dummy | Dummy coding for individuals who earn more than \$200,000             | All individuals who reported income over \$200,000 (Q462 = 10 or 11) were coded at 1, all others in sample were coded as 0                |
| Age_18_19_Dummy         | Dummy coding for individuals who are 18-19 years old                  | All individuals who reported being 18-19 (AGE_CATEGORY = .5) were coded at 1, all others in sample were coded as 0                        |
| Age_20_24_Dummy         | Dummy coding for individuals who are 20-24 years old                  | All individuals who reported being 20-24 (AGE_CATEGORY = 1) were coded at 1, all others in sample were coded as 0                         |
| Age_25_34_Dummy         | Dummy coding for individuals who are 25-34 years old                  | All individuals who reported being 25-34 (AGE_CATEGORY = 2) were coded at 1, all others in sample were coded as 0                         |
| Age_35_44_Dummy         | Dummy coding for individuals who are 35-44 years old                  | All individuals who reported being 35-44 (AGE_CATEGORY = 3) were coded at 1, all others in sample were coded as 0                         |
| Age_45_54_Dummy         | Dummy coding for individuals who are 45-54 years old                  | All individuals who reported being 45-54 (AGE_CATEGORY = 4) were coded at 1, all others in sample were coded as 0                         |

|                                  |                                                                                                 |                                                                                                                                                                                                                                                                                                                                                                                                             |
|----------------------------------|-------------------------------------------------------------------------------------------------|-------------------------------------------------------------------------------------------------------------------------------------------------------------------------------------------------------------------------------------------------------------------------------------------------------------------------------------------------------------------------------------------------------------|
| Age_55_64_Dummy                  | Dummy coding for individuals who are 55-64 years old                                            | All individuals who reported being 55-64 (AGE_CATEGORY = 4) were coded at 1, all others in sample were coded as 0                                                                                                                                                                                                                                                                                           |
| Age_More_Than_65_Dummy           | Dummy coding for individuals who are 65+ years old                                              | All individuals who reported being 65 or older (AGE_CATEGORY = 5) were coded at 1, all others in sample were coded as 0                                                                                                                                                                                                                                                                                     |
| High_School_or_Less_Dummy        | Dummy coding for individuals who have a high school education or less                           | All individuals who reported some or all High school education (Q437 = 1, 2 or 3) were coded at 1, all others in sample were coded as 0                                                                                                                                                                                                                                                                     |
| Associates_or_Job_Training_Dummy | Dummy coding for individuals who have an associates degree or job training (post high school)   | All individuals who reported an associates degree or job training (Q437 = 70 or 71) were coded at 1, all others in sample were coded as 0                                                                                                                                                                                                                                                                   |
| Some_or_all_College_Dummy        | Dummy coding for individuals who have some college or a college degree                          | All individuals who reported some or all college (Q437 = 72,73, or 74) were coded at 1, all others in sample were coded as 0                                                                                                                                                                                                                                                                                |
| Some_or_all_Graduate_Dummy       | Dummy coding for individuals who have some graduate work or a graduate degree                   | All individuals who reported some or all graduate school (Q437 = 75 or 76) were coded at 1, all others in sample were coded as 0                                                                                                                                                                                                                                                                            |
| Master_On_Line                   | Designation of source of meeting for individuals who met their spouse on-line                   | This variable codes only individuals who met on-line and the source of that meeting. Individuals who met offline are not given a value. Coded from variable Q705A1                                                                                                                                                                                                                                          |
| Master_Off_Line                  | Designation of source of meeting for individuals who met their spouse off-line                  | This variable codes only individuals who met off-line and the source of that meeting. Individuals who met on-line were not given a value. Coded from variable Q715A1                                                                                                                                                                                                                                        |
| Master_Dating                    | Designation of source of meeting for individuals who met their spouse on an on-line dating site | This variable codes only individuals who met via an on-line dating site and the source of that meeting. Individuals who met via some other means were not given a code. This was coded from variable Q710A1. All named sites that had fewer than 100 marriages were combined into a single group named "small", all individual who met via an unnamed site were combined into a single group named "other". |
| Divorced                         | Dummy coding for individuals who reported being currently divorced                              | All individuals who reported being currently Divorced (Q600 = 2) were coded at 1, all others in sample were coded as 0                                                                                                                                                                                                                                                                                      |
| Separated                        | Dummy coding for individuals who reported being currently separated                             | All individuals who reported being currently separated (Q600 = 3) were coded as 1, all others in sample were coded as 0                                                                                                                                                                                                                                                                                     |
| Married                          | Dummy coding for individuals who reported being currently married                               | All individuals who reported being currently married (Q600 = 1) were coded as 1, all others in sample were coded as 0.                                                                                                                                                                                                                                                                                      |



|                                |                                                                                                                                                                      |                                                                                                                                                                          |
|--------------------------------|----------------------------------------------------------------------------------------------------------------------------------------------------------------------|--------------------------------------------------------------------------------------------------------------------------------------------------------------------------|
| Divorced_Separated             | Dummy coding for individuals who reported being currently divorced or separated                                                                                      | All individuals who reported being currently divorced or separated (Q600 = 2 or Q600 = 3_ were coded at 1, all others in sample were coded as 0.                         |
| Days_married_for_Divorced      | Days in relationship for all who were divorced computed from first day of month married to first day of month divorced                                               | Derived from Q615 and Q616 (to determine when marriage started) and Q640 and Q641 (to determine when divorce occurred)                                                   |
| Days_married_for_still_married | Days in relationship for all who were still married computed from first day of month married to first of July 2012                                                   | Derived from Q615 and Q616 (to determine when marriage started) and July 1, 2012 (designed date to measure length of relationship from a common day)                     |
| Days_in_Relationship_All       | Days in relationship for all relationship status except widowed computed as ain days                                                                                 | Combines "Days_married_for_Divorced" and "Days_married_for_still_married" so all individuals have a designed relationship length                                         |
| Master_Dating_Big              | Designation of source of meeting for individuals who met their spouse on an on-line dating site combing all sites with less than 200 marriages for survival analysis | Derived from Master_Dating. Combines all sites who had less than 200 marriages into a single "other" category for survival analysis.                                     |
| Master_On_Line_Big             | Designation of source of meeting for individuals who met their spouse on-line combining all methods that with less then 200 marriages for survival analysis          | Derived from Master_On_Line. Combines all methods of meeting that had less than 200 marriages into a single "other" category for survival analysis.                      |
| wts_2                          | Rounding the weighting scores for the survival analysis (this analysis would not run without complete cases)                                                         | Derived from wts. It rounds the wts variable to the nearest whole number to uses in survival analysis (Kaplan-Meier analyses do not work with fractional cases).         |
| New_Ethnicity_Breakdown        | Ethnicity breakdown for final demographic analysis, combines small groupings into "other" category                                                                   | Derived from Q485, combines "Native American or Alaska Native", "Mixed Race", and "Some other race" into "other" category, also combines "Black" with "African American" |
| New_Income_Breakdown           | Income category breakdown for final demographic analysis, combines categories above 100K                                                                             | Derived from Q462, creates income brackets of \$100,000-\$149,999, \$150,000-\$199,999, and over \$200,000                                                               |
| New_Education_Breakdown        | Education category breakdown for final demographic analysis, combines all high                                                                                       | Derived from Q437, combines all high school education outcomes, all college education outcomes, all graduate school                                                      |

|                                    |                                                                                                         |                                                                                                                                                                                  |
|------------------------------------|---------------------------------------------------------------------------------------------------------|----------------------------------------------------------------------------------------------------------------------------------------------------------------------------------|
|                                    | school, job training and associates, all college, and all graduate school                               | education outcomes, and associates with job training.                                                                                                                            |
| New_Religion_Breakdown             | Religion category breakdown for final demographic analysis, combines small groups into "other" category | Derived from Q755, combines "Muslim", "Orthodox Church" and "Other religion" into single "other category".                                                                       |
| New_Employment_Working             | Dummy code for all individuals working (full, part, and self-employed)                                  | All individuals who reported some form of employment (full part or self) were coded as 1. All other individuals were coded as 0                                                  |
| New_Employment_Not_Working         | Dummy code for all individuals not working (all reasons)                                                | All individuals who reported not being employed for any reason were coded as 1. All other individuals were coded as 0 (this is the reciprocal value as "New_Employment_Working") |
| New_Employment_Retired             | Dummy code for all individuals who reported being retired                                               | All individuals who reported being retired were coded as 1. All other individuals were coded as 0                                                                                |
| New_Employment_Student             | Dummy code for all individuals who reported being a student                                             | All individuals who reported being a student were coded as 1. All other individuals were coded as 0                                                                              |
| New_Employment_Stay_at_Home_Parent | Dummy code for all individuals who reported being a stay at home parent                                 | All individuals who reported being a stay-at-home parent were coded as 1. All other individuals were coded as 0.                                                                 |

Ethnicity and Religion were recoded to permit comparison to US Population data. The codes are as follows:

New Ethnicity:

- 1) Caucasian/White
- 2) Black/African American
- 3) Hispanic
- 4) Asian/Pacific Islander
- 5) Other

New Religion:

- 1) Catholic
- 2) Christian
- 3) Jewish
- 4) Mormon
- 5) Spiritual but unaffiliated
- 6) Atheist
- 7) Other
