# Supplementary material
Source: PubMed Central journal article supplement (PMC3690854)
Supplement: 1222447110_sapp02.pdf [file 1222447110_sapp02.pdf]

## Interactions with Categorical Variables

The sample size and main effects that bear on the experimental hypotheses (see text) are statistically well-powered. This is not the case for the interactions involving categorical predictors (which were not a focus of the research). Many of the cell sizes are quite small ( $<<30$ ) for the categorical by categorical interactions so we provide these data for the interested reader without interpretation to avoid the suggestion that these values constitute reliable population estimates. The data will point to possible questions on which more narrowly focused follow-up research might investigate.

### Does meeting in different ONLINE VENUES (variable name "master\_on\_line") predict marital breakup?

WITHOUT INTERACTIONS:

|                    |           | Robust    |       |       |                      |           |
|--------------------|-----------|-----------|-------|-------|----------------------|-----------|
| divorced_separated | Coef.     | Std. Err. | z     | P> z  | [95% Conf. Interval] |           |
| -----+-----        |           |           |       |       |                      |           |
| master_on_line     |           |           |       |       |                      |           |
| 2                  | -1.503472 | .7633381  | -1.97 | 0.049 | -2.999587            | -.0073568 |
| 3                  | -.9505211 | .3521841  | -2.70 | 0.007 | -1.640789            | -.2602529 |
| 4                  | .091875   | .5928069  | 0.15  | 0.877 | -1.070005            | 1.253755  |
| 6                  | -.4956845 | .3040722  | -1.63 | 0.103 | -1.091655            | .1002859  |
| 7                  | -.0506347 | .4516484  | -0.11 | 0.911 | -.9358494            | .83458    |
| 8                  | -.5543686 | .4209992  | -1.32 | 0.188 | -1.379512            | .2707746  |
| 9                  | -.8964082 | .465815   | -1.92 | 0.054 | -1.809389            | .0165723  |
| 10                 | -.9987003 | .605321   | -1.65 | 0.099 | -2.185108            | .187707   |
| 11                 | -.9281153 | .5131366  | -1.81 | 0.070 | -1.933845            | .077614   |
| 12                 | -.5534192 | .2851425  | -1.94 | 0.052 | -1.112288            | .0054498  |

Chi-squared test for master\_on\_line:

$$\text{chi2}(10) = 14.16$$

$$\text{Prob} > \text{chi2} = 0.1659$$

INTERACTION WITH AGE

|                    |           | Robust    |       |       |                      |           |
|--------------------|-----------|-----------|-------|-------|----------------------|-----------|
| divorced_separated | Coef.     | Std. Err. | z     | P> z  | [95% Conf. Interval] |           |
| -----+-----        |           |           |       |       |                      |           |
| master_on_line     |           |           |       |       |                      |           |
| 2                  | -1.495319 | .7630192  | -1.96 | 0.050 | -2.99081             | .0001707  |
| 3                  | -1.005257 | .3638144  | -2.76 | 0.006 | -1.71832             | -.2921935 |
| 4                  | .0005817  | .6255201  | 0.00  | 0.999 | -1.225415            | 1.226578  |

```

6 | -.6700369 .4032638 -1.66 0.097 -1.460419 .1203456
7 | -.2548409 .5454361 -0.47 0.640 -1.323876 .8141942
8 | -.7883677 .5567114 -1.42 0.157 -1.879502 .3027665
9 | -1.165349 .6455512 -1.81 0.071 -2.430606 .0999081
10 | -1.297616 .8035829 -1.61 0.106 -2.872609 .277378
11 | -1.268936 .7815018 -1.62 0.104 -2.800651 .2627798
12 | -.9345654 .68327 -1.37 0.171 -2.27375 .4046191
|
OnlineAge | .0009217 .0016597 0.56 0.579 -.0023313 .0041747

```

. Chi-squared test for master\_on\_line

chi2( 10) = 14.66

Prob > chi2 = 0.1448

. Chi-squared test for OnlineAge

chi2( 1) = 0.31

Prob > chi2 = 0.5787

#### INTERACTION WITH YEAR

```

-----
|          Robust
divorced_separated |   Coef. Std. Err.   z   P>|z|   [95% Conf. Interval]
-----+-----
master_on_line |
2 | -1.479243 .7537768 -1.96 0.050 -2.956618 -.0018675
3 | -.9114113 .3577692 -2.55 0.011 -1.612626 -.2101965
4 | .1569915 .5978079 0.26 0.793 -1.01469 1.328673
6 | -.3824381 .3683952 -1.04 0.299 -1.104479 .3396033
7 | .082462 .5298344 0.16 0.876 -.9559943 1.120918
8 | -.4041688 .525685 -0.77 0.442 -1.434493 .6261549
9 | -.7264847 .5888288 -1.23 0.217 -1.880568 .4275985
10 | -.8123547 .7428301 -1.09 0.274 -2.268275 .6435656
11 | -.7191956 .7031419 -1.02 0.306 -2.097328 .6589371
12 | -.3249587 .5858297 -0.55 0.579 -1.473164 .8232464
|
OnlineYear | -.0035138 .0088381 -0.40 0.691 -.0208362 .0138086

```

. Chi-squared test for master\_on\_line

chi2( 10) = 13.60

Prob > chi2 = 0.1919

. Chi-squared test for OnlineYear

( 1) [divorced\_separated]OnlineYear = 0

chi2( 1) = 0.16  
 Prob > chi2 = 0.6909

#### INTERACTION WITH GENDER

|                    |           | Robust    |       |       |                      |           |  |
|--------------------|-----------|-----------|-------|-------|----------------------|-----------|--|
| divorced_separated | Coef.     | Std. Err. | z     | P> z  | [95% Conf. Interval] |           |  |
| -----+-----        |           |           |       |       |                      |           |  |
| master_on_line     |           |           |       |       |                      |           |  |
| 2                  | -1.560791 | .7844598  | -1.99 | 0.047 | -3.098303            | -.0232777 |  |
| 3                  | -1.047743 | .3808227  | -2.75 | 0.006 | -1.794141            | -.3013438 |  |
| 4                  | -.0439066 | .602327   | -0.07 | 0.942 | -1.224446            | 1.136633  |  |
| 6                  | -.7219548 | .45424    | -1.59 | 0.112 | -1.612249            | .1683394  |  |
| 7                  | -.3165345 | .6061918  | -0.52 | 0.602 | -1.504649            | .8715796  |  |
| 8                  | -.8711726 | .6178352  | -1.41 | 0.159 | -2.082107            | .3397621  |  |
| 9                  | -1.256725 | .6783237  | -1.85 | 0.064 | -2.586215            | .0727649  |  |
| 10                 | -1.401081 | .829892   | -1.69 | 0.091 | -3.027639            | .2254779  |  |
| 11                 | -1.391572 | .8188138  | -1.70 | 0.089 | -2.996417            | .2132741  |  |
| 12                 | -1.056924 | .7671325  | -1.38 | 0.168 | -2.560476            | .4466285  |  |
|                    |           |           |       |       |                      |           |  |
| OnlineGender       | .0303143  | .0386981  | 0.78  | 0.433 | -.0455325            | .1061611  |  |

. Chi-squared test for master\_on\_line

chi2( 10) = 13.97  
 Prob > chi2 = 0.1746

. Chi-squared test for OnlineGender

chi2( 1) = 0.61  
 Prob > chi2 = 0.4334

#### INTERACTION WITH ETHNICITY

|                    |           | Robust    |       |       |                      |           |  |
|--------------------|-----------|-----------|-------|-------|----------------------|-----------|--|
| divorced_separated | Coef.     | Std. Err. | z     | P> z  | [95% Conf. Interval] |           |  |
| -----+-----        |           |           |       |       |                      |           |  |
| master_on_line     |           |           |       |       |                      |           |  |
| 2                  | -2.278605 | .8591024  | -2.65 | 0.008 | -3.962414            | -.5947949 |  |
| 3                  | -.8358687 | .419596   | -1.99 | 0.046 | -1.658262            | -.0134755 |  |
| 4                  | .2461564  | .6246971  | 0.39  | 0.694 | -.9782275            | 1.47054   |  |
| 6                  | -.4468638 | .3596481  | -1.24 | 0.214 | -1.151761            | .2580336  |  |
| 7                  | -.5420701 | .5628045  | -0.96 | 0.335 | -1.645147            | .5610065  |  |

|                                        |  |            |          |       |       |           |           |
|----------------------------------------|--|------------|----------|-------|-------|-----------|-----------|
| 8                                      |  | -0.8477949 | .5473612 | -1.55 | 0.121 | -1.920603 | .2250135  |
| 9                                      |  | -1.273602  | .5167164 | -2.46 | 0.014 | -2.286347 | -.2608563 |
| 10                                     |  | -1.317855  | .7320143 | -1.80 | 0.072 | -2.752577 | .1168665  |
| 11                                     |  | -1.194273  | .5804967 | -2.06 | 0.040 | -2.332026 | -.0565208 |
| 12                                     |  | -.6575791  | .331039  | -1.99 | 0.047 | -1.306404 | -.0087545 |
|                                        |  |            |          |       |       |           |           |
|                                        |  |            |          |       |       |           |           |
| master_on_line*new_ethnicity_breakdown |  |            |          |       |       |           |           |
| 14                                     |  | 0          | (empty)  |       |       |           |           |
| 22                                     |  | 0          | (empty)  |       |       |           |           |
| 23                                     |  | 3.03068    | 1.483316 | 2.04  | 0.041 | .1234343  | 5.937925  |
| 24                                     |  | 0          | (empty)  |       |       |           |           |
| 25                                     |  | 0          | (empty)  |       |       |           |           |
| 32                                     |  | -1.079772  | 1.628243 | -0.66 | 0.507 | -4.271071 | 2.111526  |
| 33                                     |  | -.2813666  | 1.111699 | -0.25 | 0.800 | -2.460257 | 1.897524  |
| 34                                     |  | 1.169604   | 1.129672 | 1.04  | 0.301 | -1.044513 | 3.383721  |
| 35                                     |  | -.7796763  | 1.368045 | -0.57 | 0.569 | -3.460994 | 1.901642  |
| 42                                     |  | 0          | (empty)  |       |       |           |           |
| 43                                     |  | 0          | (empty)  |       |       |           |           |
| 44                                     |  | .9294776   | 1.45446  | 0.64  | 0.523 | -1.921212 | 3.780167  |
| 45                                     |  | 0          | (empty)  |       |       |           |           |
| 62                                     |  | -.9893921  | 1.540488 | -0.64 | 0.521 | -4.008693 | 2.029909  |
| 63                                     |  | .6320567   | .8405765 | 0.75  | 0.452 | -1.015443 | 2.279556  |
| 64                                     |  | 0          | (empty)  |       |       |           |           |
| 65                                     |  | -2.225437  | 1.057341 | -2.10 | 0.035 | -4.297787 | -.1530864 |
| 72                                     |  | -.4514709  | 1.866969 | -0.24 | 0.809 | -4.110663 | 3.207721  |
| 73                                     |  | 2.33332    | 1.095287 | 2.13  | 0.033 | .1865968  | 4.480043  |
| 74                                     |  | 2.209502   | 1.553062 | 1.42  | 0.155 | -.8344428 | 5.253447  |
| 75                                     |  | -.4056951  | 1.344037 | -0.30 | 0.763 | -3.039959 | 2.228569  |
| 82                                     |  | .8236512   | 2.036457 | 0.40  | 0.686 | -3.16773  | 4.815033  |
| 83                                     |  | .7776474   | 1.116397 | 0.70  | 0.486 | -1.410451 | 2.965746  |
| 84                                     |  | 0          | (empty)  |       |       |           |           |
| 85                                     |  | 1.042129   | 1.348333 | 0.77  | 0.440 | -1.600555 | 3.684814  |
| 92                                     |  | .3102613   | 1.857103 | 0.17  | 0.867 | -3.329594 | 3.950117  |
| 93                                     |  | 1.405513   | 1.204412 | 1.17  | 0.243 | -.9550918 | 3.766117  |
| 94                                     |  | .78639     | 1.353642 | 0.58  | 0.561 | -1.8667   | 3.43948   |
| 95                                     |  | .1973394   | 1.359687 | 0.15  | 0.885 | -2.467598 | 2.862277  |
| 102                                    |  | 0          | (empty)  |       |       |           |           |
| 103                                    |  | 0          | (empty)  |       |       |           |           |
| 104                                    |  | 0          | (empty)  |       |       |           |           |
| 105                                    |  | 2.948726   | 2.003605 | 1.47  | 0.141 | -.9782669 | 6.87572   |
| 112                                    |  | -.0813586  | 1.989913 | -0.04 | 0.967 | -3.981517 | 3.8188    |
| 113                                    |  | 1.646736   | 1.40715  | 1.17  | 0.242 | -1.111227 | 4.404698  |
| 114                                    |  | 0          | (empty)  |       |       |           |           |
| 115                                    |  | -1.648122  | 1.687238 | -0.98 | 0.329 | -4.955047 | 1.658803  |
| 122                                    |  | -1.279114  | 1.494561 | -0.86 | 0.392 | -4.208399 | 1.650172  |

|      |             |          |       |       |           |          |
|------|-------------|----------|-------|-------|-----------|----------|
| 12 3 | 1.647833    | .7541837 | 2.18  | 0.029 | .1696606  | 3.126006 |
| 12 4 | 0 (omitted) |          |       |       |           |          |
| 12 5 | -1.037178   | .9811952 | -1.06 | 0.290 | -2.960285 | .8859295 |
|      |             |          |       |       |           |          |

. Chi-squared test for master\_on\_line

chi2( 10) = 17.20  
 Prob > chi2 = 0.0700

. Chi-squared test for master\_on\_line\*new\_ethnicity\_breakdown

chi2( 27) = 38.09  
 Prob > chi2 = 0.0764

#### INTERACTION WITH EDUCATION

| -----                                  |             |           |       |       |                      |           |
|----------------------------------------|-------------|-----------|-------|-------|----------------------|-----------|
|                                        |             | Robust    |       |       |                      |           |
| divorced_separated                     | Coef.       | Std. Err. | z     | P> z  | [95% Conf. Interval] |           |
| -----+-----                            |             |           |       |       |                      |           |
| master_on_line                         |             |           |       |       |                      |           |
| 2                                      | .5120187    | 1.209449  | 0.42  | 0.672 | -1.858458            | 2.882496  |
| 3                                      | -1.871815   | .7574547  | -2.47 | 0.013 | -3.356399            | -.3872311 |
| 4                                      | .8057406    | .830623   | 0.97  | 0.332 | -.8222505            | 2.433732  |
| 6                                      | .0212679    | .5711674  | 0.04  | 0.970 | -1.0982              | 1.140735  |
| 7                                      | .6173077    | .7452752  | 0.83  | 0.408 | -.8434049            | 2.07802   |
| 8                                      | -.8466321   | 1.038184  | -0.82 | 0.415 | -2.881435            | 1.188171  |
| 9                                      | -2.306602   | .9465873  | -2.44 | 0.015 | -4.161879            | -.4513252 |
| 10                                     | -1.652213   | .8266047  | -2.00 | 0.046 | -3.272329            | -.0320979 |
| 11                                     | -.6690365   | .9213702  | -0.73 | 0.468 | -2.474889            | 1.136816  |
| 12                                     | -.7991372   | .5671297  | -1.41 | 0.159 | -1.910691            | .3124166  |
|                                        |             |           |       |       |                      |           |
| master_on_line*new_education_breakdown |             |           |       |       |                      |           |
| 2 1                                    | 0 (empty)   |           |       |       |                      |           |
| 2 2                                    | 0 (empty)   |           |       |       |                      |           |
| 2 3                                    | -.8960304   | 1.522184  | -0.59 | 0.556 | -3.879456            | 2.087395  |
| 2 4                                    | 0 (omitted) |           |       |       |                      |           |
| 3 2                                    | -.4828259   | 1.016874  | -0.47 | 0.635 | -2.475862            | 1.51021   |
| 3 3                                    | 1.203737    | .9053971  | 1.33  | 0.184 | -.5708093            | 2.978282  |
| 3 4                                    | 3.683374    | 1.196696  | 3.08  | 0.002 | 1.337894             | 6.028855  |
| 4 2                                    | -.1197526   | 1.334852  | -0.09 | 0.929 | -2.736014            | 2.496509  |
| 4 3                                    | -3.055673   | 1.382834  | -2.21 | 0.027 | -5.765978            | -.3453686 |
| 4 4                                    | -.8524033   | 1.524185  | -0.56 | 0.576 | -3.839752            | 2.134945  |
| 6 2                                    | -1.172684   | .850951   | -1.38 | 0.168 | -2.840517            | .4951498  |
| 6 3                                    | -.6505088   | .7507466  | -0.87 | 0.386 | -2.121945            | .8209275  |
| 6 4                                    | .3276989    | 1.009149  | 0.32  | 0.745 | -1.650197            | 2.305595  |

```

7 2 | -1.527973 1.114317 -1.37 0.170 -3.711994 .6560481
7 3 | -1.31552 1.158257 -1.14 0.256 -3.585661 .9546214
7 4 | 2.005294 1.339783 1.50 0.134 -.6206325 4.63122
8 2 | .9580326 1.256093 0.76 0.446 -1.503864 3.419929
8 3 | -.3979448 1.207101 -0.33 0.742 -2.763819 1.967929
8 4 | 1.581234 1.676245 0.94 0.346 -1.704147 4.866615
9 2 | 1.733736 1.288757 1.35 0.179 -.7921817 4.259654
9 3 | 1.439719 1.178216 1.22 0.222 -.869541 3.74898
9 4 | 3.169453 1.388741 2.28 0.022 .447571 5.891335
10 1 | 0 (empty)
10 2 | 1.758006 1.174657 1.50 0.134 -.5442797 4.060291
10 3 | 0 (omitted)
10 4 | 0 (empty)
11 2 | -.1191737 1.316247 -0.09 0.928 -2.69897 2.460622
11 3 | -1.55158 1.193564 -1.30 0.194 -3.890922 .7877624
11 4 | .8671283 1.56134 0.56 0.579 -2.193042 3.927299
12 2 | -1.301805 .7453231 -0.17 0.861 -1.590987 1.330626
12 3 | .3317184 .7336394 0.45 0.651 -1.106188 1.769625
12 4 | 1.629095 .9910254 1.64 0.100 -.3132791 3.571469

```

. Chi-squared test for master\_on\_line

```

chi2( 10) = 26.70
Prob > chi2 = 0.0029

```

. Chi-squared test for master\_on\_line\*new\_education\_breakdown

```

chi2( 26) = 54.12
Prob > chi2 = 0.0010

```

#### INTERACTION WITH RELIGION

```

-----
|          Robust
divorced_separated |  Coef. Std. Err.  z  P>|z|  [95% Conf. Interval]
-----+-----
master_on_line |
2 | -.1155312 .878774 -0.13 0.895 -1.837897 1.606834
3 | -2.272267 .8620148 -2.64 0.008 -3.961785 -.5827489
4 | .4493932 1.141952 0.39 0.694 -1.788792 2.687579
6 | -1.266665 .636075 -1.99 0.046 -2.513349 -.0199809
7 | .674245 .7931503 0.85 0.395 -.880301 2.228791
8 | -3.146097 1.179637 -2.67 0.008 -5.458143 -.834052
9 | -.7379336 .9410682 -0.78 0.433 -2.582393 1.106526
10 | .9235704 1.070189 0.86 0.388 -1.173961 3.021102
11 | -1.710228 1.06686 -1.60 0.109 -3.801235 .3807795

```

|                                       |  |             |          |       |       |            |            |
|---------------------------------------|--|-------------|----------|-------|-------|------------|------------|
| 12                                    |  | -0.8561347  | .6120241 | -1.40 | 0.162 | -2.05568   | .3434105   |
|                                       |  |             |          |       |       |            |            |
| master_on_line*new_religion_breakdown |  |             |          |       |       |            |            |
| 14                                    |  | 0 (empty)   |          |       |       |            |            |
| 21                                    |  | 0 (empty)   |          |       |       |            |            |
| 22                                    |  | 0 (omitted) |          |       |       |            |            |
| 23                                    |  | 0 (empty)   |          |       |       |            |            |
| 24                                    |  | 0 (empty)   |          |       |       |            |            |
| 25                                    |  | 0 (empty)   |          |       |       |            |            |
| 26                                    |  | 0 (empty)   |          |       |       |            |            |
| 27                                    |  | 0 (empty)   |          |       |       |            |            |
| 32                                    |  | 1.098136    | 1.070422 | 1.03  | 0.305 | -0.9998537 | 3.196125   |
| 33                                    |  | -0.3404931  | 1.707072 | -0.20 | 0.842 | -3.686293  | 3.005307   |
| 34                                    |  | 0 (empty)   |          |       |       |            |            |
| 35                                    |  | 2.549383    | 1.3586   | 1.88  | 0.061 | -0.113424  | 5.212191   |
| 36                                    |  | 2.056211    | 1.180246 | 1.74  | 0.081 | -0.2570285 | 4.36945    |
| 37                                    |  | 2.731957    | 1.242957 | 2.20  | 0.028 | .2958049   | 5.168109   |
| 42                                    |  | -0.5115241  | 1.43668  | -0.36 | 0.722 | -3.327366  | 2.304317   |
| 43                                    |  | 0 (empty)   |          |       |       |            |            |
| 44                                    |  | 0 (empty)   |          |       |       |            |            |
| 45                                    |  | 0 (empty)   |          |       |       |            |            |
| 46                                    |  | -0.0261645  | 1.40522  | -0.02 | 0.985 | -2.780345  | 2.728015   |
| 47                                    |  | 0 (empty)   |          |       |       |            |            |
| 62                                    |  | 1.074649    | .8456852 | 1.27  | 0.204 | -0.582864  | 2.732161   |
| 63                                    |  | -1.292263   | 1.551664 | -0.83 | 0.405 | -4.333469  | 1.748943   |
| 64                                    |  | 0 (empty)   |          |       |       |            |            |
| 65                                    |  | 1.730789    | 1.222218 | 1.42  | 0.157 | -0.6647129 | 4.126292   |
| 66                                    |  | .5647508    | .8525926 | 0.66  | 0.508 | -1.1063    | 2.235802   |
| 67                                    |  | 1.907387    | 1.015607 | 1.88  | 0.060 | -0.0831658 | 3.89794    |
| 72                                    |  | -0.3774104  | 1.07771  | -0.35 | 0.726 | -2.489683  | 1.734862   |
| 73                                    |  | 0 (empty)   |          |       |       |            |            |
| 74                                    |  | 0 (empty)   |          |       |       |            |            |
| 75                                    |  | -1.941225   | 1.752994 | -1.11 | 0.268 | -5.37703   | 1.49458    |
| 76                                    |  | -2.889281   | 1.412812 | -2.05 | 0.041 | -5.658342  | -1.1202196 |
| 77                                    |  | -0.0740209  | 1.371173 | -0.05 | 0.957 | -2.76147   | 2.613429   |
| 82                                    |  | 2.984839    | 1.402742 | 2.13  | 0.033 | .2355148   | 5.734164   |
| 83                                    |  | 0 (empty)   |          |       |       |            |            |
| 84                                    |  | 4.542269    | 1.541936 | 2.95  | 0.003 | 1.52013    | 7.564407   |
| 85                                    |  | 5.421614    | 1.653557 | 3.28  | 0.001 | 2.180702   | 8.662525   |
| 86                                    |  | 1.81266     | 1.421448 | 1.28  | 0.202 | -0.973327  | 4.598646   |
| 87                                    |  | 0 (empty)   |          |       |       |            |            |
| 92                                    |  | -0.6886292  | 1.23848  | -0.56 | 0.578 | -3.116005  | 1.738747   |
| 93                                    |  | -0.748651   | 1.707489 | -0.44 | 0.661 | -4.095268  | 2.597965   |
| 94                                    |  | 0 (empty)   |          |       |       |            |            |
| 95                                    |  | .1914058    | 1.707051 | 0.11  | 0.911 | -3.154352  | 3.537164   |
| 96                                    |  | -0.7481152  | 1.19071  | -0.63 | 0.530 | -3.081863  | 1.585633   |

```

9 7 | 1.109142 1.626885 0.68 0.495 -2.079495 4.297779
10 1 | 0 (empty)
10 2 | 0 (empty)
10 3 | 0 (empty)
10 4 | 0 (empty)
10 5 | -.0875957 1.826634 -0.05 0.962 -3.667733 3.492542
10 6 | -1.253164 1.676342 -0.75 0.455 -4.538734 2.032407
10 7 | 0 (omitted)
11 2 | 1.482664 1.337924 1.11 0.268 -1.139619 4.104947
11 3 | 0 (empty)
11 4 | 0 (empty)
11 5 | 1.481078 1.760388 0.84 0.400 -1.969218 4.931375
11 6 | .1658987 1.587597 0.10 0.917 -2.945734 3.277532
11 7 | .6055246 1.556905 0.39 0.697 -2.445953 3.657002
12 2 | .5204677 .8030636 0.65 0.517 -1.053508 2.094444
12 3 | -1.215503 1.232016 -0.99 0.324 -3.630209 1.199204
12 4 | 0 (omitted)
12 5 | 1.823581 1.188858 1.53 0.125 -5.065383 4.153701
12 6 | -1.256667 .816244 -0.15 0.878 -1.725475 1.474142
12 7 | -.0377553 1.053 -0.04 0.971 -2.101597 2.026086

```

. Chi-squared test for master\_on\_line

```

chi2( 10) = 23.83
Prob > chi2 = 0.0081

```

. Chi-squared test for master\_on\_line\*new\_religion\_breakdown

```

chi2( 36) = 52.75
Prob > chi2 = 0.0354

```

#### INTERACTION WITH EMPLOYMENT

```

-----
|               Robust
divorced_separated | Coef. Std. Err.  z  P>|z|  [95% Conf. Interval]
-----+-----
master_on_line |
2 | -.5432671 1.244898 -0.44 0.663 -2.983223 1.896688
3 | -.8823121 .9178697 -0.96 0.336 -2.681304 .9166794
4 | .3415985 1.111919 0.31 0.759 -1.837722 2.520919
6 | 1.057348 .8895279 1.19 0.235 -.6860948 2.800791
7 | .8710152 1.254049 0.69 0.487 -1.586875 3.328906
8 | -2.364442 1.318188 -1.79 0.073 -4.948043 .2191584
9 | -2.209582 1.293067 -1.71 0.087 -4.743947 .3247829
10 | -.8082354 1.446245 -0.56 0.576 -3.642825 2.026354

```



|                                         |  |             |          |       |       |           |           |
|-----------------------------------------|--|-------------|----------|-------|-------|-----------|-----------|
| 11                                      |  | .5434626    | .9501148 | 0.57  | 0.567 | -1.318728 | 2.405653  |
| 12                                      |  | .1749009    | .7645612 | 0.23  | 0.819 | -1.323612 | 1.673413  |
|                                         |  |             |          |       |       |           |           |
|                                         |  |             |          |       |       |           |           |
| master_on_line*new_employment_breakdown |  |             |          |       |       |           |           |
| 2 0                                     |  | 0 (empty)   |          |       |       |           |           |
| 2 1                                     |  | 0 (empty)   |          |       |       |           |           |
| 2 2                                     |  | 0 (empty)   |          |       |       |           |           |
| 2 3                                     |  | .9301145    | 1.849193 | 0.50  | 0.615 | -2.694237 | 4.554466  |
| 2 4                                     |  | 0 (omitted) |          |       |       |           |           |
| 3 1                                     |  | -.0458546   | 1.034118 | -0.04 | 0.965 | -2.072688 | 1.980979  |
| 3 2                                     |  | -1.225367   | 1.805996 | -0.68 | 0.497 | -4.765054 | 2.31432   |
| 3 3                                     |  | -.6489337   | 1.257742 | -0.52 | 0.606 | -3.114063 | 1.816195  |
| 3 4                                     |  | .6165868    | 1.147287 | 0.54  | 0.591 | -1.632054 | 2.865227  |
| 4 0                                     |  | 0 (empty)   |          |       |       |           |           |
| 4 1                                     |  | -.297723    | 1.32777  | -0.22 | 0.823 | -2.900103 | 2.304658  |
| 4 2                                     |  | 0 (empty)   |          |       |       |           |           |
| 4 3                                     |  | 0 (empty)   |          |       |       |           |           |
| 4 4                                     |  | 0 (omitted) |          |       |       |           |           |
| 6 1                                     |  | -1.690124   | .9856619 | -1.71 | 0.086 | -3.621986 | .2417375  |
| 6 2                                     |  | -1.308935   | 1.662421 | -0.79 | 0.431 | -4.56722  | 1.94935   |
| 6 3                                     |  | -2.071065   | 1.10028  | -1.88 | 0.060 | -4.227574 | .0854448  |
| 6 4                                     |  | -1.197326   | 1.102609 | -1.09 | 0.278 | -3.3584   | .9637488  |
| 7 1                                     |  | -2.931716   | 1.462181 | -2.01 | 0.045 | -5.797538 | -.0658927 |
| 7 2                                     |  | 0 (empty)   |          |       |       |           |           |
| 7 3                                     |  | -.6390644   | 1.571996 | -0.41 | 0.684 | -3.72012  | 2.441991  |
| 7 4                                     |  | .9016465    | 1.488675 | 0.61  | 0.545 | -2.016103 | 3.819396  |
| 8 1                                     |  | 1.244092    | 1.491233 | 0.83  | 0.404 | -1.678671 | 4.166856  |
| 8 2                                     |  | 0 (empty)   |          |       |       |           |           |
| 8 3                                     |  | 2.123563    | 1.542725 | 1.38  | 0.169 | -.9001228 | 5.14725   |
| 8 4                                     |  | 3.678167    | 1.527826 | 2.41  | 0.016 | .683683   | 6.672652  |
| 9 1                                     |  | 1.041887    | 1.437139 | 0.72  | 0.468 | -1.774854 | 3.858628  |
| 9 2                                     |  | 1.48935     | 2.039143 | 0.73  | 0.465 | -2.507297 | 5.485996  |
| 9 3                                     |  | .0075643    | 1.581276 | 0.00  | 0.996 | -3.091679 | 3.106807  |
| 9 4                                     |  | 3.063142    | 1.569563 | 1.95  | 0.051 | -.0131461 | 6.139429  |
| 10 1                                    |  | -1.707569   | 1.807927 | -0.94 | 0.345 | -5.25104  | 1.835903  |
| 10 2                                    |  | 2.162583    | 2.059509 | 1.05  | 0.294 | -1.873981 | 6.199147  |
| 10 3                                    |  | 0 (empty)   |          |       |       |           |           |
| 10 4                                    |  | 0 (empty)   |          |       |       |           |           |
| 11 0                                    |  | 0 (empty)   |          |       |       |           |           |
| 11 1                                    |  | -1.241603   | 1.185765 | -1.05 | 0.295 | -3.56566  | 1.082454  |
| 11 2                                    |  | -1.266483   | 1.66807  | -0.76 | 0.448 | -4.53584  | 2.002873  |
| 11 3                                    |  | -3.735385   | 1.660445 | -2.25 | 0.024 | -6.989798 | -         |
| .4809727                                |  |             |          |       |       |           |           |
| 11 4                                    |  | 0 (omitted) |          |       |       |           |           |
| 12 1                                    |  | -.7658766   | .864734  | -0.89 | 0.376 | -2.460724 | .9289709  |

```

12 2 | -1.506253 1.439431 -1.05 0.295 -4.327486 1.31498
12 3 | -1.279478 .9944172 -1.29 0.198 -3.2285 .6695435
12 4 | -.4485284 .9977631 -0.45 0.653 -2.404108

```

1.507051

. Chi-squared test for master\_on\_line

```

chi2( 10) = 15.14
Prob > chi2 = 0.1271

```

. Chi-squared test for master\_on\_line\*new\_employment\_breakdown

```

chi2( 29) = 54.82
Prob > chi2 = 0.0026

```

Does meeting in different OFFLINE VENUES (variable name "master\_off\_line") predict marital breakup?

```

-----
                |      Robust
divorced_separated |  Coef. Std. Err.  z  P>|z|  [95% Conf. Interval]
-----+-----
master_off_line |
13 | .2059612 .148231  1.39 0.165  -.0845662 .4964887
14 | -.1945667 .1747731 -1.11 0.266  -.5371157 .1479823
15 | -.0208028 .1915321 -0.11 0.914  -.3961989 .3545933
16 | -.048771 .1699595 -0.29 0.774  -.3818854 .2843435
17 | .0712877 .2830609  0.25 0.801  -.4835015 .6260768
18 | .0760165 .1819727  0.42 0.676  -.2806434 .4326764
19 | -.3142725 .236845 -1.33 0.185  -.7784803 .1499352
20 | .0501551 .3461423  0.14 0.885  -.6282713 .7285815
21 | .097044 .1920369  0.51 0.613  -.2793415 .4734295
                |

```

. Chi-squared test for master\_off\_line

```

chi2( 9) = 8.64
Prob > chi2 = 0.4708

```

INTERACTION WITH AGE

```

-----
                |      Robust
divorced_separated |  Coef. Std. Err.  z  P>|z|  [95% Conf. Interval]
-----+-----
master_off_line |

```

```

13 | .3251993 .166003 1.96 0.050 -.0001606 .6505593
14 | .0506033 .2177859 0.23 0.816 -.3762491 .4774558
15 | .3024244 .2552224 1.18 0.236 -.1978023 .8026512
16 | .3791965 .28265 1.34 0.180 -.1747873 .9331802
17 | .6011639 .3875086 1.55 0.121 -.1583391 1.360667
18 | .6961328 .3609424 1.93 0.054 -.0113013 1.403567
19 | .4000406 .415819 0.96 0.336 -.4149497 1.215031
20 | .9019621 .5890527 1.53 0.126 -.2525599 2.056484
21 | 1.086548 .5355859 2.03 0.042 .0368187 2.136277
|
OfflineAge | -.0027056 .0014546 -1.86 0.063 -.0055566 .0001455

```

. Chi-squared test for master\_off\_line

```

chi2( 9) = 11.01
Prob > chi2 = 0.2753

```

. Chi-squared test for OfflineAge

```

chi2( 1) = 3.46
Prob > chi2 = 0.0629

```

#### INTERACTION WITH YEAR

```

-----
|          Robust
divorced_separated |   Coef. Std. Err.   z   P>|z|   [95% Conf. Interval]
-----+-----
master_off_line |
13 | .2152912 .1557443  1.38 0.167  -.0899621  .5205445
14 | -.1770822 .1978201 -0.90 0.371  -.5648024  .2106381
15 | .0047826 .2335513  0.02 0.984  -.4529696  .4625349
16 | -.0147492 .2463847 -0.06 0.952  -.4976544  .468156
17 | .1133878 .357532  0.32 0.751  -.5873621  .8141377
18 | .1265379 .3114139  0.41 0.684  -.4838221  .7368979
19 | -.2555389 .4116773 -0.62 0.535  -1.062412  .5513339
20 | .1180587 .5041612  0.23 0.815  -.870079  1.106196
21 | .1727399 .4206233  0.41 0.681  -.6516667  .9971466
|
OfflineYear | -.0013637 .0074319 -0.18 0.854  -.0159299  .0132025

```

. Chi-squared test for master\_off\_line

```

chi2( 9) = 8.72
Prob > chi2 = 0.4638

```

. Chi-squared test for OfflineYear

chi2( 1) = 0.03  
 Prob > chi2 = 0.8544

#### INTERACTION WITH GENDER

|                    |           | Robust    |       |       |                      |          |  |
|--------------------|-----------|-----------|-------|-------|----------------------|----------|--|
| divorced_separated | Coef.     | Std. Err. | z     | P> z  | [95% Conf. Interval] |          |  |
| -----+-----        |           |           |       |       |                      |          |  |
| master_off_line    |           |           |       |       |                      |          |  |
| 13                 | .2238149  | .1580573  | 1.42  | 0.157 | -.0859717            | .5336014 |  |
| 14                 | -.1579669 | .2035628  | -0.78 | 0.438 | -.5569427            | .2410089 |  |
| 15                 | .0337786  | .2463131  | 0.14  | 0.891 | -.4489861            | .5165434 |  |
| 16                 | .0241914  | .2679462  | 0.09  | 0.928 | -.5009736            | .5493563 |  |
| 17                 | .1635064  | .3870627  | 0.42  | 0.673 | -.5951225            | .9221354 |  |
| 18                 | .184542   | .3580149  | 0.52  | 0.606 | -.5171544            | .8862383 |  |
| 19                 | -.1880159 | .4233311  | -0.44 | 0.657 | -1.01773             | .6416978 |  |
| 20                 | .1965151  | .5781816  | 0.34  | 0.734 | -.9367               | 1.32973  |  |
| 21                 | .2601925  | .5140616  | 0.51  | 0.613 | -.7473496            | 1.267735 |  |
|                    |           |           |       |       |                      |          |  |
| OfflineGender      | -.0121659 | .0324266  | -0.38 | 0.708 | -.0757209            | .0513891 |  |

. Chi-squared test for master\_off\_line

chi2( 9) = 8.53  
 Prob > chi2 = 0.4822

. Chi-squared test for OfflineGender

chi2( 1) = 0.14  
 Prob > chi2 = 0.7075

#### INTERACTION WITH ETHNICITY

|                    |           | Robust    |       |       |                      |          |  |
|--------------------|-----------|-----------|-------|-------|----------------------|----------|--|
| divorced_separated | Coef.     | Std. Err. | z     | P> z  | [95% Conf. Interval] |          |  |
| -----+-----        |           |           |       |       |                      |          |  |
| master_off_line    |           |           |       |       |                      |          |  |
| 13                 | .1774134  | .167481   | 1.06  | 0.289 | -.1508434            | .5056702 |  |
| 14                 | -.2708811 | .1961527  | -1.38 | 0.167 | -.6553332            | .1135711 |  |
| 15                 | .1749812  | .2246114  | 0.78  | 0.436 | -.2652489            | .6152114 |  |
| 16                 | .0267802  | .1861825  | 0.14  | 0.886 | -.3381309            | .3916913 |  |
| 17                 | -.0372971 | .3182535  | -0.12 | 0.907 | -.6610625            | .5864683 |  |

|                                         |  |            |          |       |       |           |          |
|-----------------------------------------|--|------------|----------|-------|-------|-----------|----------|
| 18                                      |  | -.2582401  | .2240296 | -1.15 | 0.249 | -.6973299 | .1808498 |
| 19                                      |  | -.1049095  | .2829127 | -0.37 | 0.711 | -.6594082 | .4495892 |
| 20                                      |  | -.14547    | .3220511 | -0.45 | 0.651 | -.7766787 | .4857386 |
| 21                                      |  | .1334661   | .2225482 | 0.60  | 0.549 | -.3027204 | .5696526 |
|                                         |  |            |          |       |       |           |          |
| master_off_line*new_ethnicity_breakdown |  |            |          |       |       |           |          |
| 13 2                                    |  | -.2758284  | .4620299 | -0.60 | 0.551 | -1.18139  | .6297335 |
| 13 3                                    |  | .2918855   | .5303347 | 0.55  | 0.582 | -.7475515 | 1.331323 |
| 13 4                                    |  | .5349915   | .7751527 | 0.69  | 0.490 | -.9842799 | 2.054263 |
| 13 5                                    |  | .6802296   | .7455852 | 0.91  | 0.362 | -.7810904 | 2.14155  |
| 14 2                                    |  | -1.110225  | .6334147 | -1.75 | 0.080 | -2.351695 |          |
| .1312448                                |  |            |          |       |       |           |          |
| 14 3                                    |  | .6824274   | .5318379 | 1.28  | 0.199 | -.3599557 | 1.724811 |
| 14 4                                    |  | .8144388   | .7279061 | 1.12  | 0.263 | -.6122309 | 2.241108 |
| 14 5                                    |  | .0255706   | .6714695 | 0.04  | 0.970 | -1.290485 | 1.341627 |
| 15 2                                    |  | -.795082   | .577853  | -1.38 | 0.169 | -1.927653 | .337489  |
| 15 3                                    |  | -.7168881  | .7250022 | -0.99 | 0.323 | -2.137866 | .70409   |
| 15 4                                    |  | .2634658   | .8142741 | 0.32  | 0.746 | -1.332482 | 1.859414 |
| 15 5                                    |  | .0695475   | .751891  | 0.09  | 0.926 | -1.404132 | 1.543227 |
| 16 2                                    |  | -1.1194746 | .6243486 | -0.19 | 0.848 | -1.343175 |          |
| 1.104226                                |  |            |          |       |       |           |          |
| 16 3                                    |  | -.5001378  | .6357891 | -0.79 | 0.431 | -1.746261 | .745986  |
| 16 4                                    |  | .3926663   | 1.201609 | 0.33  | 0.744 | -1.962444 | 2.747777 |
| 16 5                                    |  | .263871    | .6955679 | 0.38  | 0.704 | -1.099417 | 1.627159 |
| 17 2                                    |  | -.2207515  | .8761592 | -0.25 | 0.801 | -1.937992 |          |
| 1.496489                                |  |            |          |       |       |           |          |
| 17 3                                    |  | .772579    | .7761709 | 1.00  | 0.320 | -.748688  | 2.293846 |
| 17 4                                    |  | 0 (empty)  |          |       |       |           |          |
| 17 5                                    |  | 0 (empty)  |          |       |       |           |          |
| 18 2                                    |  | .5455389   | .5262385 | 1.04  | 0.300 | -.4858696 | 1.576947 |
| 18 3                                    |  | 1.039945   | .5535061 | 1.88  | 0.060 | -.0449072 | 2.124797 |
| 18 4                                    |  | 1.312685   | .8432599 | 1.56  | 0.120 | -.3400739 | 2.965444 |
| 18 5                                    |  | .5980309   | .8074597 | 0.74  | 0.459 | -.984561  | 2.180623 |
| 19 2                                    |  | -.7519243  | .5848439 | -1.29 | 0.199 | -1.898197 |          |
| .3943487                                |  |            |          |       |       |           |          |
| 19 3                                    |  | -.7969819  | .6838309 | -1.17 | 0.244 | -2.137266 |          |
| .5433019                                |  |            |          |       |       |           |          |
| 19 4                                    |  | 0 (empty)  |          |       |       |           |          |
| 19 5                                    |  | -.3717579  | .8927495 | -0.42 | 0.677 | -2.121515 |          |
| 1.377999                                |  |            |          |       |       |           |          |
| 20 2                                    |  | 1.373164   | .8688729 | 1.58  | 0.114 | -.3297958 | 3.076123 |
| 20 3                                    |  | 0 (empty)  |          |       |       |           |          |
| 20 4                                    |  | 0 (empty)  |          |       |       |           |          |
| 20 5                                    |  | .2474662   | 1.15173  | 0.21  | 0.830 | -2.009882 | 2.504815 |
| 21 2                                    |  | -.6061554  | .5781301 | -1.05 | 0.294 | -1.73927  | .5269589 |
| 21 3                                    |  | .2904309   | .5984583 | 0.49  | 0.627 | -.8825259 | 1.463388 |

```

21 4 | -.1508096 1.037182 -0.15 0.884 -2.18365 1.882031
21 5 | .7280702 1.006053 0.72 0.469 -1.243758 2.699899

```

. Chi-squared test for master\_off\_line

```

chi2( 9) = 8.00
Prob > chi2 = 0.5341

```

. Chi-squared test for master\_off\_line\*new\_ethnicity\_breakdown

```

chi2( 31) = 31.31
Prob > chi2 = 0.4509

```

#### INTERACTION WITH EDUCATION

```

-----
|               Robust
divorced_separated | Coef. Std. Err.  z  P>|z|  [95% Conf. Interval]
-----+-----
master_off_line |
13 | .0774577 .2921774 0.27 0.791  -.4951995  .6501149
14 | .231175 .3432745 0.67 0.501  -.4416306  .9039806
15 | -.0717947 .3480449 -0.21 0.837  -.7539502  .6103607
16 | -.5128188 .3500964 -1.46 0.143  -1.198995  .1733574
17 | .17695 .5447051 0.32 0.745  -.8906523  1.244552
18 | .0114751 .3399179 0.03 0.973  -.6547517  .677702
19 | -.4748477 .3807611 -1.25 0.212  -1.221126  .2714304
20 | .2380131 .6406476 0.37 0.710  -1.017633  1.493659
21 | -.3145329 .3627645 -0.87 0.386  -1.025538  .3964723
|
master_off_line*new_education_breakdown |
13 2 | .7852653 .4216328 1.86 0.063  -.0411199  1.61165
13 3 | .0446981 .3552907 0.13 0.900  -.6516589  .7410552
13 4 | -.3596828 .4946351 -0.73 0.467  -1.32915  .6097843
14 2 | -.4434584 .6267989 -0.71 0.479  -1.671962
.7850448
14 3 | -.6341988 .4055568 -1.56 0.118  -1.429076
.1606779
14 4 | -.9204465 .5732967 -1.61 0.108  -2.044087
.2031943
15 2 | .2427526 .5627727 0.43 0.666  -.8602616  1.345767
15 3 | -.1138295 .4494117 -0.25 0.800  -.9946602
.7670013
15 4 | .8231516 .6726592 1.22 0.221  -.4952362  2.141539
16 2 | .544598 .530391 1.03 0.305  -.4949493  1.584145
16 3 | .8288017 .4159409 1.99 0.046  .0135726  1.644031

```

```

16 4 | .0745197 .6575697 0.11 0.910 -1.214293 1.363333
17 2 | .679644 .8171429 0.83 0.406 -.9219266 2.281215
17 3 | -.5982027 .6698153 -0.89 0.372 -1.911017
.7146112
17 4 | -.2230582 .784663 -0.28 0.776 -1.760969 1.314853
18 2 | .6810382 .5435167 1.25 0.210 -.3842349 1.746311
18 3 | -.0101599 .4290949 -0.02 0.981 -.8511704
.8308506
18 4 | -.6903631 .6088247 -1.13 0.257 -1.883638
.5029113
19 2 | .7617714 .8355757 0.91 0.362 -.8759267 2.39947
19 3 | -.0922811 .4791383 -0.19 0.847 -1.031375
.8468127
19 4 | .5644562 .6963249 0.81 0.418 -.8003156 1.929228
20 2 | -.7223611 1.149424 -0.63 0.530 -2.975191
1.530469
20 3 | .0204257 .7390673 0.03 0.978 -1.42812 1.468971
20 4 | 0 (empty)
21 2 | .8983709 .6143701 1.46 0.144 -.3057724 2.102514
21 3 | .6672305 .4349444 1.53 0.125 -.1852449 1.519706
21 4 | .2305427 .6080238 0.38 0.705 -.961162 1.422247

```

. Chi-squared test for master\_off\_line

```

chi2( 9) = 7.14
Prob > chi2 = 0.6229

```

. Chi-squared test for master\_off\_line\*new\_education\_breakdown

```

chi2( 26) = 35.21
Prob > chi2 = 0.1072

```

#### INTERACTION WITH RELIGION

```

-----
|               Robust
divorced_separated |   Coef. Std. Err.   z   P>|z|   [95% Conf. Interval]
-----+-----
master_off_line |
13 | .6737131 .40262 1.67 0.094 -.1154076 1.462834
14 | .1898136 .4179779 0.45 0.650 -.629408 1.009035
15 | .3081884 .4823362 0.64 0.523 -.6371731 1.25355
16 | .0273039 .4150301 0.07 0.948 -.7861402 .840748
17 | 1.038759 .85689 1.21 0.225 -.6407151 2.718232
18 | .1816534 .441739 0.41 0.681 -.684139 1.047446
19 | .5876741 .6422021 0.92 0.360 -.671019 1.846367

```

|                  |                        |  |           |          |       |       |           |          |  |
|------------------|------------------------|--|-----------|----------|-------|-------|-----------|----------|--|
|                  | 20                     |  | .4879078  | .9050548 | 0.54  | 0.590 | -1.285967 | 2.261783 |  |
|                  | 21                     |  | .6520104  | .4290271 | 1.52  | 0.129 | -.1888674 | 1.492888 |  |
| master_off_line* | new_religion_breakdown |  |           |          |       |       |           |          |  |
|                  | 13 2                   |  | -.4331697 | .4600278 | -0.94 | 0.346 | -1.334808 | .4684681 |  |
|                  | 13 3                   |  | -.774222  | 1.16973  | -0.66 | 0.508 | -3.06685  | 1.518406 |  |
|                  | 13 4                   |  | -.8443504 | .8179716 | -1.03 | 0.302 | -2.447545 | .7588444 |  |
|                  | 13 5                   |  | -.6319878 | .5200476 | -1.22 | 0.224 | -1.651262 | .3872867 |  |
|                  | 13 6                   |  | -.5113383 | .5600278 | -0.91 | 0.361 | -1.608973 | .586296  |  |
|                  | 13 7                   |  | -.9326277 | .5723065 | -1.63 | 0.103 | -2.054328 | .1890724 |  |
|                  | 14 2                   |  | -.5259099 | .5166688 | -1.02 | 0.309 | -1.538562 | .4867423 |  |
|                  | 14 3                   |  | -1.028494 | 1.099715 | -0.94 | 0.350 | -3.183896 | 1.126908 |  |
|                  | 14 4                   |  | -2.213373 | 1.052449 | -2.10 | 0.035 | -4.276134 | -        |  |
| .1506118         |                        |  |           |          |       |       |           |          |  |
|                  | 14 5                   |  | -.5006963 | .5598862 | -0.89 | 0.371 | -1.598053 | .5966605 |  |
|                  | 14 6                   |  | .1529349  | .5697629 | 0.27  | 0.788 | -.9637798 | 1.26965  |  |
|                  | 14 7                   |  | -.8032171 | .6224001 | -1.29 | 0.197 | -2.023099 | .4166646 |  |
|                  | 15 2                   |  | -.2396362 | .567175  | -0.42 | 0.673 | -1.351279 | .8720063 |  |
|                  | 15 3                   |  | -.0139334 | 1.470093 | -0.01 | 0.992 | -2.895263 | 2.867396 |  |
|                  | 15 4                   |  | -1.423129 | 1.161026 | -1.23 | 0.220 | -3.698699 | .8524402 |  |
|                  | 15 5                   |  | -.8230688 | .657286  | -1.25 | 0.210 | -2.111326 | .4651881 |  |
|                  | 15 6                   |  | -1.08224  | .9538316 | -1.13 | 0.257 | -2.951715 | .7872358 |  |
|                  | 15 7                   |  | -.3017608 | .677424  | -0.45 | 0.656 | -1.629487 | 1.025966 |  |
|                  | 16 2                   |  | .0826842  | .490085  | 0.17  | 0.866 | -.8778646 | 1.043233 |  |
|                  | 16 3                   |  | -1.288443 | 1.420725 | -0.91 | 0.364 | -4.073012 | 1.496127 |  |
|                  | 16 4                   |  | 1.394642  | 1.175494 | 1.19  | 0.235 | -.9092834 | 3.698567 |  |
|                  | 16 5                   |  | .1072228  | .5605152 | 0.19  | 0.848 | -.9913669 | 1.205812 |  |
|                  | 16 6                   |  | -.801483  | .6452543 | -1.24 | 0.214 | -2.066158 | .4631921 |  |
|                  | 16 7                   |  | -.6315616 | .7607796 | -0.83 | 0.406 | -2.122662 | .8595391 |  |
|                  | 17 2                   |  | -1.48603  | .9305487 | -1.60 | 0.110 | -3.309872 | .3378124 |  |
|                  | 17 3                   |  | 1.213034  | 1.530122 | 0.79  | 0.428 | -1.785951 | 4.212018 |  |
|                  | 17 4                   |  | -.7224151 | 1.23669  | -0.58 | 0.559 | -3.146282 | 1.701452 |  |
|                  | 17 5                   |  | -.1470961 | 1.178266 | -0.12 | 0.901 | -2.456455 | 2.162262 |  |
|                  | 17 6                   |  | 1.543635  | 1.326648 | 1.16  | 0.245 | -1.056548 | 4.143817 |  |
|                  | 17 7                   |  | -2.425036 | 1.244902 | -1.95 | 0.051 | -4.864999 | .014927  |  |
|                  | 18 2                   |  | -.1922982 | .5359796 | -0.36 | 0.720 | -1.242799 | .8582025 |  |
|                  | 18 3                   |  | -.3532293 | 1.350471 | -0.26 | 0.794 | -3.000104 | 2.293646 |  |
|                  | 18 4                   |  | .3261928  | 1.000292 | 0.33  | 0.744 | -1.634344 | 2.28673  |  |
|                  | 18 5                   |  | .0985544  | .5810836 | 0.17  | 0.865 | -1.040348 | 1.237457 |  |
|                  | 18 6                   |  | .1056826  | .6722649 | 0.16  | 0.875 | -1.211932 | 1.423298 |  |
|                  | 18 7                   |  | -1.048821 | .7753181 | -1.35 | 0.176 | -2.568416 | .470775  |  |
|                  | 19 2                   |  | -.9435337 | .7191252 | -1.31 | 0.190 | -2.352993 | .4659258 |  |
|                  | 19 3                   |  | -1.020386 | 1.400756 | -0.73 | 0.466 | -3.765817 | 1.725045 |  |
|                  | 19 4                   |  | 0 (empty) |          |       |       |           |          |  |
|                  | 19 5                   |  | -1.207413 | .7612801 | -1.59 | 0.113 | -2.699495 | .2846683 |  |
|                  | 19 6                   |  | -.9918963 | .8473979 | -1.17 | 0.242 | -2.652766 | .6689731 |  |
|                  | 19 7                   |  | -1.608606 | 1.016245 | -1.58 | 0.113 | -3.60041  | .3831982 |  |



```

20 2 | -3.901464 .997495 -0.39 0.696 -2.345201 1.564908
20 3 |      0 (empty)
20 4 |      0 (empty)
20 5 | -1.794301 1.19519 -1.50 0.133 -4.13683 .5482275
20 6 | 1.116003 1.10884 1.01 0.314 -1.057283 3.289289
20 7 | -3.451503 1.345204 -0.26 0.798 -2.981701 2.2914
21 2 | -5.056283 .5119617 -0.99 0.323 -1.509055 .4977982
21 3 | -1.729247 1.115439 -1.55 0.121 -3.915467 .4569732
21 4 | -1.025749 1.193545 -0.86 0.390 -3.365054 1.313557
21 5 | -8.115387 .5942831 -1.37 0.172 -1.976312 .3532347
21 6 | -1.310171 .7362701 -1.78 0.075 -2.753234 .1328917
21 7 | -4.612407 .7691776 -0.60 0.549 -1.968801 1.04632

```

. Chi-squared test for master\_off\_line

```

chi2( 9) = 6.32
Prob > chi2 = 0.7071

```

. Chi-squared test for master\_off\_line\*new\_religion\_breakdown

```

chi2( 51) = 62.08
Prob > chi2 = 0.1375

```

#### INTERACTION WITH EMPLOYMENT

```

-----
|               Robust
divorced_separated | Coef. Std. Err.  z  P>|z|  [95% Conf. Interval]
-----+-----
master_off_line |
13 | .5779858 .4051522  1.43 0.154  -2.160979  1.372069
14 | .053926 .5776278  0.09 0.926  -1.078204  1.186056
15 | -.8679476 .6071881 -1.43 0.153  -2.058014
.3221192
16 | .6941349 .4855852  1.43 0.153  -2.2575945  1.645864
17 | -1.104998 .9339438 -1.18 0.237  -2.935494
.7254984
18 | 1.096929 .4699072  2.33 0.020  .1759275  2.01793
19 | -.0432348 .4952991 -0.09 0.930  -1.014003
.9275336
20 | 1.449906 .8986011  1.61 0.107  -.3113192  3.211132
21 | -.2446522 .5032094 -0.49 0.627  -1.230924
.7416201
|
|
master_off_line*new_employment_breakdown |

```

|          |      |           |          |       |       |           |           |
|----------|------|-----------|----------|-------|-------|-----------|-----------|
| .4377956 | 13 1 | -.4502589 | .4530973 | -0.99 | 0.320 | -1.338313 |           |
| 1.096533 | 13 2 | -.5488094 | .8394758 | -0.65 | 0.513 | -2.194152 |           |
| .845016  | 13 3 | -.2170475 | .5418791 | -0.40 | 0.689 | -1.279111 |           |
| .8189666 | 13 4 | -.2386698 | .5396203 | -0.44 | 0.658 | -1.296306 |           |
| .6750976 | 14 1 | -.35183   | .6156261 | -0.57 | 0.568 | -1.558435 | .854775   |
| 1.315502 | 14 2 | -1.93258  | 1.330472 | -1.45 | 0.146 | -4.540257 |           |
| 1.520526 | 14 3 | -.0711411 | .7074839 | -0.10 | 0.920 | -1.457784 |           |
| 2.051957 | 14 4 | .1129291  | .7181746 | 0.16  | 0.875 | -1.294667 |           |
| 2.544079 | 15 1 | .7479449  | .6653244 | 1.12  | 0.261 | -.5560668 |           |
| 2.462082 | 15 2 | .3850924  | 1.101544 | 0.35  | 0.727 | -1.773895 |           |
| 2.980729 | 15 3 | .9559682  | .7684396 | 1.24  | 0.213 | -.5501458 |           |
| .2075578 | 15 4 | 1.559684  | .7250366 | 2.15  | 0.031 | .1386379  |           |
| .4388403 | 16 1 | -.8467454 | .5379197 | -1.57 | 0.115 | -1.901049 |           |
| 1.080559 | 16 2 | -1.482853 | .9804738 | -1.51 | 0.130 | -3.404546 |           |
| 3.037223 | 16 3 | -1.45229  | .6696735 | -2.17 | 0.030 | -2.764826 | -.139754  |
| 1.741896 | 16 4 | -.155652  | .6307316 | -0.25 | 0.805 | -1.391863 |           |
| 3.963695 | 17 1 | 1.027842  | 1.025213 | 1.00  | 0.316 | -.9815383 |           |
| .211838  | 17 2 | -1.169891 | 1.485633 | -0.79 | 0.431 | -4.081679 |           |
| .5279536 | 17 3 | 1.808489  | 1.099615 | 1.64  | 0.100 | -.3467175 |           |
| 1.056453 | 17 4 | 1.846239  | 1.074391 | 1.72  | 0.086 | -.259529  | 3.952006  |
| .7470912 | 18 1 | -1.264141 | .5368991 | -2.35 | 0.019 | -2.316444 | -         |
|          | 18 2 | -1.517978 | 1.043862 | -1.45 | 0.146 | -3.563911 |           |
|          | 18 3 | -1.487865 | .68378   | -2.18 | 0.030 | -2.828049 | -.1476806 |
|          | 18 4 | -.1576209 | .6194368 | -0.25 | 0.799 | -1.371695 |           |
|          | 19 1 | -.4144859 | .5926523 | -0.70 | 0.484 | -1.576063 |           |

|          |      |           |          |       |       |           |         |
|----------|------|-----------|----------|-------|-------|-----------|---------|
| .3548613 | 19 2 | -1.754552 | 1.076251 | -1.63 | 0.103 | -3.863965 |         |
| .819496  | 19 3 | -.5524994 | .7000105 | -0.79 | 0.430 | -1.924495 |         |
| 2.208609 | 19 4 | .6752184  | .7823565 | 0.86  | 0.388 | -8581722  |         |
| .6435209 | 20 1 | -1.342564 | 1.013327 | -1.32 | 0.185 | -3.32865  |         |
|          | 20 2 | 0 (empty) |          |       |       |           |         |
| .0266887 | 20 3 | -2.251617 | 1.135188 | -1.98 | 0.047 | -4.476545 | -       |
| 1.231054 | 20 4 | -.8345803 | 1.053914 | -0.79 | 0.428 | -2.900214 |         |
| 1.756826 | 21 1 | .6643945  | .5573733 | 1.19  | 0.233 | -4280371  |         |
| .6851355 | 21 2 | -1.250813 | .987747  | -1.27 | 0.205 | -3.186761 |         |
| 1.518748 | 21 3 | -.0740733 | .812679  | -0.09 | 0.927 | -1.666895 |         |
|          | 21 4 | .6879115  | .6465416 | 1.06  | 0.287 | -5792867  | 1.95511 |
|          |      |           |          |       |       |           |         |

. Chi-squared test for master\_off\_line

chi2( 9) = 19.01  
 Prob > chi2 = 0.0251

. Chi-squared test for master\_off\_line\*new\_employment\_breakdown

chi2( 35) = 48.11  
 Prob > chi2 = 0.0690

**Does meeting in different ONLINE VENUES (variable name "master\_on\_line") predict marital satisfaction?**

WITHOUT INTERACTIONS

Tests of Model Effects

| Effect         | Num DF | F Value | Pr > F |
|----------------|--------|---------|--------|
| Model          | 35     | 3.20    | <.0001 |
| Master_On_Line | 10     | 3.51    | 0.0001 |

Estimated Regression Coefficients

| Parameter         | Estimate   | Standard Error | t Value | Pr >  t |
|-------------------|------------|----------------|---------|---------|
| Master_On_Line 1  | -0.0389264 | 0.08014652     | -0.49   | 0.6272  |
| Master_On_Line 2  | -0.0212990 | 0.12046214     | -0.18   | 0.8597  |
| Master_On_Line 3  | -0.2470606 | 0.08199445     | -3.01   | 0.0026  |
| Master_On_Line 4  | -0.1161899 | 0.13334332     | -0.87   | 0.3836  |
| Master_On_Line 6  | 0.0154543  | 0.04895120     | 0.32    | 0.7522  |
| Master_On_Line 7  | -0.0318193 | 0.10895709     | -0.29   | 0.7703  |
| Master_On_Line 8  | 0.0465023  | 0.08913177     | 0.52    | 0.6019  |
| Master_On_Line 9  | -0.3749472 | 0.07715777     | -4.86   | <.0001  |
| Master_On_Line 10 | -0.0726560 | 0.12683772     | -0.57   | 0.5668  |
| Master_On_Line 11 | -0.1174125 | 0.12156582     | -0.97   | 0.3342  |
| Master_On_Line 12 | 0.0000000  | 0.00000000     | .       | .       |

INTERACTION WITH YEAR OF MARRIAGE

Tests of Model Effects

| Effect              | Num DF | F Value | Pr > F |
|---------------------|--------|---------|--------|
| Model               | 45     | 2.98    | <.0001 |
| Master_On_Line      | 10     | 2.77    | 0.0020 |
| year*Master_On_Line | 11     | 1.98    | 0.0266 |

Estimated Regression Coefficients

| Parameter        | Estimate   | Standard Error | t Value | Pr >  t |
|------------------|------------|----------------|---------|---------|
| Master_On_Line 1 | -0.0629048 | 0.19322503     | -0.33   | 0.7448  |
| Master_On_Line 2 | -0.5956102 | 0.29715796     | -2.00   | 0.0451  |
| Master_On_Line 3 | -0.6203883 | 0.24896886     | -2.49   | 0.0127  |

|                   |            |                                   |       |        |
|-------------------|------------|-----------------------------------|-------|--------|
| Master_On_Line 4  | -0.0656631 | 0.41160106                        | -0.16 | 0.8733 |
| Master_On_Line 6  | -0.0667512 | 0.10381463                        | -0.64 | 0.5203 |
| Master_On_Line 7  | -0.1332290 | 0.25057604                        | -0.53 | 0.5950 |
| Master_On_Line 8  | -0.4423908 | 0.22845981                        | -1.94 | 0.0529 |
| Master_On_Line 9  | -0.8547747 | 0.23047567                        | -3.71 | 0.0002 |
| Master_On_Line 10 | -0.2195848 | 0.35815080                        | -0.61 | 0.5398 |
| Master_On_Line 11 | -0.6502832 | 0.32103986                        | -2.03 | 0.0429 |
| The SAS System    |            | 13:42 Thursday, April 11, 2013 23 |       |        |

### The SURVEYREG Procedure

#### Regression Analysis for Dependent Variable total\_sat

#### Estimated Regression Coefficients

| Parameter              | Estimate   | Standard Error | t Value | Pr >  t |
|------------------------|------------|----------------|---------|---------|
| Master_On_Line 12      | 0.0000000  | 0.00000000     | .       | .       |
| Year*Master_On_Line 1  | -0.0341408 | 0.03189094     | -1.07   | 0.2844  |
| Year*Master_On_Line 2  | 0.0621766  | 0.04839987     | 1.28    | 0.1990  |
| Year*Master_On_Line 3  | 0.0248566  | 0.03693777     | 0.67    | 0.5010  |
| Year*Master_On_Line 4  | -0.0484574 | 0.06496465     | -0.75   | 0.4558  |
| Year*Master_On_Line 6  | -0.0252330 | 0.01624537     | -1.55   | 0.1204  |
| Year*Master_On_Line 7  | -0.0221916 | 0.04724956     | -0.47   | 0.6386  |
| Year*Master_On_Line 8  | 0.0542058  | 0.03684706     | 1.47    | 0.1413  |
| Year*Master_On_Line 9  | 0.0449131  | 0.03796283     | 1.18    | 0.2368  |
| Year*Master_On_Line 10 | -0.0124323 | 0.06729732     | -0.18   | 0.8534  |
| Year*Master_On_Line 11 | 0.0592450  | 0.04865256     | 1.22    | 0.2234  |
| Year*Master_On_Line 12 | -0.0402634 | 0.01263008     | -3.19   | 0.0014  |

#### INTERACTION WITH GENDER

#### Tests of Model Effects

| Effect                | Num DF | F Value | Pr > F |
|-----------------------|--------|---------|--------|
| Model                 | 45     | 2.67    | <.0001 |
| Master_On_Line        | 10     | 2.08    | 0.0226 |
| Gender*Master_On_Line | 11     | 1.05    | 0.3960 |

#### Estimated Regression Coefficients

| Parameter | Estimate | Standard Error | t Value | Pr >  t |
|-----------|----------|----------------|---------|---------|
|-----------|----------|----------------|---------|---------|

|        |                          |            |            |       |        |
|--------|--------------------------|------------|------------|-------|--------|
|        | Intercept                | 5.8656115  | 0.21904000 | 26.78 | <.0001 |
|        | Master_On_Line 1         | -0.1348732 | 0.26947724 | -0.50 | 0.6167 |
|        | Master_On_Line 2         | -0.3001799 | 0.36795657 | -0.82 | 0.4147 |
|        | Master_On_Line 3         | -0.5187425 | 0.26114783 | -1.99 | 0.0470 |
|        | Master_On_Line 4         | -0.3109728 | 0.42168016 | -0.74 | 0.4609 |
|        | Master_On_Line 6         | 0.1588196  | 0.14479043 | 1.10  | 0.2727 |
|        | Master_On_Line 7         | -0.2092468 | 0.32720104 | -0.64 | 0.5225 |
|        | Master_On_Line 8         | 0.0970692  | 0.28376965 | 0.34  | 0.7323 |
|        | Master_On_Line 9         | -0.7675036 | 0.22494822 | -3.41 | 0.0007 |
|        | Master_On_Line 10        | -0.1870051 | 0.38413030 | -0.49 | 0.6264 |
|        | Master_On_Line 11        | -0.2472797 | 0.42728008 | -0.58 | 0.5628 |
|        | Master_On_Line 12        | 0.0000000  | 0.00000000 | .     | .      |
| 0.5230 | Gender*Master_On_Line 1  | 0.0941045  | 0.14733783 | 0.64  |        |
| 0.3203 | Gender*Master_On_Line 2  | 0.2234650  | 0.22481288 | 0.99  |        |
| 0.1227 | Gender*Master_On_Line 3  | 0.2184258  | 0.14149088 | 1.54  |        |
| 0.5295 | Gender*Master_On_Line 4  | 0.1588980  | 0.25271361 | 0.63  |        |
| 0.3361 | Gender*Master_On_Line 6  | -0.0738004 | 0.07671794 | -0.96 |        |
| 0.4970 | Gender*Master_On_Line 7  | 0.1430822  | 0.21063298 | 0.68  |        |
| 0.9574 | Gender*Master_On_Line 8  | -0.0087346 | 0.16362360 | -0.05 |        |
| 0.0183 | Gender*Master_On_Line 9  | 0.3283578  | 0.13914247 | 2.36  |        |
| 0.6803 | Gender*Master_On_Line 10 | 0.1102127  | 0.26745816 | 0.41  |        |
| 0.6216 | Gender*Master_On_Line 11 | 0.1168746  | 0.23680037 | 0.49  |        |
| 0.6542 | Gender*Master_On_Line 12 | 0.0260966  | 0.05825954 | 0.45  |        |

## INTERACTION WITH AGE

## Tests of Model Effects

| Effect             | Num DF | F Value | Pr > F |
|--------------------|--------|---------|--------|
| Model              | 45     | 3.17    | <.0001 |
| Master_On_Line     | 10     | 2.38    | 0.0082 |
| Age*Master_On_Line | 10     | 1.46    | 0.1482 |

## Estimated Regression Coefficients

| Parameter             | Standard   |            |         |         |
|-----------------------|------------|------------|---------|---------|
|                       | Estimate   | Error      | t Value | Pr >  t |
| Master_On_Line 1      | -0.4667109 | 0.25172410 | -1.85   | 0.0638  |
| Master_On_Line 2      | 0.2454931  | 0.36744786 | 0.67    | 0.5041  |
| Master_On_Line 3      | -1.0530576 | 0.27409887 | -3.84   | 0.0001  |
| Master_On_Line 4      | -0.2111214 | 0.65355533 | -0.32   | 0.7467  |
| Master_On_Line 6      | 0.0350379  | 0.20111962 | 0.17    | 0.8617  |
| Master_On_Line 7      | 0.0249773  | 0.29230009 | 0.09    | 0.9319  |
| Master_On_Line 8      | -0.3295007 | 0.29449884 | -1.12   | 0.2633  |
| Master_On_Line 9      | -0.6551488 | 0.27458081 | -2.39   | 0.0171  |
| Master_On_Line 10     | -0.2771051 | 0.49269605 | -0.56   | 0.5739  |
| Master_On_Line 11     | 0.0148506  | 0.42766991 | 0.03    | 0.9723  |
| Master_On_Line 12     | 0.0000000  | 0.00000000 | .       | .       |
| Age*Master_On_Line 1  | 0.0071743  | 0.00621618 | 1.15    | 0.2485  |
| Age*Master_On_Line 2  | -0.0104440 | 0.00906094 | -1.15   | 0.2491  |
| Age*Master_On_Line 3  | 0.0162997  | 0.00669819 | 2.43    | 0.0150  |
| Age*Master_On_Line 4  | -0.0022249 | 0.01769259 | -0.13   | 0.8999  |
| Age*Master_On_Line 6  | -0.0055653 | 0.00569626 | -0.98   | 0.3286  |
| Age*Master_On_Line 7  | -0.0066326 | 0.00785063 | -0.84   | 0.3982  |
| Age*Master_On_Line 8  | 0.0056483  | 0.00689597 | 0.82    | 0.4128  |
| Age*Master_On_Line 9  | 0.0029609  | 0.00703366 | 0.42    | 0.6738  |
| Age*Master_On_Line 10 | 0.0007968  | 0.01335342 | 0.06    | 0.9524  |
| Age*Master_On_Line 11 | -0.0074054 | 0.01114256 | -0.66   | 0.5063  |
| Age*Master_On_Line 12 | -0.0045561 | 0.00259259 | -1.76   | 0.0789  |

## INTERACTION WITH ETHNICITY

### Tests of Model Effects

| Effect                                 | Num DF | F Value | Pr > F |
|----------------------------------------|--------|---------|--------|
| Model                                  | 72     | 28.02   | <.0001 |
| Master_On_Line                         | 10     | 4.00    | <.0001 |
| Master_On_Line*New_Ethnicity_Breakdown | 40     | 3.13    | <.0001 |

### Estimated Regression Coefficients

| Parameter        | Standard   |            |         |         |
|------------------|------------|------------|---------|---------|
|                  | Estimate   | Error      | t Value | Pr >  t |
| Master_On_Line 1 | -0.0324053 | 0.38777092 | -0.08   | 0.9334  |
| Master_On_Line 2 | 0.6871599  | 0.13790231 | 4.98    | <.0001  |
| Master_On_Line 3 | -0.4544162 | 0.59807449 | -0.76   | 0.4474  |
| Master_On_Line 4 | 0.2525355  | 0.19343700 | 1.31    | 0.1918  |
| Master_On_Line 6 | -0.3070717 | 0.23887621 | -1.29   | 0.1987  |

|                                            |            |            |       |        |
|--------------------------------------------|------------|------------|-------|--------|
| Master_On_Line 7                           | -0.5968161 | 0.68701143 | -0.87 | 0.3850 |
| Master_On_Line 8                           | 0.2469767  | 0.23671712 | 1.04  | 0.2968 |
| Master_On_Line 9                           | -0.4910335 | 0.50145639 | -0.98 | 0.3275 |
| Master_On_Line 10                          | 0.3626276  | 0.16227860 | 2.23  | 0.0255 |
| Master_On_Line 11                          | -0.9436205 | 0.93513129 | -1.01 | 0.3130 |
| Master_On_Line 12                          | 0.0000000  | 0.00000000 | .     | .      |
| Master_On_Line*New_Ethnicity_Breakdown 1 1 | -0.0855620 | 0.37626864 |       |        |
| -0.23 0.8201                               |            |            |       |        |
| Master_On_Line*New_Ethnicity_Breakdown 1 2 | 0.7880007  | 0.37820417 |       |        |
| 2.08 0.0373                                |            |            |       |        |
| Master_On_Line*New_Ethnicity_Breakdown 1 3 | -0.1403883 | 0.41266283 |       |        |
| -0.34 0.7337                               |            |            |       |        |
| Master_On_Line*New_Ethnicity_Breakdown 1 4 | -0.0710195 | 0.42948158 |       |        |
| -0.17 0.8687                               |            |            |       |        |
| Master_On_Line*New_Ethnicity_Breakdown 1 5 | 0.0000000  | 0.00000000 |       |        |
| .                                          | .          |            |       |        |
| Master_On_Line*New_Ethnicity_Breakdown 2 1 | -0.6977986 | 0.16088501 |       |        |
| -4.34 <.0001                               |            |            |       |        |
| Master_On_Line*New_Ethnicity_Breakdown 2 2 | -0.0623044 | 0.06497950 |       |        |
| -0.96 0.3377                               |            |            |       |        |
| Master_On_Line*New_Ethnicity_Breakdown 2 3 | -0.9195524 | 0.20479015 |       |        |
| -4.49 <.0001                               |            |            |       |        |
| Master_On_Line*New_Ethnicity_Breakdown 2 4 | -1.4355469 | 0.31846918 |       |        |
| -4.51 <.0001                               |            |            |       |        |
| Master_On_Line*New_Ethnicity_Breakdown 2 5 | 0.0000000  | 0.00000000 |       |        |
| .                                          | .          |            |       |        |
| Master_On_Line*New_Ethnicity_Breakdown 3 1 | 0.2839779  | 0.59408843 |       |        |
| 0.48 0.6327                                |            |            |       |        |
| Master_On_Line*New_Ethnicity_Breakdown 3 2 | 0.6278503  | 0.60530023 |       |        |
| 1.04 0.2997                                |            |            |       |        |
| Master_On_Line*New_Ethnicity_Breakdown 3 3 | -0.1645470 | 0.59991889 |       |        |
| -0.27 0.7839                               |            |            |       |        |
| Master_On_Line*New_Ethnicity_Breakdown 3 4 | 0.3127457  | 0.62797378 |       |        |
| 0.50 0.6185                                |            |            |       |        |
| Master_On_Line*New_Ethnicity_Breakdown 3 5 | 0.0000000  | 0.00000000 |       |        |
| .                                          | .          |            |       |        |
| Master_On_Line*New_Ethnicity_Breakdown 4 1 | -0.4918756 | 0.21763261 |       |        |
| -2.26 0.0239                               |            |            |       |        |
| Master_On_Line*New_Ethnicity_Breakdown 4 2 | -0.1339159 | 0.18993643 |       |        |
| -0.71 0.4808                               |            |            |       |        |
| Master_On_Line*New_Ethnicity_Breakdown 4 3 | -0.4532102 | 0.27310947 |       |        |
| -1.66 0.0971                               |            |            |       |        |
| Master_On_Line*New_Ethnicity_Breakdown 4 4 | -0.0047443 | 0.16511966 |       |        |
| -0.03 0.9771                               |            |            |       |        |
| Master_On_Line*New_Ethnicity_Breakdown 4 5 | 0.0000000  | 0.00000000 |       |        |
| .                                          | .          |            |       |        |



|                                             |            |            |
|---------------------------------------------|------------|------------|
| Master_On_Line*New_Ethnicity_Breakdown 6 1  | 0.2227410  | 0.21070379 |
| 1.06 0.2905                                 |            |            |
| Master_On_Line*New_Ethnicity_Breakdown 6 2  | 0.4746997  | 0.22697749 |
| 2.09 0.0365                                 |            |            |
| Master_On_Line*New_Ethnicity_Breakdown 6 3  | 0.2428660  | 0.21947594 |
| 1.11 0.2685                                 |            |            |
| Master_On_Line*New_Ethnicity_Breakdown 6 4  | 0.2785172  | 0.25142424 |
| 1.11 0.2680                                 |            |            |
| Master_On_Line*New_Ethnicity_Breakdown 6 5  | 0.0000000  | 0.00000000 |
| .                                           | .          | .          |
| Master_On_Line*New_Ethnicity_Breakdown 7 1  | 0.5340236  | 0.68355463 |
| 0.78 0.4347                                 |            |            |
| Master_On_Line*New_Ethnicity_Breakdown 7 2  | 0.9645017  | 0.70793330 |
| 1.36 0.1731                                 |            |            |
| Master_On_Line*New_Ethnicity_Breakdown 7 3  | 0.2517776  | 0.73180349 |
| 0.34 0.7308                                 |            |            |
| Master_On_Line*New_Ethnicity_Breakdown 7 4  | 0.5861781  | 0.68874775 |
| 0.85 0.3948                                 |            |            |
| Master_On_Line*New_Ethnicity_Breakdown 7 5  | 0.0000000  | 0.00000000 |
| .                                           | .          | .          |
| Master_On_Line*New_Ethnicity_Breakdown 8 1  | -0.3559455 | 0.22693663 |
| -1.57 0.1168                                |            |            |
| Master_On_Line*New_Ethnicity_Breakdown 8 2  | 0.3269414  | 0.22572469 |
| 1.45 0.1476                                 |            |            |
| Master_On_Line*New_Ethnicity_Breakdown 8 3  | -0.2205690 | 0.25603180 |
| -0.86 0.3890                                |            |            |
| Master_On_Line*New_Ethnicity_Breakdown 8 4  | 0.0145295  | 0.22485135 |
| 0.06 0.9485                                 |            |            |
| Master_On_Line*New_Ethnicity_Breakdown 8 5  | 0.0000000  | 0.00000000 |
| .                                           | .          | .          |
| Master_On_Line*New_Ethnicity_Breakdown 9 1  | 0.1184830  | 0.49280841 |
| 0.24 0.8100                                 |            |            |
| Master_On_Line*New_Ethnicity_Breakdown 9 2  | -0.2232410 | 0.59457044 |
| -0.38 0.7073                                |            |            |
| Master_On_Line*New_Ethnicity_Breakdown 9 3  | -0.0184668 | 0.50417759 |
| -0.04 0.9708                                |            |            |
| Master_On_Line*New_Ethnicity_Breakdown 9 4  | -0.1907145 | 0.57605291 |
| -0.33 0.7406                                |            |            |
| Master_On_Line*New_Ethnicity_Breakdown 9 5  | 0.0000000  | 0.00000000 |
| .                                           | .          | .          |
| Master_On_Line*New_Ethnicity_Breakdown 10 1 | -0.5516219 | 0.17857553 |
| -3.09 0.0020                                |            |            |
| Master_On_Line*New_Ethnicity_Breakdown 10 2 | 0.1323960  | 0.38152399 |
| 0.35 0.7286                                 |            |            |
| Master_On_Line*New_Ethnicity_Breakdown 10 3 | -0.4387918 | 0.27490251 |
| -1.60 0.1105                                |            |            |

|                                        |        |            |            |
|----------------------------------------|--------|------------|------------|
| Master_On_Line*New_Ethnicity_Breakdown | 10 4   | -1.8773553 | 0.79351090 |
| -2.37                                  | 0.0180 |            |            |
| Master_On_Line*New_Ethnicity_Breakdown | 10 5   | 0.0000000  | 0.00000000 |
| .                                      | .      |            |            |
| Master_On_Line*New_Ethnicity_Breakdown | 11 1   | 0.8821025  | 0.93598379 |
| 0.94                                   | 0.3460 |            |            |
| Master_On_Line*New_Ethnicity_Breakdown | 11 2   | -0.0577895 | 1.00415993 |
| -0.06                                  | 0.9541 |            |            |
| Master_On_Line*New_Ethnicity_Breakdown | 11 3   | 0.6942652  | 0.98489471 |
| 0.70                                   | 0.4809 |            |            |
| Master_On_Line*New_Ethnicity_Breakdown | 11 4   | 1.1388774  | 0.95029235 |
| 1.20                                   | 0.2308 |            |            |
| Master_On_Line*New_Ethnicity_Breakdown | 11 5   | 0.0000000  | 0.00000000 |
| .                                      | .      |            |            |
| Master_On_Line*New_Ethnicity_Breakdown | 12 1   | -0.0910883 | 0.12645183 |
| -0.72                                  | 0.4713 |            |            |
| Master_On_Line*New_Ethnicity_Breakdown | 12 2   | -0.0062991 | 0.19424702 |
| -0.03                                  | 0.9741 |            |            |
| Master_On_Line*New_Ethnicity_Breakdown | 12 3   | -0.0456833 | 0.13823112 |
| -0.33                                  | 0.7410 |            |            |
| Master_On_Line*New_Ethnicity_Breakdown | 12 4   | 0.0052071  | 0.15157061 |
| 0.03                                   | 0.9726 |            |            |
| Master_On_Line*New_Ethnicity_Breakdown | 12 5   | 0.0000000  | 0.00000000 |
| .                                      | .      |            |            |

## INTERACTION WITH INCOME

### Tests of Model Effects

| Effect                              | Num DF | F Value | Pr > F |
|-------------------------------------|--------|---------|--------|
| Model                               | 95     | 35.46   | <.0001 |
| Master_On_Line                      | 10     | 4.50    | <.0001 |
| Master_On_Line*New_Income_Breakdown | 60     | 3.40    | <.0001 |

### Estimated Regression Coefficients

| Parameter        | Standard   |            | t Value | Pr >  t |
|------------------|------------|------------|---------|---------|
|                  | Estimate   | Error      |         |         |
| Master_On_Line 1 | 0.0253217  | 0.16135150 | 0.16    | 0.8753  |
| Master_On_Line 2 | 0.1905629  | 0.15137729 | 1.26    | 0.2081  |
| Master_On_Line 3 | -0.3189749 | 0.12645456 | -2.52   | 0.0117  |
| Master_On_Line 4 | 0.1505170  | 0.13262771 | 1.13    | 0.2565  |
| Master_On_Line 6 | 0.1058756  | 0.08188688 | 1.29    | 0.1961  |
| Master_On_Line 7 | 0.0514353  | 0.15837284 | 0.32    | 0.7454  |

|      |                                         |            |            |       |        |  |
|------|-----------------------------------------|------------|------------|-------|--------|--|
|      | Master_On_Line 8                        | 0.0387232  | 0.12945730 | 0.30  | 0.7649 |  |
|      | Master_On_Line 9                        | -0.3719881 | 0.12329589 | -3.02 | 0.0026 |  |
|      | Master_On_Line 10                       | -0.0417886 | 0.16657935 | -0.25 | 0.8019 |  |
|      | Master_On_Line 11                       | 0.0506895  | 0.19437900 | 0.26  | 0.7943 |  |
|      | Master_On_Line 12                       | 0.0000000  | 0.00000000 | .     | .      |  |
| 2.52 | Master_On_Line*New_Income_Breakdown 1 1 | -1.4417263 | 0.57221594 | -     |        |  |
| 0.40 | 0.0118                                  |            |            |       |        |  |
| 0.40 | Master_On_Line*New_Income_Breakdown 1 2 | -0.1727026 | 0.42657695 | -     |        |  |
| 0.15 | 0.6856                                  |            |            |       |        |  |
| 0.15 | Master_On_Line*New_Income_Breakdown 1 3 | -0.0385597 | 0.25012258 | -     |        |  |
| 0.41 | 0.8775                                  |            |            |       |        |  |
| 0.41 | Master_On_Line*New_Income_Breakdown 1 4 | 0.0986102  | 0.23780670 |       |        |  |
| 0.38 | 0.6784                                  |            |            |       |        |  |
| 0.38 | Master_On_Line*New_Income_Breakdown 1 5 | 0.0685256  | 0.18117195 |       |        |  |
| 0.87 | 0.7053                                  |            |            |       |        |  |
| 0.87 | Master_On_Line*New_Income_Breakdown 1 6 | -0.2041303 | 0.23390694 | -     |        |  |
| .    | 0.3829                                  |            |            |       |        |  |
| .    | Master_On_Line*New_Income_Breakdown 1 7 | 0.0000000  | 0.00000000 | .     |        |  |
| 0.73 | 0.4629                                  |            |            |       |        |  |
| 0.22 | Master_On_Line*New_Income_Breakdown 2 1 | -0.2971286 | 0.40471152 | -     |        |  |
| 0.22 | 0.8221                                  |            |            |       |        |  |
| 2.65 | Master_On_Line*New_Income_Breakdown 2 2 | -0.1043776 | 0.46421565 | -     |        |  |
| 0.54 | 0.0081                                  |            |            |       |        |  |
| 0.54 | Master_On_Line*New_Income_Breakdown 2 3 | -0.8901388 | 0.33601916 | -     |        |  |
| 0.84 | 0.5914                                  |            |            |       |        |  |
| 0.84 | Master_On_Line*New_Income_Breakdown 2 4 | 0.1605370  | 0.29907542 |       |        |  |
| 0.84 | 0.4010                                  |            |            |       |        |  |
| 0.85 | Master_On_Line*New_Income_Breakdown 2 5 | -0.2504771 | 0.29822511 | -     |        |  |
| 0.85 | 0.4010                                  |            |            |       |        |  |
| 0.85 | Master_On_Line*New_Income_Breakdown 2 6 | -0.2913068 | 0.34189700 | -     |        |  |
| 0.85 | 0.3942                                  |            |            |       |        |  |
| .    | Master_On_Line*New_Income_Breakdown 2 7 | 0.0000000  | 0.00000000 | .     |        |  |
| 0.15 | 0.8813                                  |            |            |       |        |  |
| 0.15 | Master_On_Line*New_Income_Breakdown 3 1 | -0.0766730 | 0.51324637 | -     |        |  |
| 0.56 | 0.5758                                  |            |            |       |        |  |
| 0.56 | Master_On_Line*New_Income_Breakdown 3 2 | 0.1546669  | 0.27638892 |       |        |  |
| 2.75 | 0.0059                                  |            |            |       |        |  |
| 2.75 | Master_On_Line*New_Income_Breakdown 3 3 | 0.5367195  | 0.19487987 |       |        |  |
| 1.73 | 0.0844                                  |            |            |       |        |  |
| 1.73 | Master_On_Line*New_Income_Breakdown 3 4 | 0.3022506  | 0.17511682 |       |        |  |
| 0.30 | 0.7634                                  |            |            |       |        |  |
| 0.30 | Master_On_Line*New_Income_Breakdown 3 5 | 0.0605109  | 0.20103977 |       |        |  |
| 0.05 | 0.9579                                  |            |            |       |        |  |
| 0.05 | Master_On_Line*New_Income_Breakdown 3 6 | -0.0158710 | 0.30070588 | -     |        |  |

|      |                                         |            |            |   |
|------|-----------------------------------------|------------|------------|---|
|      | Master_On_Line*New_Income_Breakdown 3 7 | 0.0000000  | 0.00000000 | . |
| 1.70 | 0.0883                                  |            |            |   |
|      | Master_On_Line*New_Income_Breakdown 4 1 | -0.8481275 | 0.49745327 | - |
| 4.48 | <.0001                                  |            |            |   |
|      | Master_On_Line*New_Income_Breakdown 4 2 | 0.6529652  | 0.14560744 |   |
| 0.97 | 0.3297                                  |            |            |   |
|      | Master_On_Line*New_Income_Breakdown 4 3 | -0.6390340 | 0.65559838 | - |
| 1.10 | 0.2707                                  |            |            |   |
|      | Master_On_Line*New_Income_Breakdown 4 4 | -0.4147882 | 0.37651635 | - |
| 0.71 | 0.4782                                  |            |            |   |
|      | Master_On_Line*New_Income_Breakdown 4 5 | -0.1722030 | 0.24279286 | - |
| 2.05 | 0.0407                                  |            |            |   |
|      | Master_On_Line*New_Income_Breakdown 4 6 | -0.9253098 | 0.45190235 | - |
|      | Master_On_Line*New_Income_Breakdown 4 7 | 0.0000000  | 0.00000000 | . |
|      |                                         |            |            |   |
| 2.00 | 0.0452                                  |            |            |   |
|      | Master_On_Line*New_Income_Breakdown 6 1 | -0.5574637 | 0.27830862 | - |
| 0.17 | 0.8668                                  |            |            |   |
|      | Master_On_Line*New_Income_Breakdown 6 2 | -0.0218421 | 0.13022659 | - |
| 0.80 | 0.4255                                  |            |            |   |
|      | Master_On_Line*New_Income_Breakdown 6 3 | -0.0941066 | 0.11807848 | - |
| 1.13 | 0.2583                                  |            |            |   |
|      | Master_On_Line*New_Income_Breakdown 6 4 | -0.1236253 | 0.10935453 | - |
| 1.74 | 0.0818                                  |            |            |   |
|      | Master_On_Line*New_Income_Breakdown 6 5 | -0.2072533 | 0.11904977 | - |
| 0.26 | 0.7965                                  |            |            |   |
|      | Master_On_Line*New_Income_Breakdown 6 6 | 0.0244419  | 0.09475858 |   |
|      | Master_On_Line*New_Income_Breakdown 6 7 | 0.0000000  | 0.00000000 | . |
|      |                                         |            |            |   |
| 0.57 | 0.5716                                  |            |            |   |
|      | Master_On_Line*New_Income_Breakdown 7 1 | -0.2167901 | 0.38316649 | - |
| 1.13 | 0.2606                                  |            |            |   |
|      | Master_On_Line*New_Income_Breakdown 7 2 | -0.7702617 | 0.68454914 | - |
| 0.41 | 0.6831                                  |            |            |   |
|      | Master_On_Line*New_Income_Breakdown 7 3 | -0.1344898 | 0.32939744 | - |
| 1.99 | 0.0464                                  |            |            |   |
|      | Master_On_Line*New_Income_Breakdown 7 4 | -1.1216161 | 0.56289097 | - |
| 1.06 | 0.2909                                  |            |            |   |
|      | Master_On_Line*New_Income_Breakdown 7 5 | 0.2152165  | 0.20377143 |   |
| 0.36 | 0.7204                                  |            |            |   |
|      | Master_On_Line*New_Income_Breakdown 7 6 | 0.0795128  | 0.22216929 |   |
|      | Master_On_Line*New_Income_Breakdown 7 7 | 0.0000000  | 0.00000000 | . |
|      |                                         |            |            |   |
| 2.02 | 0.0433                                  |            |            |   |
|      | Master_On_Line*New_Income_Breakdown 8 1 | 0.3528145  | 0.17458910 |   |

|       |                                          |            |            |   |
|-------|------------------------------------------|------------|------------|---|
| 0.62  | Master_On_Line*New_Income_Breakdown 8 2  | 0.1366616  | 0.21977582 |   |
| 1.46  | Master_On_Line*New_Income_Breakdown 8 3  | -0.6830127 | 0.46684619 | - |
| 1.44  | Master_On_Line*New_Income_Breakdown 8 4  | -0.4279640 | 0.29644754 | - |
| 2.55  | Master_On_Line*New_Income_Breakdown 8 5  | 0.4218215  | 0.16525058 |   |
| 1.21  | Master_On_Line*New_Income_Breakdown 8 6  | 0.2558727  | 0.21133485 |   |
| .     | Master_On_Line*New_Income_Breakdown 8 7  | 0.0000000  | 0.00000000 | . |
| 5.19  | Master_On_Line*New_Income_Breakdown 9 1  | -1.6126010 | 0.31072287 | - |
| 2.42  | Master_On_Line*New_Income_Breakdown 9 2  | 0.5080071  | 0.20956696 |   |
| 0.84  | Master_On_Line*New_Income_Breakdown 9 3  | -0.2939243 | 0.34959649 | - |
| 1.23  | Master_On_Line*New_Income_Breakdown 9 4  | 0.2464302  | 0.20043154 |   |
| 0.22  | Master_On_Line*New_Income_Breakdown 9 5  | 0.0409116  | 0.18880553 |   |
| 0.51  | Master_On_Line*New_Income_Breakdown 9 6  | 0.0909826  | 0.17697107 |   |
| .     | Master_On_Line*New_Income_Breakdown 9 7  | 0.0000000  | 0.00000000 | . |
| 4.50  | Master_On_Line*New_Income_Breakdown 10 1 | 0.8028754  | 0.17840796 |   |
| -0.52 | Master_On_Line*New_Income_Breakdown 10 2 | -0.3910429 | 0.74931649 |   |
| -0.24 | Master_On_Line*New_Income_Breakdown 10 3 | -0.0966397 | 0.40272026 |   |
| 1.68  | Master_On_Line*New_Income_Breakdown 10 4 | 0.4581541  | 0.27281396 |   |
| 0.22  | Master_On_Line*New_Income_Breakdown 10 5 | 0.0766234  | 0.34918483 |   |
| -2.30 | Master_On_Line*New_Income_Breakdown 10 6 | -0.7907216 | 0.34372350 |   |
| .     | Master_On_Line*New_Income_Breakdown 10 7 | 0.0000000  | 0.00000000 | . |
| -1.59 | Master_On_Line*New_Income_Breakdown 11 1 | -0.9292005 | 0.58303568 |   |
| -1.72 | Master_On_Line*New_Income_Breakdown 11 2 | -0.8412938 | 0.48924715 |   |
| -1.99 | Master_On_Line*New_Income_Breakdown 11 3 | -1.4134720 | 0.70996246 |   |

|       |        |                                          |            |            |
|-------|--------|------------------------------------------|------------|------------|
| 0.48  | 0.6304 | Master_On_Line*New_Income_Breakdown 11 4 | 0.1693657  | 0.35197344 |
| 0.53  | 0.5947 | Master_On_Line*New_Income_Breakdown 11 5 | 0.1401416  | 0.26341251 |
| 0.06  | 0.9558 | Master_On_Line*New_Income_Breakdown 11 6 | 0.0138892  | 0.25031000 |
| .     | .      | Master_On_Line*New_Income_Breakdown 11 7 | 0.0000000  | 0.00000000 |
| 0.12  | 0.9031 | Master_On_Line*New_Income_Breakdown 12 1 | 0.0406110  | 0.33348868 |
| 0.97  | 0.3329 | Master_On_Line*New_Income_Breakdown 12 2 | 0.1366936  | 0.14115593 |
| -0.47 | 0.6394 | Master_On_Line*New_Income_Breakdown 12 3 | -0.0552780 | 0.11795746 |
| 0.31  | 0.7561 | Master_On_Line*New_Income_Breakdown 12 4 | 0.0281733  | 0.09068499 |
| 1.87  | 0.0615 | Master_On_Line*New_Income_Breakdown 12 5 | 0.1371347  | 0.07333412 |
| -0.87 | 0.3837 | Master_On_Line*New_Income_Breakdown 12 6 | -0.0683270 | 0.07842441 |
| .     | .      | Master_On_Line*New_Income_Breakdown 12 7 | 0.0000000  | 0.00000000 |

## INTERACTION WITH EDUCATION

### Tests of Model Effects

| Effect                                 | Num DF | F Value | Pr > F |
|----------------------------------------|--------|---------|--------|
| Model                                  | 65     | 2.81    | <.0001 |
| Master_On_Line                         | 10     | 3.49    | 0.0001 |
| Master_On_Line*New_Education_Breakdown | 30     | 1.60    | 0.0198 |

### Estimated Regression Coefficients

| Parameter        | Standard Estimate | Error      | t Value | Pr >  t |
|------------------|-------------------|------------|---------|---------|
| Master_On_Line 1 | 0.2628574         | 0.13244905 | 1.98    | 0.0472  |
| Master_On_Line 2 | -0.2750621        | 0.25292598 | -1.09   | 0.2769  |
| Master_On_Line 3 | -0.3036186        | 0.15614067 | -1.94   | 0.0519  |
| Master_On_Line 4 | 0.1882333         | 0.17235300 | 1.09    | 0.2748  |
| Master_On_Line 6 | 0.1622321         | 0.08083844 | 2.01    | 0.0448  |
| Master_On_Line 7 | 0.1898871         | 0.22448743 | 0.85    | 0.3977  |
| Master_On_Line 8 | 0.3591828         | 0.10955715 | 3.28    | 0.0011  |
| Master_On_Line 9 | -0.3233309        | 0.17992343 | -1.80   | 0.0724  |

|                                            |            |            |       |        |
|--------------------------------------------|------------|------------|-------|--------|
| Master_On_Line 10                          | -0.3844254 | 0.26000586 | -1.48 | 0.1393 |
| Master_On_Line 11                          | -0.2096384 | 0.42008632 | -0.50 | 0.6178 |
| Master_On_Line 12                          | 0.0000000  | 0.00000000 | .     | .      |
| Master_On_Line*New_Education_Breakdown 1 1 | -0.3597536 | 0.21970966 |       |        |
| -1.64                                      | 0.1016     |            |       |        |
| Master_On_Line*New_Education_Breakdown 1 2 | -0.5294913 | 0.25346156 |       |        |
| -2.09                                      | 0.0368     |            |       |        |
| Master_On_Line*New_Education_Breakdown 1 3 | -0.4585509 | 0.16562947 |       |        |
| -2.77                                      | 0.0057     |            |       |        |
| Master_On_Line*New_Education_Breakdown 1 4 | 0.0000000  | 0.00000000 |       |        |
| .                                          | .          |            |       |        |
| Master_On_Line*New_Education_Breakdown 2 1 | 0.6085190  | 0.28066652 |       |        |
| 2.17                                       | 0.0302     |            |       |        |
| Master_On_Line*New_Education_Breakdown 2 2 | -0.3124306 | 0.45644062 |       |        |
| -0.68                                      | 0.4937     |            |       |        |
| Master_On_Line*New_Education_Breakdown 2 3 | 0.0906339  | 0.29444608 |       |        |
| 0.31                                       | 0.7582     |            |       |        |
| Master_On_Line*New_Education_Breakdown 2 4 | 0.0000000  | 0.00000000 |       |        |
| .                                          | .          |            |       |        |
| Master_On_Line*New_Education_Breakdown 3 1 | 0.1202943  | 0.23023756 |       |        |
| 0.52                                       | 0.6014     |            |       |        |
| Master_On_Line*New_Education_Breakdown 3 2 | 0.1686389  | 0.21572047 |       |        |
| 0.78                                       | 0.4344     |            |       |        |
| Master_On_Line*New_Education_Breakdown 3 3 | -0.2224252 | 0.19013602 |       |        |
| -1.17                                      | 0.2421     |            |       |        |
| Master_On_Line*New_Education_Breakdown 3 4 | 0.0000000  | 0.00000000 |       |        |
| .                                          | .          |            |       |        |
| Master_On_Line*New_Education_Breakdown 4 1 | -1.7032576 | 0.72327766 |       |        |
| -2.35                                      | 0.0186     |            |       |        |
| Master_On_Line*New_Education_Breakdown 4 2 | -0.4447072 | 0.26743651 |       |        |
| -1.66                                      | 0.0964     |            |       |        |
| Master_On_Line*New_Education_Breakdown 4 3 | -0.2756323 | 0.23291803 |       |        |
| -1.18                                      | 0.2367     |            |       |        |
| Master_On_Line*New_Education_Breakdown 4 4 | 0.0000000  | 0.00000000 |       |        |
| .                                          | .          |            |       |        |
| Master_On_Line*New_Education_Breakdown 6 1 | -0.2257540 | 0.11225855 |       |        |
| -2.01                                      | 0.0444     |            |       |        |
| Master_On_Line*New_Education_Breakdown 6 2 | -0.4009568 | 0.13021418 |       |        |
| -3.08                                      | 0.0021     |            |       |        |
| Master_On_Line*New_Education_Breakdown 6 3 | -0.2339346 | 0.08702754 |       |        |
| -2.69                                      | 0.0072     |            |       |        |
| Master_On_Line*New_Education_Breakdown 6 4 | 0.0000000  | 0.00000000 |       |        |
| .                                          | .          |            |       |        |
| Master_On_Line*New_Education_Breakdown 7 1 | 0.0555541  | 0.29769358 |       |        |
| 0.19                                       | 0.8520     |            |       |        |

|                                             |            |            |
|---------------------------------------------|------------|------------|
| Master_On_Line*New_Education_Breakdown 7 2  | -0.2323930 | 0.25807253 |
| -0.90 0.3679                                |            |            |
| Master_On_Line*New_Education_Breakdown 7 3  | -0.5637080 | 0.28233005 |
| -2.00 0.0459                                |            |            |
| Master_On_Line*New_Education_Breakdown 7 4  | 0.0000000  | 0.00000000 |
| .                                           |            |            |
| Master_On_Line*New_Education_Breakdown 8 1  | -0.4575946 | 0.32523718 |
| -1.41 0.1595                                |            |            |
| Master_On_Line*New_Education_Breakdown 8 2  | -0.5587373 | 0.21269505 |
| -2.63 0.0086                                |            |            |
| Master_On_Line*New_Education_Breakdown 8 3  | -0.4413266 | 0.15425127 |
| -2.86 0.0042                                |            |            |
| Master_On_Line*New_Education_Breakdown 8 4  | 0.0000000  | 0.00000000 |
| .                                           |            |            |
| Master_On_Line*New_Education_Breakdown 9 1  | -0.2131131 | 0.27416153 |
| -0.78 0.4370                                |            |            |
| Master_On_Line*New_Education_Breakdown 9 2  | -0.4065506 | 0.26872578 |
| -1.51 0.1304                                |            |            |
| Master_On_Line*New_Education_Breakdown 9 3  | -0.0862092 | 0.19481880 |
| -0.44 0.6581                                |            |            |
| Master_On_Line*New_Education_Breakdown 9 4  | 0.0000000  | 0.00000000 |
| .                                           |            |            |
| Master_On_Line*New_Education_Breakdown 10 1 | 0.4119570  | 0.39923997 |
| 1.03 0.3022                                 |            |            |
| Master_On_Line*New_Education_Breakdown 10 2 | -0.1435114 | 0.48640476 |
| -0.30 0.7680                                |            |            |
| Master_On_Line*New_Education_Breakdown 10 3 | 0.3353959  | 0.29580711 |
| 1.13 0.2569                                 |            |            |
| Master_On_Line*New_Education_Breakdown 10 4 | 0.0000000  | 0.00000000 |
| .                                           |            |            |
| Master_On_Line*New_Education_Breakdown 11 1 | -0.0608561 | 0.46983182 |
| -0.13 0.8969                                |            |            |
| Master_On_Line*New_Education_Breakdown 11 2 | 0.2752705  | 0.45575644 |
| 0.60 0.5459                                 |            |            |
| Master_On_Line*New_Education_Breakdown 11 3 | -0.0754899 | 0.46166105 |
| -0.16 0.8701                                |            |            |
| Master_On_Line*New_Education_Breakdown 11 4 | 0.0000000  | 0.00000000 |
| .                                           |            |            |
| Master_On_Line*New_Education_Breakdown 12 1 | -0.0089286 | 0.09609955 |
| -0.09 0.9260                                |            |            |
| Master_On_Line*New_Education_Breakdown 12 2 | -0.1602114 | 0.10620834 |
| -1.51 0.1315                                |            |            |
| Master_On_Line*New_Education_Breakdown 12 3 | -0.0975656 | 0.06062202 |
| -1.61 0.1076                                |            |            |
| Master_On_Line*New_Education_Breakdown 12 4 | 0.0000000  | 0.00000000 |
| .                                           |            |            |



## INTERACTION WITH RELIGION

## Tests of Model Effects

| Effect                                | Num DF | F Value | Pr > F |
|---------------------------------------|--------|---------|--------|
| Model                                 | 90     | 24.61   | <.0001 |
| Master_On_Line                        | 10     | 4.10    | <.0001 |
| Master_On_Line*New_Religion_Breakdown | 60     | 4.88    | <.0001 |

## Estimated Regression Coefficients

| Parameter                                 | Estimate   | Standard Error | t Value | Pr >  t |
|-------------------------------------------|------------|----------------|---------|---------|
| Master_On_Line 1                          | -0.3258488 | 0.29350481     | -1.11   | 0.2670  |
| Master_On_Line 2                          | -0.4379716 | 0.29791115     | -1.47   | 0.1416  |
| Master_On_Line 3                          | -0.0198962 | 0.26269249     | -0.08   | 0.9396  |
| Master_On_Line 4                          | -0.3547713 | 0.36136122     | -0.98   | 0.3263  |
| Master_On_Line 6                          | -0.1530546 | 0.22340906     | -0.69   | 0.4933  |
| Master_On_Line 7                          | -0.2912609 | 0.38649470     | -0.75   | 0.4511  |
| Master_On_Line 8                          | 0.2077262  | 0.28577788     | 0.73    | 0.4673  |
| Master_On_Line 9                          | -0.8357935 | 0.31501712     | -2.65   | 0.0080  |
| Master_On_Line 10                         | -1.1326998 | 0.16710535     | -6.78   | <.0001  |
| Master_On_Line 11                         | 0.2744746  | 0.37764494     | 0.73    | 0.4674  |
| Master_On_Line 12                         | 0.0000000  | 0.00000000     | .       | .       |
| Master_On_Line*New_Religion_Breakdown 1 1 | 0.6712155  | 0.28842706     |         |         |
| 2.33 0.0200                               |            |                |         |         |
| Master_On_Line*New_Religion_Breakdown 1 2 | 0.2448435  | 0.29427623     |         |         |
| 0.83 0.4054                               |            |                |         |         |
| Master_On_Line*New_Religion_Breakdown 1 3 | -0.7092045 | 0.68789932     |         |         |
| 1.03 0.3026                               |            |                |         |         |
| Master_On_Line*New_Religion_Breakdown 1 4 | 0.3386071  | 0.44119609     |         |         |
| 0.77 0.4428                               |            |                |         |         |
| Master_On_Line*New_Religion_Breakdown 1 5 | 0.5075058  | 0.28842118     |         |         |
| 1.76 0.0785                               |            |                |         |         |
| Master_On_Line*New_Religion_Breakdown 1 6 | 0.0313074  | 0.29494083     |         |         |
| 0.11 0.9155                               |            |                |         |         |
| Master_On_Line*New_Religion_Breakdown 1 7 | 0.0000000  | 0.00000000     |         |         |
| .                                         |            |                |         |         |
| Master_On_Line*New_Religion_Breakdown 2 1 | 0.5671805  | 0.31708222     |         |         |
| 1.79 0.0737                               |            |                |         |         |
| Master_On_Line*New_Religion_Breakdown 2 2 | 0.6005944  | 0.32419673     |         |         |
| 1.85 0.0640                               |            |                |         |         |
| Master_On_Line*New_Religion_Breakdown 2 3 | 0.3682384  | 0.39190590     |         |         |
| 0.94 0.3475                               |            |                |         |         |

|      |        |                                           |            |            |   |
|------|--------|-------------------------------------------|------------|------------|---|
| 2.86 | 0.0043 | Master_On_Line*New_Religion_Breakdown 2 4 | -0.7703396 | 0.26970020 | - |
| 0.67 | 0.5011 | Master_On_Line*New_Religion_Breakdown 2 5 | 0.3183729  | 0.47324859 |   |
| 1.07 | 0.2830 | Master_On_Line*New_Religion_Breakdown 2 6 | 0.4669495  | 0.43490830 |   |
| .    | .      | Master_On_Line*New_Religion_Breakdown 2 7 | 0.0000000  | 0.00000000 |   |
| 0.03 | 0.9790 | Master_On_Line*New_Religion_Breakdown 3 1 | -0.0071517 | 0.27162341 | - |
| 1.73 | 0.0846 | Master_On_Line*New_Religion_Breakdown 3 2 | -0.4487877 | 0.26013845 | - |
| 0.25 | 0.8024 | Master_On_Line*New_Religion_Breakdown 3 3 | 0.1088567  | 0.43500810 |   |
| 0.87 | 0.3858 | Master_On_Line*New_Religion_Breakdown 3 4 | 0.3121588  | 0.35992912 |   |
| 0.03 | 0.9783 | Master_On_Line*New_Religion_Breakdown 3 5 | -0.0075914 | 0.27859861 | - |
| 0.51 | 0.6069 | Master_On_Line*New_Religion_Breakdown 3 6 | -0.1718907 | 0.33408069 | - |
| .    | .      | Master_On_Line*New_Religion_Breakdown 3 7 | 0.0000000  | 0.00000000 |   |
| 0.19 | 0.8492 | Master_On_Line*New_Religion_Breakdown 4 1 | 0.0880541  | 0.46299935 |   |
| 0.87 | 0.3856 | Master_On_Line*New_Religion_Breakdown 4 2 | 0.3318488  | 0.38242046 |   |
| 1.46 | 0.1432 | Master_On_Line*New_Religion_Breakdown 4 3 | 0.5587329  | 0.38163512 |   |
| 0.03 | 0.9748 | Master_On_Line*New_Religion_Breakdown 4 4 | 0.0179147  | 0.56668882 |   |
| 0.74 | 0.4599 | Master_On_Line*New_Religion_Breakdown 4 5 | 0.3114458  | 0.42141956 |   |
| 1.84 | 0.0657 | Master_On_Line*New_Religion_Breakdown 4 6 | 0.7946879  | 0.43171325 |   |
| .    | .      | Master_On_Line*New_Religion_Breakdown 4 7 | 0.0000000  | 0.00000000 |   |
| 0.56 | 0.5734 | Master_On_Line*New_Religion_Breakdown 6 1 | 0.1168495  | 0.20750598 |   |
| 1.46 | 0.1456 | Master_On_Line*New_Religion_Breakdown 6 2 | 0.2693166  | 0.18503478 |   |
| 0.97 | 0.3313 | Master_On_Line*New_Religion_Breakdown 6 3 | 0.2375370  | 0.24446457 |   |
| 0.05 | 0.9638 | Master_On_Line*New_Religion_Breakdown 6 4 | 0.0125482  | 0.27637255 |   |
| 1.24 | 0.2136 | Master_On_Line*New_Religion_Breakdown 6 5 | 0.2447534  | 0.19678196 |   |

|      |        |                                           |            |            |   |
|------|--------|-------------------------------------------|------------|------------|---|
| 1.70 | 0.0898 | Master_On_Line*New_Religion_Breakdown 6 6 | 0.3287866  | 0.19377721 |   |
|      |        | Master_On_Line*New_Religion_Breakdown 6 7 | 0.0000000  | 0.00000000 |   |
| 1.21 | 0.2271 | Master_On_Line*New_Religion_Breakdown 7 1 | 0.4890122  | 0.40479054 |   |
| 0.68 | 0.4943 | Master_On_Line*New_Religion_Breakdown 7 2 | 0.2856646  | 0.41791829 |   |
| 1.02 | 0.3091 | Master_On_Line*New_Religion_Breakdown 7 3 | 0.4205125  | 0.41337906 |   |
| 1.03 | 0.3035 | Master_On_Line*New_Religion_Breakdown 7 4 | -0.7228750 | 0.70242715 | - |
| 0.20 | 0.8391 | Master_On_Line*New_Religion_Breakdown 7 5 | 0.0924705  | 0.45542495 |   |
| 1.09 | 0.2768 | Master_On_Line*New_Religion_Breakdown 7 6 | 0.4394938  | 0.40405144 |   |
|      |        | Master_On_Line*New_Religion_Breakdown 7 7 | 0.0000000  | 0.00000000 |   |
| 0.34 | 0.7323 | Master_On_Line*New_Religion_Breakdown 8 1 | 0.1024446  | 0.29945468 |   |
| 0.94 | 0.3468 | Master_On_Line*New_Religion_Breakdown 8 2 | -0.2721125 | 0.28918133 | - |
| 0.79 | 0.4298 | Master_On_Line*New_Religion_Breakdown 8 3 | -0.3054104 | 0.38683301 | - |
| 0.84 | 0.4035 | Master_On_Line*New_Religion_Breakdown 8 4 | 0.2170753  | 0.25985183 |   |
| 0.70 | 0.4830 | Master_On_Line*New_Religion_Breakdown 8 5 | -0.2718122 | 0.38749256 | - |
| 0.21 | 0.8306 | Master_On_Line*New_Religion_Breakdown 8 6 | -0.0730661 | 0.34157499 | - |
|      |        | Master_On_Line*New_Religion_Breakdown 8 7 | 0.0000000  | 0.00000000 |   |
| 2.76 | 0.0058 | Master_On_Line*New_Religion_Breakdown 9 1 | 0.8464112  | 0.30683564 |   |
| 0.95 | 0.3415 | Master_On_Line*New_Religion_Breakdown 9 2 | 0.2958523  | 0.31097152 |   |
| 0.88 | 0.3767 | Master_On_Line*New_Religion_Breakdown 9 3 | 0.3320254  | 0.37556937 |   |
| 1.11 | 0.2684 | Master_On_Line*New_Religion_Breakdown 9 4 | -0.4213106 | 0.38059941 | - |
| 3.03 | 0.0024 | Master_On_Line*New_Religion_Breakdown 9 5 | 0.9585566  | 0.31620016 |   |
| 1.36 | 0.1739 | Master_On_Line*New_Religion_Breakdown 9 6 | 0.5298269  | 0.38961547 |   |
|      |        | Master_On_Line*New_Religion_Breakdown 9 7 | 0.0000000  | 0.00000000 |   |

|       |        |                                            |            |            |
|-------|--------|--------------------------------------------|------------|------------|
| 7.64  | <.0001 | Master_On_Line*New_Religion_Breakdown 10 1 | 1.7440550  | 0.22833457 |
| 4.44  | <.0001 | Master_On_Line*New_Religion_Breakdown 10 2 | 0.9659768  | 0.21738801 |
| 8.79  | <.0001 | Master_On_Line*New_Religion_Breakdown 10 3 | 1.3257095  | 0.15074403 |
| 0.72  | 0.4717 | Master_On_Line*New_Religion_Breakdown 10 4 | 0.3524318  | 0.48966514 |
| 5.69  | <.0001 | Master_On_Line*New_Religion_Breakdown 10 5 | 1.4293780  | 0.25142353 |
| 4.25  | <.0001 | Master_On_Line*New_Religion_Breakdown 10 6 | 1.1052346  | 0.25991999 |
| .     | .      | Master_On_Line*New_Religion_Breakdown 10 7 | 0.0000000  | 0.00000000 |
| -0.83 | 0.4042 | Master_On_Line*New_Religion_Breakdown 11 1 | -0.3722699 | 0.44622589 |
| -1.09 | 0.2743 | Master_On_Line*New_Religion_Breakdown 11 2 | -0.4358429 | 0.39867062 |
| 1.46  | 0.1452 | Master_On_Line*New_Religion_Breakdown 11 3 | 0.5410155  | 0.37131659 |
| -0.23 | 0.8146 | Master_On_Line*New_Religion_Breakdown 11 4 | -0.0928206 | 0.39590904 |
| -1.03 | 0.3054 | Master_On_Line*New_Religion_Breakdown 11 5 | -0.4319115 | 0.42135683 |
| -1.02 | 0.3080 | Master_On_Line*New_Religion_Breakdown 11 6 | -0.4534355 | 0.44470478 |
| .     | .      | Master_On_Line*New_Religion_Breakdown 11 7 | 0.0000000  | 0.00000000 |
| 1.00  | 0.3187 | Master_On_Line*New_Religion_Breakdown 12 1 | 0.1390695  | 0.13945311 |
| 0.34  | 0.7340 | Master_On_Line*New_Religion_Breakdown 12 2 | 0.0472816  | 0.13912778 |
| 0.31  | 0.7594 | Master_On_Line*New_Religion_Breakdown 12 3 | 0.0588785  | 0.19221214 |
| -1.37 | 0.1704 | Master_On_Line*New_Religion_Breakdown 12 4 | -0.5037435 | 0.36743944 |
| 0.62  | 0.5339 | Master_On_Line*New_Religion_Breakdown 12 5 | 0.0949355  | 0.15259817 |
| -0.74 | 0.4583 | Master_On_Line*New_Religion_Breakdown 12 6 | -0.1343538 | 0.18115228 |
| .     | .      | Master_On_Line*New_Religion_Breakdown 12 7 | 0.0000000  | 0.00000000 |

## INTERACTION WITH EMPLOYMENT

### Tests of Model Effects

| Effect                 | Num DF | F Value | Pr > F |
|------------------------|--------|---------|--------|
| Model                  | 63     | 19.25   | <.0001 |
| Master_On_Line         | 10     | 1.65    | 0.0874 |
| Master_On_Line*working | 31     | 3.17    | <.0001 |

## Estimated Regression Coefficients

| Parameter                  | Standard Estimate | Error      | t Value | Pr >  t |
|----------------------------|-------------------|------------|---------|---------|
| Master_On_Line 1           | 0.0017374         | 0.13959037 | 0.01    | 0.9901  |
| Master_On_Line 2           | 0.2747618         | 0.16032185 | 1.71    | 0.0866  |
| Master_On_Line 3           | -0.0660711        | 0.13704474 | -0.48   | 0.6297  |
| Master_On_Line 4           | -0.2670562        | 0.25624817 | -1.04   | 0.2974  |
| Master_On_Line 6           | -0.0028373        | 0.10446021 | -0.03   | 0.9783  |
| Master_On_Line 7           | -0.2846319        | 0.32255140 | -0.88   | 0.3776  |
| Master_On_Line 8           | -0.0792143        | 0.26910417 | -0.29   | 0.7685  |
| Master_On_Line 9           | -0.2280837        | 0.18442646 | -1.24   | 0.2162  |
| Master_On_Line 10          | -0.1843679        | 0.35794635 | -0.52   | 0.6065  |
| Master_On_Line 11          | -0.0444836        | 0.18427492 | -0.24   | 0.8093  |
| Master_On_Line 12          | 0.0000000         | 0.00000000 | .       | .       |
| Master_On_Line*working 1 0 | -0.3575713        | 0.34782611 | -1.03   |         |
| 0.3040                     |                   |            |         |         |
| Master_On_Line*working 1 1 | -0.0347480        | 0.15935205 | -0.22   |         |
| 0.8274                     |                   |            |         |         |
| Master_On_Line*working 1 2 | -0.7124970        | 0.53146932 | -1.34   |         |
| 0.1801                     |                   |            |         |         |
| Master_On_Line*working 1 3 | 0.0000000         | 0.00000000 | .       | .       |
| Master_On_Line*working 2 0 | -0.6394896        | 0.47623584 | -1.34   |         |
| 0.1794                     |                   |            |         |         |
| Master_On_Line*working 2 1 | -0.3007030        | 0.20638261 | -1.46   |         |
| 0.1452                     |                   |            |         |         |
| Master_On_Line*working 2 2 | -0.8195477        | 0.28016028 | -2.93   |         |
| 0.0035                     |                   |            |         |         |
| Master_On_Line*working 2 3 | 0.0000000         | 0.00000000 | .       | .       |
| Master_On_Line*working 3 0 | 0.2354569         | 0.19351036 | 1.22    | 0.2237  |
| Master_On_Line*working 3 1 | -0.3056806        | 0.15429282 | -1.98   |         |
| 0.0476                     |                   |            |         |         |
| Master_On_Line*working 3 2 | 0.2040802         | 0.28518859 | 0.72    | 0.4743  |
| Master_On_Line*working 3 3 | 0.0000000         | 0.00000000 | .       | .       |
| Master_On_Line*working 4 1 | 0.1568752         | 0.29070833 | 0.54    | 0.5895  |
| Master_On_Line*working 4 3 | 0.0000000         | 0.00000000 | .       | .       |
| Master_On_Line*working 6 0 | 0.0581684         | 0.23580562 | 0.25    | 0.8052  |

|        |                             |            |            |       |        |
|--------|-----------------------------|------------|------------|-------|--------|
| 0.8847 | Master_On_Line*working 6 1  | -0.0136150 | 0.09384667 | -0.15 |        |
|        | Master_On_Line*working 6 2  | 0.2978911  | 0.20026756 | 1.49  | 0.1370 |
|        | Master_On_Line*working 6 3  | 0.0000000  | 0.00000000 | .     | .      |
| 0.1788 | Master_On_Line*working 7 0  | -1.3930593 | 1.03599673 | -1.34 |        |
|        | Master_On_Line*working 7 1  | 0.2490599  | 0.33638116 | 0.74  | 0.4591 |
|        | Master_On_Line*working 7 2  | 0.9301138  | 0.33074302 | 2.81  | 0.0049 |
|        | Master_On_Line*working 7 3  | 0.0000000  | 0.00000000 | .     | .      |
|        | Master_On_Line*working 8 0  | 0.4752504  | 0.39436549 | 1.21  | 0.2282 |
|        | Master_On_Line*working 8 1  | 0.1353046  | 0.27710430 | 0.49  | 0.6254 |
| 0.2286 | Master_On_Line*working 8 2  | -0.5438269 | 0.45164241 | -1.20 |        |
|        | Master_On_Line*working 8 3  | 0.0000000  | 0.00000000 | .     | .      |
| 0.2371 | Master_On_Line*working 9 0  | -0.5756075 | 0.48677317 | -1.18 |        |
|        | Master_On_Line*working 9 1  | -0.2178235 | 0.19227520 | -1.13 |        |
| 0.2573 | Master_On_Line*working 9 2  | 0.3107943  | 0.25443878 | 1.22  | 0.2220 |
|        | Master_On_Line*working 9 3  | 0.0000000  | 0.00000000 | .     | .      |
| 0.6991 | Master_On_Line*working 10 0 | 0.2452676  | 0.63452752 | 0.39  |        |
| 0.8549 | Master_On_Line*working 10 1 | 0.0688979  | 0.37671208 | 0.18  |        |
| 0.0241 | Master_On_Line*working 10 2 | 0.8225564  | 0.36447334 | 2.26  |        |
|        | Master_On_Line*working 10 3 | 0.0000000  | 0.00000000 | .     | .      |
| 0.2859 | Master_On_Line*working 11 0 | -0.5949655 | 0.55752064 | -1.07 |        |
| 0.7337 | Master_On_Line*working 11 1 | -0.0715015 | 0.21012375 | -0.34 |        |
| 0.9905 | Master_On_Line*working 11 2 | 0.0086251  | 0.72545334 | 0.01  |        |
|        | Master_On_Line*working 11 3 | 0.0000000  | 0.00000000 | .     | .      |
| 0.2454 | Master_On_Line*working 12 0 | 0.1859880  | 0.16008204 | 1.16  |        |
| 0.6471 | Master_On_Line*working 12 1 | -0.0343203 | 0.07495960 | -0.46 |        |
| 0.7499 | Master_On_Line*working 12 2 | -0.0500329 | 0.15691528 | -0.32 |        |
|        | Master_On_Line*working 12 3 | 0.0000000  | 0.00000000 | .     | .      |

Does meeting in different OFFLINE VENUES (variable name "master\_off\_line") predict marital satisfaction?

## WITHOUT INTERACTIONS

## Tests of Model Effects

| Effect          | Num DF | F Value | Pr > F |
|-----------------|--------|---------|--------|
| Model           | 34     | 5.01    | <.0001 |
| Master_Off_Line | 9      | 3.87    | <.0001 |

## Estimated Regression Coefficients

| Parameter          | Standard   |            | t Value | Pr >  t |
|--------------------|------------|------------|---------|---------|
|                    | Estimate   | Error      |         |         |
| Master_Off_Line 12 | -0.0434278 | 0.06321804 | -0.69   | 0.4921  |
| Master_Off_Line 13 | 0.0257143  | 0.06382206 | 0.40    | 0.6870  |
| Master_Off_Line 14 | 0.1206964  | 0.06950487 | 1.74    | 0.0825  |
| Master_Off_Line 15 | 0.0083986  | 0.08148036 | 0.10    | 0.9179  |
| Master_Off_Line 16 | -0.0316651 | 0.07278943 | -0.44   | 0.6636  |
| Master_Off_Line 17 | 0.1029081  | 0.07710243 | 1.33    | 0.1820  |
| Master_Off_Line 18 | 0.1219393  | 0.07197364 | 1.69    | 0.0903  |
| Master_Off_Line 19 | 0.2143723  | 0.07270712 | 2.95    | 0.0032  |
| Master_Off_Line 20 | -0.1457205 | 0.11882708 | -1.23   | 0.2201  |
| Master_Off_Line 21 | 0.0000000  | 0.00000000 | .       | .       |

## INTERACTION WITH YEAR

## Tests of Model Effects

| Effect               | Num DF | F Value | Pr > F |
|----------------------|--------|---------|--------|
| Model                | 43     | 4.61    | <.0001 |
| Master_Off_Line      | 9      | 1.95    | 0.0411 |
| Year*Master_Off_Line | 10     | 6.34    | <.0001 |

## Estimated Regression Coefficients

| Parameter          | Standard  |            | t Value | Pr >  t |
|--------------------|-----------|------------|---------|---------|
|                    | Estimate  | Error      |         |         |
| Master_Off_Line 12 | 0.1493409 | 0.16383393 | 0.91    | 0.3620  |
| Master_Off_Line 13 | 0.3284828 | 0.16272918 | 2.02    | 0.0436  |
| Master_Off_Line 14 | 0.2403790 | 0.17616129 | 1.36    | 0.1724  |
| Master_Off_Line 15 | 0.2876190 | 0.19522537 | 1.47    | 0.1407  |
| Master_Off_Line 16 | 0.2022475 | 0.18881213 | 1.07    | 0.2841  |
| Master_Off_Line 17 | 0.6088035 | 0.18374268 | 3.31    | 0.0009  |
| Master_Off_Line 18 | 0.3469637 | 0.17680901 | 1.96    | 0.0497  |
| Master_Off_Line 19 | 0.2779374 | 0.18236583 | 1.52    | 0.1275  |

|                         |            |            |       |        |
|-------------------------|------------|------------|-------|--------|
| Master_Off_Line 20      | -0.0949233 | 0.33390699 | -0.28 | 0.7762 |
| Master_Off_Line 21      | 0.0000000  | 0.00000000 | .     | .      |
| Year*Master_Off_Line 12 | -0.0420846 | 0.01507141 | -2.79 | 0.0052 |
| Year*Master_Off_Line 13 | -0.0626947 | 0.01419774 | -4.42 | <.0001 |
| Year*Master_Off_Line 14 | -0.0281903 | 0.01639712 | -1.72 | 0.0856 |
| Year*Master_Off_Line 15 | -0.0574193 | 0.02481778 | -2.31 | 0.0207 |
| Year*Master_Off_Line 16 | -0.0496128 | 0.02185276 | -2.27 | 0.0232 |
| Year*Master_Off_Line 17 | -0.1006897 | 0.02388972 | -4.21 | <.0001 |
| Year*Master_Off_Line 18 | -0.0480299 | 0.01819365 | -2.64 | 0.0083 |
| Year*Master_Off_Line 19 | -0.0176385 | 0.02032057 | -0.87 | 0.3854 |
| Year*Master_Off_Line 20 | -0.0172908 | 0.04449860 | -0.39 | 0.6976 |
| Year*Master_Off_Line 21 | -0.0067225 | 0.02503044 | -0.27 | 0.7883 |

## INTERACTION WITH GENDER

## Tests of Model Effects

| Effect                 | Num DF | F Value | Pr > F |
|------------------------|--------|---------|--------|
| Model                  | 43     | 4.09    | <.0001 |
| Master_Off_Line        | 9      | 2.04    | 0.0310 |
| Year                   | 1      | 43.54   | <.0001 |
| Gender*Master_Off_Line | 10     | 1.25    | 0.2518 |

## Estimated Regression Coefficients

| Parameter                 | Estimate   | Standard Error | t Value | Pr >  t |
|---------------------------|------------|----------------|---------|---------|
| Master_Off_Line 12        | -0.1444413 | 0.21876791     | -0.66   | 0.5091  |
| Master_Off_Line 13        | 0.2008623  | 0.21521392     | 0.93    | 0.3507  |
| Master_Off_Line 14        | 0.1833215  | 0.21872895     | 0.84    | 0.4020  |
| Master_Off_Line 15        | -0.1018390 | 0.29171672     | -0.35   | 0.7270  |
| Master_Off_Line 16        | -0.0666733 | 0.25198983     | -0.26   | 0.7913  |
| Master_Off_Line 17        | 0.1283016  | 0.26680630     | 0.48    | 0.6306  |
| Master_Off_Line 18        | 0.2487664  | 0.23898386     | 1.04    | 0.2979  |
| Master_Off_Line 19        | 0.4961351  | 0.24468644     | 2.03    | 0.0426  |
| Master_Off_Line 20        | -0.6034988 | 0.42219909     | -1.43   | 0.1529  |
| Master_Off_Line 21        | 0.0000000  | 0.00000000     | .       | .       |
| Gender*Master_Off_Line 12 | 0.0358468  | 0.06797765     | 0.53    | 0.5980  |
| Gender*Master_Off_Line 13 | -0.1396313 | 0.06751843     | -2.07   | 0.0387  |
| Gender*Master_Off_Line 14 | -0.0680769 | 0.07486191     | -0.91   | 0.3632  |
| Gender*Master_Off_Line 15 | 0.0405717  | 0.12630962     | 0.32    | 0.7481  |



|        |                           |            |            |       |
|--------|---------------------------|------------|------------|-------|
| 0.9499 | Gender*Master_Off_Line 16 | -0.0063846 | 0.10161725 | -0.06 |
| 0.6934 | Gender*Master_Off_Line 17 | -0.0446684 | 0.11329519 | -0.39 |
| 0.2375 | Gender*Master_Off_Line 18 | -0.1103678 | 0.09341880 | -1.18 |
| 0.0305 | Gender*Master_Off_Line 19 | -0.2102958 | 0.09715970 | -2.16 |
| 0.2238 | Gender*Master_Off_Line 20 | 0.2632098  | 0.21635524 | 1.22  |
| 0.7890 | Gender*Master_Off_Line 21 | -0.0292766 | 0.10939785 | -0.27 |

## INTERACTION WITH AGE

## Tests of Model Effects

| Effect              | Num DF | F Value | Pr > F |
|---------------------|--------|---------|--------|
| Model               | 43     | 4.74    | <.0001 |
| Master_Off_Line     | 9      | 2.56    | 0.0062 |
| Age*Master_Off_Line | 9      | 0.99    | 0.4488 |

## Estimated Regression Coefficients

| Parameter              | Estimate   | Standard Error | t Value | Pr >  t |
|------------------------|------------|----------------|---------|---------|
| Master_Off_Line 12     | -0.0589553 | 0.20977266     | -0.28   | 0.7787  |
| Master_Off_Line 13     | 0.0395514  | 0.20762311     | 0.19    | 0.8489  |
| Master_Off_Line 14     | 0.4372709  | 0.25044898     | 1.75    | 0.0808  |
| Master_Off_Line 15     | -0.0875542 | 0.26595128     | -0.33   | 0.7420  |
| Master_Off_Line 16     | 0.0376961  | 0.24399177     | 0.15    | 0.8772  |
| Master_Off_Line 17     | 0.3390177  | 0.23100388     | 1.47    | 0.1422  |
| Master_Off_Line 18     | 0.1980374  | 0.21842049     | 0.91    | 0.3646  |
| Master_Off_Line 19     | 0.6078153  | 0.21598309     | 2.81    | 0.0049  |
| Master_Off_Line 20     | -0.0157479 | 0.32455014     | -0.05   | 0.9613  |
| Master_Off_Line 21     | 0.0000000  | 0.00000000     | .       | .       |
| Age*Master_Off_Line 12 | -0.0022558 | 0.00330480     | -0.68   | 0.4949  |
| Age*Master_Off_Line 13 | -0.0028847 | 0.00344442     | -0.84   | 0.4023  |
| Age*Master_Off_Line 14 | -0.0123183 | 0.00647904     | -1.90   | 0.0573  |
| Age*Master_Off_Line 15 | -0.0000634 | 0.00596077     | -0.01   | 0.9915  |
| Age*Master_Off_Line 16 | -0.0044313 | 0.00458623     | -0.97   | 0.3340  |
| Age*Master_Off_Line 17 | -0.0088980 | 0.00469909     | -1.89   | 0.0583  |
| Age*Master_Off_Line 18 | -0.0045855 | 0.00442910     | -1.04   | 0.3005  |
| Age*Master_Off_Line 19 | -0.0132874 | 0.00393069     | -3.38   | 0.0007  |
| Age*Master_Off_Line 20 | -0.0059595 | 0.00722661     | -0.82   | 0.4096  |

|                        |            |            |       |        |
|------------------------|------------|------------|-------|--------|
| Age*Master_Off_Line 21 | -0.0028869 | 0.00395208 | -0.73 | 0.4651 |
|------------------------|------------|------------|-------|--------|

## INTERACTION WITH ETHNICITY

## Tests of Model Effects

| Effect                                  | Num DF | F Value | Pr > F |
|-----------------------------------------|--------|---------|--------|
| Model                                   | 70     | 3.22    | <.0001 |
| Master_Off_Line                         | 9      | 2.06    | 0.0294 |
| Master_Off_Line*New_Ethnicity_Breakdown | 36     | 1.24    | 0.1563 |

## Estimated Regression Coefficients

| Parameter                                    | Standard Estimate | Error      | t Value    | Pr >  t    |
|----------------------------------------------|-------------------|------------|------------|------------|
| Master_Off_Line 12                           | 0.6304609         | 0.69157492 | 0.91       | 0.3620     |
| Master_Off_Line 13                           | 0.4981629         | 0.69662858 | 0.72       | 0.4746     |
| Master_Off_Line 14                           | 0.4672204         | 0.70555159 | 0.66       | 0.5079     |
| Master_Off_Line 15                           | 0.0663012         | 0.80387456 | 0.08       | 0.9343     |
| Master_Off_Line 16                           | 1.0403052         | 0.67451758 | 1.54       | 0.1230     |
| Master_Off_Line 17                           | 0.9853985         | 0.68689980 | 1.43       | 0.1514     |
| Master_Off_Line 18                           | 1.1747476         | 0.67390604 | 1.74       | 0.0813     |
| Master_Off_Line 19                           | 0.8143820         | 0.69706481 | 1.17       | 0.2427     |
| Master_Off_Line 20                           | 0.6592803         | 0.75071554 | 0.88       | 0.3799     |
| Master_Off_Line 21                           | 0.0000000         | 0.00000000 | .          | .          |
| Master_Off_Line*New_Ethnicity_Breakdown 12 1 | -0.20             | 0.8416     | -0.0491939 | 0.24613819 |
| Master_Off_Line*New_Ethnicity_Breakdown 12 2 | -0.59             | 0.5546     | -0.1610427 | 0.27256361 |
| Master_Off_Line*New_Ethnicity_Breakdown 12 3 | -0.40             | 0.6922     | -0.1039546 | 0.26260094 |
| Master_Off_Line*New_Ethnicity_Breakdown 12 4 | 0.69              | 0.4924     | 0.1880056  | 0.27386593 |
| Master_Off_Line*New_Ethnicity_Breakdown 12 5 | .                 | .          | 0.0000000  | 0.00000000 |
| Master_Off_Line*New_Ethnicity_Breakdown 13 1 | 0.62              | 0.5379     | 0.1594795  | 0.25886488 |
| Master_Off_Line*New_Ethnicity_Breakdown 13 2 | 0.30              | 0.7631     | 0.0888474  | 0.29481743 |
| Master_Off_Line*New_Ethnicity_Breakdown 13 3 | 0.35              | 0.7237     | 0.0981108  | 0.27755677 |
| Master_Off_Line*New_Ethnicity_Breakdown 13 4 | 0.21              | 0.8347     | 0.0604333  | 0.28964367 |
| Master_Off_Line*New_Ethnicity_Breakdown 13 5 | .                 | .          | 0.0000000  | 0.00000000 |

|                                         |        |            |            |
|-----------------------------------------|--------|------------|------------|
| Master_Off_Line*New_Ethnicity_Breakdown | 14 1   | 0.3007651  | 0.28343662 |
| 1.06                                    | 0.2886 |            |            |
| Master_Off_Line*New_Ethnicity_Breakdown | 14 2   | -0.0677849 | 0.37316065 |
| -0.18                                   | 0.8559 |            |            |
| Master_Off_Line*New_Ethnicity_Breakdown | 14 3   | 0.2498374  | 0.30100644 |
| 0.83                                    | 0.4066 |            |            |
| Master_Off_Line*New_Ethnicity_Breakdown | 14 4   | 0.3895355  | 0.31159647 |
| 1.25                                    | 0.2113 |            |            |
| Master_Off_Line*New_Ethnicity_Breakdown | 14 5   | 0.0000000  | 0.00000000 |
| .                                       | .      |            |            |
| Master_Off_Line*New_Ethnicity_Breakdown | 15 1   | 0.6304662  | 0.48295854 |
| 1.31                                    | 0.1918 |            |            |
| Master_Off_Line*New_Ethnicity_Breakdown | 15 2   | 0.3425633  | 0.51266180 |
| 0.67                                    | 0.5040 |            |            |
| Master_Off_Line*New_Ethnicity_Breakdown | 15 3   | 0.5081401  | 0.50052631 |
| 1.02                                    | 0.3100 |            |            |
| Master_Off_Line*New_Ethnicity_Breakdown | 15 4   | 0.2878651  | 0.49092826 |
| 0.59                                    | 0.5576 |            |            |
| Master_Off_Line*New_Ethnicity_Breakdown | 15 5   | 0.0000000  | 0.00000000 |
| .                                       | .      |            |            |
| Master_Off_Line*New_Ethnicity_Breakdown | 16 1   | -0.4249755 | 0.19775400 |
| -2.15                                   | 0.0317 |            |            |
| Master_Off_Line*New_Ethnicity_Breakdown | 16 2   | -0.6802674 | 0.31994336 |
| -2.13                                   | 0.0335 |            |            |
| Master_Off_Line*New_Ethnicity_Breakdown | 16 3   | -0.5632177 | 0.23658223 |
| -2.38                                   | 0.0173 |            |            |
| Master_Off_Line*New_Ethnicity_Breakdown | 16 4   | -0.2027506 | 0.26098519 |
| -0.78                                   | 0.4373 |            |            |
| Master_Off_Line*New_Ethnicity_Breakdown | 16 5   | 0.0000000  | 0.00000000 |
| .                                       | .      |            |            |
| Master_Off_Line*New_Ethnicity_Breakdown | 17 1   | -0.2199794 | 0.23949885 |
| -0.92                                   | 0.3584 |            |            |
| Master_Off_Line*New_Ethnicity_Breakdown | 17 2   | -0.3503696 | 0.28312753 |
| -1.24                                   | 0.2159 |            |            |
| Master_Off_Line*New_Ethnicity_Breakdown | 17 3   | -0.4634432 | 0.29578917 |
| -1.57                                   | 0.1172 |            |            |
| Master_Off_Line*New_Ethnicity_Breakdown | 17 4   | -0.4940858 | 0.38680473 |
| -1.28                                   | 0.2015 |            |            |
| Master_Off_Line*New_Ethnicity_Breakdown | 17 5   | 0.0000000  | 0.00000000 |
| .                                       | .      |            |            |
| Master_Off_Line*New_Ethnicity_Breakdown | 18 1   | -0.4147096 | 0.19287225 |
| -2.15                                   | 0.0316 |            |            |
| Master_Off_Line*New_Ethnicity_Breakdown | 18 2   | -0.6613739 | 0.33816493 |
| -1.96                                   | 0.0505 |            |            |
| Master_Off_Line*New_Ethnicity_Breakdown | 18 3   | -0.4729931 | 0.21395358 |
| -2.21                                   | 0.0271 |            |            |

|                                         |        |            |            |
|-----------------------------------------|--------|------------|------------|
| Master_Off_Line*New_Ethnicity_Breakdown | 18 4   | -0.3499059 | 0.20960655 |
| -1.67                                   | 0.0951 |            |            |
| Master_Off_Line*New_Ethnicity_Breakdown | 18 5   | 0.0000000  | 0.00000000 |
| .                                       | .      |            |            |
| Master_Off_Line*New_Ethnicity_Breakdown | 19 1   | -0.0140789 | 0.26401691 |
| -0.05                                   | 0.9575 |            |            |
| Master_Off_Line*New_Ethnicity_Breakdown | 19 2   | -0.1828614 | 0.31435151 |
| -0.58                                   | 0.5608 |            |            |
| Master_Off_Line*New_Ethnicity_Breakdown | 19 3   | 0.2226294  | 0.28670586 |
| 0.78                                    | 0.4375 |            |            |
| Master_Off_Line*New_Ethnicity_Breakdown | 19 4   | -0.0917491 | 0.37445187 |
| -0.25                                   | 0.8064 |            |            |
| Master_Off_Line*New_Ethnicity_Breakdown | 19 5   | 0.0000000  | 0.00000000 |
| .                                       | .      |            |            |
| Master_Off_Line*New_Ethnicity_Breakdown | 20 1   | -0.2199551 | 0.40226870 |
| -0.55                                   | 0.5845 |            |            |
| Master_Off_Line*New_Ethnicity_Breakdown | 20 2   | -0.0672423 | 0.45166585 |
| -0.15                                   | 0.8817 |            |            |
| Master_Off_Line*New_Ethnicity_Breakdown | 20 3   | 0.2699408  | 0.47500451 |
| 0.57                                    | 0.5698 |            |            |
| Master_Off_Line*New_Ethnicity_Breakdown | 20 4   | -0.6597420 | 0.50871455 |
| -1.30                                   | 0.1947 |            |            |
| Master_Off_Line*New_Ethnicity_Breakdown | 20 5   | 0.0000000  | 0.00000000 |
| .                                       | .      |            |            |
| Master_Off_Line*New_Ethnicity_Breakdown | 21 1   | 0.6803941  | 0.64982265 |
| 1.05                                    | 0.2951 |            |            |
| Master_Off_Line*New_Ethnicity_Breakdown | 21 2   | 0.4281681  | 0.67391652 |
| 0.64                                    | 0.5252 |            |            |
| Master_Off_Line*New_Ethnicity_Breakdown | 21 3   | 0.5144254  | 0.66670316 |
| 0.77                                    | 0.4404 |            |            |
| Master_Off_Line*New_Ethnicity_Breakdown | 21 4   | -0.0899060 | 0.72283295 |
| -0.12                                   | 0.9010 |            |            |
| Master_Off_Line*New_Ethnicity_Breakdown | 21 5   | 0.0000000  | 0.00000000 |
| .                                       | .      |            |            |

INTERACTION WITH INCOME

Tests of Model Effects

| Effect                               | Num DF | F Value | Pr > F |
|--------------------------------------|--------|---------|--------|
| Model                                | 88     | 2.48    | <.0001 |
| Master_Off_Line                      | 9      | 3.44    | 0.0003 |
| Master_Off_Line*New_Income_Breakdown | 54     | 0.97    | 0.5269 |

Estimated Regression Coefficients

| Parameter          | Estimate                                  | Standard Error | t Value    | Pr >  t |  |
|--------------------|-------------------------------------------|----------------|------------|---------|--|
| Master_Off_Line 12 | -0.0365736                                | 0.12609133     | -0.29      | 0.7718  |  |
| Master_Off_Line 13 | -0.0624669                                | 0.13684495     | -0.46      | 0.6481  |  |
| Master_Off_Line 14 | 0.1033827                                 | 0.14765285     | 0.70       | 0.4838  |  |
| Master_Off_Line 15 | -0.2104193                                | 0.19639566     | -1.07      | 0.2840  |  |
| Master_Off_Line 16 | -0.0447019                                | 0.14658795     | -0.30      | 0.7604  |  |
| Master_Off_Line 17 | 0.2308633                                 | 0.15841037     | 1.46       | 0.1450  |  |
| Master_Off_Line 18 | 0.1144185                                 | 0.15274166     | 0.75       | 0.4538  |  |
| Master_Off_Line 19 | 0.2855622                                 | 0.15350258     | 1.86       | 0.0629  |  |
| Master_Off_Line 20 | -0.2400246                                | 0.25619171     | -0.94      | 0.3488  |  |
| Master_Off_Line 21 | 0.0000000                                 | 0.00000000     | .          | .       |  |
| 1.14 0.2559        | Master_Off_Line*New_Income_Breakdown 12 1 | -0.2756443     | 0.24261434 | -       |  |
| 1.54 0.1241        | Master_Off_Line*New_Income_Breakdown 12 2 | 0.1749478      | 0.11377206 |         |  |
| 0.03 0.9795        | Master_Off_Line*New_Income_Breakdown 12 3 | -0.0027824     | 0.10845919 | -       |  |
| 2.02 0.0433        | Master_Off_Line*New_Income_Breakdown 12 4 | -0.2491687     | 0.12331177 | -       |  |
| 0.17 0.8676        | Master_Off_Line*New_Income_Breakdown 12 5 | 0.0141932      | 0.08516321 |         |  |
| 1.33 0.1825        | Master_Off_Line*New_Income_Breakdown 12 6 | -0.1273380     | 0.09551189 | -       |  |
| .                  | Master_Off_Line*New_Income_Breakdown 12 7 | 0.0000000      | 0.00000000 |         |  |
| 0.96 0.3369        | Master_Off_Line*New_Income_Breakdown 13 1 | -0.1652217     | 0.17205831 | -       |  |
| 0.05 0.9640        | Master_Off_Line*New_Income_Breakdown 13 2 | 0.0062907      | 0.13921947 |         |  |
| 0.02 0.9863        | Master_Off_Line*New_Income_Breakdown 13 3 | -0.0020626     | 0.12035184 | -       |  |
| 1.45 0.1466        | Master_Off_Line*New_Income_Breakdown 13 4 | 0.1522189      | 0.10485198 |         |  |
| 0.56 0.5773        | Master_Off_Line*New_Income_Breakdown 13 5 | 0.0562327      | 0.10088640 |         |  |
| 0.78 0.4378        | Master_Off_Line*New_Income_Breakdown 13 6 | 0.0810174      | 0.10440787 |         |  |
| .                  | Master_Off_Line*New_Income_Breakdown 13 7 | 0.0000000      | 0.00000000 |         |  |
| 1.75 0.0794        | Master_Off_Line*New_Income_Breakdown 14 1 | -0.3495820     | 0.19924416 | -       |  |
| 0.58 0.5601        | Master_Off_Line*New_Income_Breakdown 14 2 | -0.1003821     | 0.17227085 | -       |  |

|      |        |                                           |            |            |   |
|------|--------|-------------------------------------------|------------|------------|---|
| 0.57 | 0.5681 | Master_Off_Line*New_Income_Breakdown 14 3 | -0.0855269 | 0.14980340 | - |
| 0.32 | 0.7486 | Master_Off_Line*New_Income_Breakdown 14 4 | -0.0354820 | 0.11070664 | - |
| 0.30 | 0.7643 | Master_Off_Line*New_Income_Breakdown 14 5 | 0.0336866  | 0.11232880 |   |
| 0.20 | 0.8396 | Master_Off_Line*New_Income_Breakdown 14 6 | -0.0234768 | 0.11598391 | - |
| .    | .      | Master_Off_Line*New_Income_Breakdown 14 7 | 0.0000000  | 0.00000000 |   |
| 0.18 | 0.8603 | Master_Off_Line*New_Income_Breakdown 15 1 | -0.0556819 | 0.31640552 | - |
| 1.15 | 0.2514 | Master_Off_Line*New_Income_Breakdown 15 2 | 0.2498618  | 0.21782576 |   |
| 1.11 | 0.2664 | Master_Off_Line*New_Income_Breakdown 15 3 | 0.2421754  | 0.21789535 |   |
| 1.19 | 0.2337 | Master_Off_Line*New_Income_Breakdown 15 4 | 0.2363118  | 0.19841928 |   |
| 1.34 | 0.1801 | Master_Off_Line*New_Income_Breakdown 15 5 | 0.2592119  | 0.19334721 |   |
| 1.10 | 0.2703 | Master_Off_Line*New_Income_Breakdown 15 6 | 0.2264857  | 0.20544389 |   |
| .    | .      | Master_Off_Line*New_Income_Breakdown 15 7 | 0.0000000  | 0.00000000 |   |
| 1.32 | 0.1871 | Master_Off_Line*New_Income_Breakdown 16 1 | -0.3725652 | 0.28237580 | - |
| 1.08 | 0.2804 | Master_Off_Line*New_Income_Breakdown 16 2 | -0.2395698 | 0.22192560 | - |
| 0.84 | 0.4007 | Master_Off_Line*New_Income_Breakdown 16 3 | -0.1648437 | 0.19613561 | - |
| 0.51 | 0.6124 | Master_Off_Line*New_Income_Breakdown 16 4 | 0.0747774  | 0.14760104 |   |
| 0.19 | 0.8468 | Master_Off_Line*New_Income_Breakdown 16 5 | 0.0260280  | 0.13474274 |   |
| 0.26 | 0.7959 | Master_Off_Line*New_Income_Breakdown 16 6 | -0.0394826 | 0.15264646 | - |
| .    | .      | Master_Off_Line*New_Income_Breakdown 16 7 | 0.0000000  | 0.00000000 |   |
| 1.78 | 0.0752 | Master_Off_Line*New_Income_Breakdown 17 1 | -0.6398544 | 0.35954794 | - |
| 1.51 | 0.1309 | Master_Off_Line*New_Income_Breakdown 17 2 | -0.3398954 | 0.22498521 | - |
| 1.95 | 0.0507 | Master_Off_Line*New_Income_Breakdown 17 3 | -0.3636899 | 0.18609906 | - |
| 1.06 | 0.2891 | Master_Off_Line*New_Income_Breakdown 17 4 | -0.1676177 | 0.15811809 | - |

|      |        |                                           |            |            |   |
|------|--------|-------------------------------------------|------------|------------|---|
| 1.48 | 0.1400 | Master_Off_Line*New_Income_Breakdown 17 5 | -0.2524054 | 0.17100167 | - |
| 0.03 | 0.9742 | Master_Off_Line*New_Income_Breakdown 17 6 | -0.0046349 | 0.14329699 | - |
| .    | .      | Master_Off_Line*New_Income_Breakdown 17 7 | 0.0000000  | 0.00000000 | . |
| 0.33 | 0.7441 | Master_Off_Line*New_Income_Breakdown 18 1 | 0.0568336  | 0.17409296 | . |
| 0.55 | 0.5819 | Master_Off_Line*New_Income_Breakdown 18 2 | 0.0901533  | 0.16372543 | . |
| 1.05 | 0.2936 | Master_Off_Line*New_Income_Breakdown 18 3 | -0.1623809 | 0.15459968 | - |
| 0.44 | 0.6585 | Master_Off_Line*New_Income_Breakdown 18 4 | -0.0614424 | 0.13899020 | - |
| 0.73 | 0.4676 | Master_Off_Line*New_Income_Breakdown 18 5 | -0.1094027 | 0.15062249 | - |
| 0.08 | 0.9376 | Master_Off_Line*New_Income_Breakdown 18 6 | 0.0113411  | 0.14494185 | . |
| .    | .      | Master_Off_Line*New_Income_Breakdown 18 7 | 0.0000000  | 0.00000000 | . |
| 0.95 | 0.3436 | Master_Off_Line*New_Income_Breakdown 19 1 | -0.2205864 | 0.23289135 | - |
| 1.67 | 0.0949 | Master_Off_Line*New_Income_Breakdown 19 2 | -0.2991587 | 0.17908530 | - |
| 1.60 | 0.1094 | Master_Off_Line*New_Income_Breakdown 19 3 | -0.2788111 | 0.17416747 | - |
| 1.65 | 0.0980 | Master_Off_Line*New_Income_Breakdown 19 4 | -0.2390542 | 0.14445601 | - |
| 0.70 | 0.4861 | Master_Off_Line*New_Income_Breakdown 19 5 | -0.1009532 | 0.14493386 | - |
| 0.25 | 0.8040 | Master_Off_Line*New_Income_Breakdown 19 6 | -0.0389824 | 0.15706624 | - |
| .    | .      | Master_Off_Line*New_Income_Breakdown 19 7 | 0.0000000  | 0.00000000 | . |
| 0.89 | 0.3726 | Master_Off_Line*New_Income_Breakdown 20 1 | -0.6101461 | 0.68430793 | - |
| 1.34 | 0.1795 | Master_Off_Line*New_Income_Breakdown 20 2 | -0.6260490 | 0.46634228 | - |
| 0.60 | 0.5463 | Master_Off_Line*New_Income_Breakdown 20 3 | 0.2097671  | 0.34768544 | . |
| 0.21 | 0.8310 | Master_Off_Line*New_Income_Breakdown 20 4 | -0.0685853 | 0.32144316 | - |
| 1.52 | 0.1296 | Master_Off_Line*New_Income_Breakdown 20 5 | 0.4279924  | 0.28235597 | . |
| 0.50 | 0.6152 | Master_Off_Line*New_Income_Breakdown 20 6 | -0.1536795 | 0.30574652 | - |

|        |                                      |      |            |            |   |
|--------|--------------------------------------|------|------------|------------|---|
|        | Master_Off_Line*New_Income_Breakdown | 20 7 | 0.0000000  | 0.00000000 |   |
| 0.83   | Master_Off_Line*New_Income_Breakdown | 21 1 | -0.1917126 | 0.23201753 | - |
| 0.4087 |                                      |      |            |            |   |
| 1.26   | Master_Off_Line*New_Income_Breakdown | 21 2 | -0.2824087 | 0.22395427 | - |
| 0.2073 |                                      |      |            |            |   |
| 0.21   | Master_Off_Line*New_Income_Breakdown | 21 3 | 0.0417162  | 0.19780964 |   |
| 0.8330 |                                      |      |            |            |   |
| 0.40   | Master_Off_Line*New_Income_Breakdown | 21 4 | -0.0626492 | 0.15804336 | - |
| 0.6918 |                                      |      |            |            |   |
| 0.31   | Master_Off_Line*New_Income_Breakdown | 21 5 | -0.0474117 | 0.15543874 | - |
| 0.7604 |                                      |      |            |            |   |
| 0.15   | Master_Off_Line*New_Income_Breakdown | 21 6 | 0.0292678  | 0.19010937 |   |
| 0.8777 |                                      |      |            |            |   |
|        | Master_Off_Line*New_Income_Breakdown | 21 7 | 0.0000000  | 0.00000000 |   |

## INTERACTION WITH EDUCATION

## Tests of Model Effects

| Effect                                  | Num DF | F Value | Pr > F |
|-----------------------------------------|--------|---------|--------|
| Model                                   | 61     | 3.69    | <.0001 |
| Master_Off_Line                         | 9      | 3.25    | 0.0006 |
| Master_Off_Line*New_Education_Breakdown | 27     | 1.18    | 0.2418 |

## Estimated Regression Coefficients

| Parameter                                    | Standard Estimate | Error      | t Value | Pr >  t |
|----------------------------------------------|-------------------|------------|---------|---------|
| Master_Off_Line 12                           | -0.2365695        | 0.12575137 | -1.88   | 0.0600  |
| Master_Off_Line 13                           | -0.1386689        | 0.13724884 | -1.01   | 0.3124  |
| Master_Off_Line 14                           | 0.1047933         | 0.11319918 | 0.93    | 0.3546  |
| Master_Off_Line 15                           | -0.2726417        | 0.19314848 | -1.41   | 0.1581  |
| Master_Off_Line 16                           | -0.0990039        | 0.12670325 | -0.78   | 0.4346  |
| Master_Off_Line 17                           | 0.1352507         | 0.13309536 | 1.02    | 0.3096  |
| Master_Off_Line 18                           | 0.0060898         | 0.12364223 | 0.05    | 0.9607  |
| Master_Off_Line 19                           | 0.1355222         | 0.15707442 | 0.86    | 0.3883  |
| Master_Off_Line 20                           | -0.3070641        | 0.22493626 | -1.37   | 0.1722  |
| Master_Off_Line 21                           | 0.0000000         | 0.00000000 | .       | .       |
| Master_Off_Line*New_Education_Breakdown 12 1 | -0.0060321        | 0.11343565 |         |         |
| -0.05                                        | 0.9576            |            |         |         |
| 1.07                                         | 0.2855            |            |         |         |
| Master_Off_Line*New_Education_Breakdown 12 2 | 0.1204964         | 0.11281090 |         |         |



|                                         |        |            |            |
|-----------------------------------------|--------|------------|------------|
| Master_Off_Line*New_Education_Breakdown | 12 3   | -0.0015430 | 0.09154438 |
| -0.02                                   | 0.9866 |            |            |
| Master_Off_Line*New_Education_Breakdown | 12 4   | 0.0000000  | 0.00000000 |
| .                                       | .      |            |            |
| Master_Off_Line*New_Education_Breakdown | 13 1   | -0.0871635 | 0.12232373 |
| -0.71                                   | 0.4761 |            |            |
| Master_Off_Line*New_Education_Breakdown | 13 2   | 0.0043060  | 0.11691967 |
| 0.04                                    | 0.9706 |            |            |
| Master_Off_Line*New_Education_Breakdown | 13 3   | 0.0327610  | 0.10424573 |
| 0.31                                    | 0.7533 |            |            |
| Master_Off_Line*New_Education_Breakdown | 13 4   | 0.0000000  | 0.00000000 |
| .                                       | .      |            |            |
| Master_Off_Line*New_Education_Breakdown | 14 1   | -0.2548477 | 0.11488431 |
| -2.22                                   | 0.0266 |            |            |
| Master_Off_Line*New_Education_Breakdown | 14 2   | -0.3469186 | 0.17901220 |
| -1.94                                   | 0.0527 |            |            |
| Master_Off_Line*New_Education_Breakdown | 14 3   | -0.1242198 | 0.06897453 |
| -1.80                                   | 0.0717 |            |            |
| Master_Off_Line*New_Education_Breakdown | 14 4   | 0.0000000  | 0.00000000 |
| .                                       | .      |            |            |
| Master_Off_Line*New_Education_Breakdown | 15 1   | 0.2655378  | 0.19308322 |
| 1.38                                    | 0.1691 |            |            |
| Master_Off_Line*New_Education_Breakdown | 15 2   | -0.0133397 | 0.22122108 |
| -0.06                                   | 0.9519 |            |            |
| Master_Off_Line*New_Education_Breakdown | 15 3   | 0.0578712  | 0.18927760 |
| 0.31                                    | 0.7598 |            |            |
| Master_Off_Line*New_Education_Breakdown | 15 4   | 0.0000000  | 0.00000000 |
| .                                       | .      |            |            |
| Master_Off_Line*New_Education_Breakdown | 16 1   | -0.1410354 | 0.14419380 |
| -0.98                                   | 0.3280 |            |            |
| Master_Off_Line*New_Education_Breakdown | 16 2   | -0.2017903 | 0.13921735 |
| -1.45                                   | 0.1472 |            |            |
| Master_Off_Line*New_Education_Breakdown | 16 3   | -0.0653325 | 0.10693806 |
| -0.61                                   | 0.5413 |            |            |
| Master_Off_Line*New_Education_Breakdown | 16 4   | 0.0000000  | 0.00000000 |
| .                                       | .      |            |            |
| Master_Off_Line*New_Education_Breakdown | 17 1   | -0.3637783 | 0.18938682 |
| -1.92                                   | 0.0548 |            |            |
| Master_Off_Line*New_Education_Breakdown | 17 2   | -0.0284426 | 0.14695760 |
| -0.19                                   | 0.8465 |            |            |
| Master_Off_Line*New_Education_Breakdown | 17 3   | -0.2603010 | 0.11609816 |
| -2.24                                   | 0.0250 |            |            |
| Master_Off_Line*New_Education_Breakdown | 17 4   | 0.0000000  | 0.00000000 |
| .                                       | .      |            |            |
| Master_Off_Line*New_Education_Breakdown | 18 1   | 0.0316213  | 0.11762263 |
| 0.27                                    | 0.7881 |            |            |

|                                         |        |            |            |
|-----------------------------------------|--------|------------|------------|
| Master_Off_Line*New_Education_Breakdown | 18 2   | -0.2732568 | 0.17693512 |
| -1.54                                   | 0.1225 |            |            |
| Master_Off_Line*New_Education_Breakdown | 18 3   | -0.0390614 | 0.10038797 |
| -0.39                                   | 0.6972 |            |            |
| Master_Off_Line*New_Education_Breakdown | 18 4   | 0.0000000  | 0.00000000 |
| .                                       | .      |            |            |
| Master_Off_Line*New_Education_Breakdown | 19 1   | -0.1837927 | 0.16445453 |
| -1.12                                   | 0.2638 |            |            |
| Master_Off_Line*New_Education_Breakdown | 19 2   | -0.1553677 | 0.15746059 |
| -0.99                                   | 0.3238 |            |            |
| Master_Off_Line*New_Education_Breakdown | 19 3   | -0.0268201 | 0.14067054 |
| -0.19                                   | 0.8488 |            |            |
| Master_Off_Line*New_Education_Breakdown | 19 4   | 0.0000000  | 0.00000000 |
| .                                       | .      |            |            |
| Master_Off_Line*New_Education_Breakdown | 20 1   | 0.1555041  | 0.30151724 |
| 0.52                                    | 0.6060 |            |            |
| Master_Off_Line*New_Education_Breakdown | 20 2   | -0.1069430 | 0.31174568 |
| -0.34                                   | 0.7316 |            |            |
| Master_Off_Line*New_Education_Breakdown | 20 3   | -0.0798863 | 0.26847128 |
| -0.30                                   | 0.7660 |            |            |
| Master_Off_Line*New_Education_Breakdown | 20 4   | 0.0000000  | 0.00000000 |
| .                                       | .      |            |            |
| Master_Off_Line*New_Education_Breakdown | 21 1   | -0.0834606 | 0.14779956 |
| -0.56                                   | 0.5723 |            |            |
| Master_Off_Line*New_Education_Breakdown | 21 2   | -0.1584686 | 0.14848092 |
| -1.07                                   | 0.2859 |            |            |
| Master_Off_Line*New_Education_Breakdown | 21 3   | -0.3075746 | 0.12866018 |
| -2.39                                   | 0.0168 |            |            |
| Master_Off_Line*New_Education_Breakdown | 21 4   | 0.0000000  | 0.00000000 |
| .                                       | .      |            |            |

## INTERACTION WITH RELIGION

### Tests of Model Effects

| Effect                                 | Num DF | F Value | Pr > F |
|----------------------------------------|--------|---------|--------|
| Model                                  | 84     | 3.44    | <.0001 |
| Master_Off_Line                        | 9      | 2.85    | 0.0024 |
| Master_Off_Line*New_Religion_Breakdown | 54     | 1.63    | 0.0024 |

### Estimated Regression Coefficients

| Parameter          | Estimate   | Standard Error | t Value | Pr >  t |
|--------------------|------------|----------------|---------|---------|
| Master_Off_Line 12 | -0.1149697 | 0.24313054     | -0.47   | 0.6363  |

|                                             |            |            |       |        |
|---------------------------------------------|------------|------------|-------|--------|
| Master_Off_Line 13                          | 0.1168131  | 0.23602007 | 0.49  | 0.6207 |
| Master_Off_Line 14                          | 0.1248622  | 0.24564097 | 0.51  | 0.6112 |
| Master_Off_Line 15                          | -0.2464066 | 0.25832197 | -0.95 | 0.3402 |
| Master_Off_Line 16                          | -0.1211062 | 0.24962985 | -0.49 | 0.6276 |
| Master_Off_Line 17                          | 0.3315620  | 0.23111843 | 1.43  | 0.1514 |
| Master_Off_Line 18                          | 0.2182547  | 0.25296926 | 0.86  | 0.3883 |
| Master_Off_Line 19                          | -0.1605239 | 0.29462901 | -0.54 | 0.5859 |
| Master_Off_Line 20                          | -0.2042473 | 0.31084233 | -0.66 | 0.5111 |
| Master_Off_Line 21                          | 0.0000000  | 0.00000000 | .     | .      |
| Master_Off_Line*New_Religion_Breakdown 12 1 | 0.0342259  | 0.15112956 |       |        |
| 0.23 0.8208                                 |            |            |       |        |
| Master_Off_Line*New_Religion_Breakdown 12 2 | 0.1232851  | 0.14264332 |       |        |
| 0.86 0.3874                                 |            |            |       |        |
| Master_Off_Line*New_Religion_Breakdown 12 3 | 0.1201233  | 0.32279644 |       |        |
| 0.37 0.7098                                 |            |            |       |        |
| Master_Off_Line*New_Religion_Breakdown 12 4 | 0.0949525  | 0.25461746 |       |        |
| 0.37 0.7092                                 |            |            |       |        |
| Master_Off_Line*New_Religion_Breakdown 12 5 | 0.2440177  | 0.14852293 |       |        |
| 1.64 0.1004                                 |            |            |       |        |
| Master_Off_Line*New_Religion_Breakdown 12 6 | 0.1526786  | 0.15798303 |       |        |
| 0.97 0.3339                                 |            |            |       |        |
| Master_Off_Line*New_Religion_Breakdown 12 7 | 0.0000000  | 0.00000000 |       |        |
| .                                           |            |            |       |        |
| Master_Off_Line*New_Religion_Breakdown 13 1 | 0.0443706  | 0.13221284 |       |        |
| 0.34 0.7372                                 |            |            |       |        |
| Master_Off_Line*New_Religion_Breakdown 13 2 | 0.0104699  | 0.12827352 |       |        |
| 0.08 0.9349                                 |            |            |       |        |
| Master_Off_Line*New_Religion_Breakdown 13 3 | -0.1030218 | 0.29665445 |       |        |
| -0.35 0.7284                                |            |            |       |        |
| Master_Off_Line*New_Religion_Breakdown 13 4 | 0.3859048  | 0.16819862 |       |        |
| 2.29 0.0218                                 |            |            |       |        |
| Master_Off_Line*New_Religion_Breakdown 13 5 | -0.2180487 | 0.15071522 |       |        |
| -1.45 0.1480                                |            |            |       |        |
| Master_Off_Line*New_Religion_Breakdown 13 6 | -0.2848614 | 0.16178783 |       |        |
| -1.76 0.0783                                |            |            |       |        |
| Master_Off_Line*New_Religion_Breakdown 13 7 | 0.0000000  | 0.00000000 |       |        |
| .                                           |            |            |       |        |
| Master_Off_Line*New_Religion_Breakdown 14 1 | 0.1299709  | 0.14794551 |       |        |
| 0.88 0.3797                                 |            |            |       |        |
| Master_Off_Line*New_Religion_Breakdown 14 2 | 0.0134641  | 0.14606927 |       |        |
| 0.09 0.9266                                 |            |            |       |        |
| Master_Off_Line*New_Religion_Breakdown 14 3 | 0.0819080  | 0.21358166 |       |        |
| 0.38 0.7014                                 |            |            |       |        |
| Master_Off_Line*New_Religion_Breakdown 14 4 | 0.3531978  | 0.16049161 |       |        |
| 2.20 0.0278                                 |            |            |       |        |

|                                        |        |            |            |
|----------------------------------------|--------|------------|------------|
| Master_Off_Line*New_Religion_Breakdown | 14 5   | -0.1218507 | 0.20717075 |
| -0.59                                  | 0.5564 |            |            |
| Master_Off_Line*New_Religion_Breakdown | 14 6   | 0.0558595  | 0.15814039 |
| 0.35                                   | 0.7239 |            |            |
| Master_Off_Line*New_Religion_Breakdown | 14 7   | 0.0000000  | 0.00000000 |
| .                                      | .      |            |            |
| Master_Off_Line*New_Religion_Breakdown | 15 1   | 0.1646191  | 0.19122998 |
| 0.86                                   | 0.3893 |            |            |
| Master_Off_Line*New_Religion_Breakdown | 15 2   | 0.4289850  | 0.19514304 |
| 2.20                                   | 0.0279 |            |            |
| Master_Off_Line*New_Religion_Breakdown | 15 3   | 0.8423948  | 0.40340894 |
| 2.09                                   | 0.0368 |            |            |
| Master_Off_Line*New_Religion_Breakdown | 15 4   | -0.0247093 | 0.32559505 |
| -0.08                                  | 0.9395 |            |            |
| Master_Off_Line*New_Religion_Breakdown | 15 5   | 0.5035482  | 0.18668408 |
| 2.70                                   | 0.0070 |            |            |
| Master_Off_Line*New_Religion_Breakdown | 15 6   | 0.0556089  | 0.25459708 |
| 0.22                                   | 0.8271 |            |            |
| Master_Off_Line*New_Religion_Breakdown | 15 7   | 0.0000000  | 0.00000000 |
| .                                      | .      |            |            |
| Master_Off_Line*New_Religion_Breakdown | 16 1   | 0.0230824  | 0.17317745 |
| 0.13                                   | 0.8940 |            |            |
| Master_Off_Line*New_Religion_Breakdown | 16 2   | 0.1652762  | 0.16906764 |
| 0.98                                   | 0.3283 |            |            |
| Master_Off_Line*New_Religion_Breakdown | 16 3   | -0.1601053 | 0.33041002 |
| -0.48                                  | 0.6280 |            |            |
| Master_Off_Line*New_Religion_Breakdown | 16 4   | 0.8595630  | 0.40848430 |
| 2.10                                   | 0.0354 |            |            |
| Master_Off_Line*New_Religion_Breakdown | 16 5   | 0.3576039  | 0.17065989 |
| 2.10                                   | 0.0362 |            |            |
| Master_Off_Line*New_Religion_Breakdown | 16 6   | 0.0815413  | 0.20922714 |
| 0.39                                   | 0.6967 |            |            |
| Master_Off_Line*New_Religion_Breakdown | 16 7   | 0.0000000  | 0.00000000 |
| .                                      | .      |            |            |
| Master_Off_Line*New_Religion_Breakdown | 17 1   | -0.2326108 | 0.22242426 |
| -1.05                                  | 0.2957 |            |            |
| Master_Off_Line*New_Religion_Breakdown | 17 2   | -0.1948815 | 0.12794735 |
| -1.52                                  | 0.1278 |            |            |
| Master_Off_Line*New_Religion_Breakdown | 17 3   | 0.2010558  | 0.23925311 |
| 0.84                                   | 0.4007 |            |            |
| Master_Off_Line*New_Religion_Breakdown | 17 4   | 0.0798239  | 0.17908865 |
| 0.45                                   | 0.6558 |            |            |
| Master_Off_Line*New_Religion_Breakdown | 17 5   | -1.3352246 | 0.40856632 |
| -3.27                                  | 0.0011 |            |            |
| Master_Off_Line*New_Religion_Breakdown | 17 6   | -0.0895219 | 0.48796140 |
| -0.18                                  | 0.8544 |            |            |

|        |                                             |            |            |
|--------|---------------------------------------------|------------|------------|
|        | Master_Off_Line*New_Religion_Breakdown 17 7 | 0.0000000  | 0.00000000 |
| .      | .                                           |            |            |
| 0.08   | Master_Off_Line*New_Religion_Breakdown 18 1 | 0.0139752  | 0.16544301 |
| 0.9327 |                                             |            |            |
| -0.61  | Master_Off_Line*New_Religion_Breakdown 18 2 | -0.1057840 | 0.17285179 |
| 0.5406 |                                             |            |            |
| 0.06   | Master_Off_Line*New_Religion_Breakdown 18 3 | 0.0149432  | 0.23179011 |
| 0.9486 |                                             |            |            |
| 1.27   | Master_Off_Line*New_Religion_Breakdown 18 4 | 0.2341742  | 0.18395260 |
| 0.2030 |                                             |            |            |
| -0.57  | Master_Off_Line*New_Religion_Breakdown 18 5 | -0.1144335 | 0.20211959 |
| 0.5713 |                                             |            |            |
| -0.54  | Master_Off_Line*New_Religion_Breakdown 18 6 | -0.0923297 | 0.17212936 |
| 0.5917 |                                             |            |            |
|        | Master_Off_Line*New_Religion_Breakdown 18 7 | 0.0000000  | 0.00000000 |
| .      | .                                           |            |            |
| 2.61   | Master_Off_Line*New_Religion_Breakdown 19 1 | 0.6014225  | 0.23046361 |
| 0.0091 |                                             |            |            |
| 1.70   | Master_Off_Line*New_Religion_Breakdown 19 2 | 0.3832930  | 0.22554391 |
| 0.0893 |                                             |            |            |
| 2.97   | Master_Off_Line*New_Religion_Breakdown 19 3 | 0.7904674  | 0.26597855 |
| 0.0030 |                                             |            |            |
| 2.50   | Master_Off_Line*New_Religion_Breakdown 19 4 | 0.7458698  | 0.29867468 |
| 0.0125 |                                             |            |            |
| 1.56   | Master_Off_Line*New_Religion_Breakdown 19 5 | 0.3700272  | 0.23658690 |
| 0.1178 |                                             |            |            |
| 1.71   | Master_Off_Line*New_Religion_Breakdown 19 6 | 0.4405072  | 0.25713411 |
| 0.0867 |                                             |            |            |
|        | Master_Off_Line*New_Religion_Breakdown 19 7 | 0.0000000  | 0.00000000 |
| .      | .                                           |            |            |
| -0.77  | Master_Off_Line*New_Religion_Breakdown 20 1 | -0.2524926 | 0.32850939 |
| 0.4421 |                                             |            |            |
| 0.89   | Master_Off_Line*New_Religion_Breakdown 20 2 | 0.2368853  | 0.26744058 |
| 0.3758 |                                             |            |            |
| -0.10  | Master_Off_Line*New_Religion_Breakdown 20 3 | -0.0725408 | 0.70938621 |
| 0.9186 |                                             |            |            |
| 0.43   | Master_Off_Line*New_Religion_Breakdown 20 4 | 0.2285217  | 0.53382948 |
| 0.6686 |                                             |            |            |
| 1.13   | Master_Off_Line*New_Religion_Breakdown 20 5 | 0.3747836  | 0.33113083 |
| 0.2577 |                                             |            |            |
| 1.54   | Master_Off_Line*New_Religion_Breakdown 20 6 | 0.4720013  | 0.30552191 |
| 0.1224 |                                             |            |            |
|        | Master_Off_Line*New_Religion_Breakdown 20 7 | 0.0000000  | 0.00000000 |
| .      | .                                           |            |            |
| 0.32   | Master_Off_Line*New_Religion_Breakdown 21 1 | 0.0741621  | 0.23518916 |
| 0.7525 |                                             |            |            |

|       |        |                                        |      |            |            |
|-------|--------|----------------------------------------|------|------------|------------|
| 0.00  | 0.9980 | Master_Off_Line*New_Religion_Breakdown | 21 2 | 0.0005471  | 0.22086115 |
| 0.46  | 0.6433 | Master_Off_Line*New_Religion_Breakdown | 21 3 | 0.1318190  | 0.28465380 |
| 0.95  | 0.3430 | Master_Off_Line*New_Religion_Breakdown | 21 4 | 0.3168533  | 0.33413395 |
| -0.18 | 0.8584 | Master_Off_Line*New_Religion_Breakdown | 21 5 | -0.0448685 | 0.25154017 |
| 0.57  | 0.5667 | Master_Off_Line*New_Religion_Breakdown | 21 6 | 0.1374841  | 0.23995559 |
| .     | .      | Master_Off_Line*New_Religion_Breakdown | 21 7 | 0.0000000  | 0.00000000 |

## INTERACTION WITH EMPLOYMENT

## Tests of Model Effects

| Effect                  | Num DF | F Value | Pr > F |
|-------------------------|--------|---------|--------|
| Model                   | 61     | 3.54    | <.0001 |
| Master_Off_Line         | 9      | 1.58    | 0.1152 |
| Master_Off_Line*working | 30     | 2.08    | 0.0005 |

## Estimated Regression Coefficients

| Parameter          | Estimate                     | Standard Error | t Value    | Pr >  t |
|--------------------|------------------------------|----------------|------------|---------|
| Master_Off_Line 12 | 0.0328169                    | 0.11456916     | 0.29       | 0.7745  |
| Master_Off_Line 13 | -0.0149261                   | 0.11686174     | -0.13      | 0.8984  |
| Master_Off_Line 14 | 0.1135624                    | 0.11926834     | 0.95       | 0.3410  |
| Master_Off_Line 15 | 0.0964205                    | 0.12744973     | 0.76       | 0.4493  |
| Master_Off_Line 16 | -0.0521978                   | 0.14317415     | -0.36      | 0.7154  |
| Master_Off_Line 17 | 0.2339614                    | 0.12541818     | 1.87       | 0.0621  |
| Master_Off_Line 18 | 0.1894347                    | 0.12310615     | 1.54       | 0.1239  |
| Master_Off_Line 19 | 0.0474064                    | 0.13905430     | 0.34       | 0.7332  |
| Master_Off_Line 20 | -0.3342531                   | 0.23754464     | -1.41      | 0.1594  |
| Master_Off_Line 21 | 0.0000000                    | 0.00000000     | .          | .       |
| 0.1074             | Master_Off_Line*working 12 0 | -0.2364748     | 0.14686760 | -1.61   |
| 0.1083             | Master_Off_Line*working 12 1 | -0.1120066     | 0.06974726 | -1.61   |
| 0.3557             | Master_Off_Line*working 12 2 | 0.1681700      | 0.18205941 | 0.92    |
| 0.5841             | Master_Off_Line*working 12 3 | 0.0000000      | 0.00000000 | .       |
|                    | Master_Off_Line*working 13 0 | 0.0963326      | 0.17599234 | 0.55    |

|        |                              |            |            |       |
|--------|------------------------------|------------|------------|-------|
| 0.6923 | Master_Off_Line*working 13 1 | 0.0291391  | 0.07363985 | 0.40  |
| 0.0150 | Master_Off_Line*working 13 2 | 0.4052920  | 0.16659111 | 2.43  |
|        | Master_Off_Line*working 13 3 | 0.0000000  | 0.00000000 | .     |
| 0.3980 | Master_Off_Line*working 14 0 | 0.1205034  | 0.14257363 | 0.85  |
| 0.9551 | Master_Off_Line*working 14 1 | -0.0044730 | 0.07940931 | -0.06 |
| 0.5333 | Master_Off_Line*working 14 2 | 0.2294669  | 0.36834423 | 0.62  |
|        | Master_Off_Line*working 14 3 | 0.0000000  | 0.00000000 | .     |
| 0.4463 | Master_Off_Line*working 15 0 | 0.1449202  | 0.19026213 | 0.76  |
| 0.1826 | Master_Off_Line*working 15 1 | -0.1526407 | 0.11450820 | -1.33 |
| 0.9036 | Master_Off_Line*working 15 2 | -0.0501299 | 0.41390181 | -0.12 |
|        | Master_Off_Line*working 15 3 | 0.0000000  | 0.00000000 | .     |
| 0.6521 | Master_Off_Line*working 16 0 | -0.0988299 | 0.21922353 | -0.45 |
| 0.8037 | Master_Off_Line*working 16 1 | 0.0295243  | 0.11875414 | 0.25  |
| 0.4298 | Master_Off_Line*working 16 2 | 0.1780714  | 0.22551605 | 0.79  |
|        | Master_Off_Line*working 16 3 | 0.0000000  | 0.00000000 | .     |
| 0.5590 | Master_Off_Line*working 17 0 | -0.1300239 | 0.22251294 | -0.58 |
| 0.0267 | Master_Off_Line*working 17 1 | -0.2466438 | 0.11128719 | -2.22 |
| 0.1884 | Master_Off_Line*working 17 2 | 0.2587040  | 0.19667105 | 1.32  |
|        | Master_Off_Line*working 17 3 | 0.0000000  | 0.00000000 | .     |
| 0.4572 | Master_Off_Line*working 18 0 | -0.1637925 | 0.22028397 | -0.74 |
| 0.2705 | Master_Off_Line*working 18 1 | -0.1055718 | 0.09580042 | -1.10 |
| 0.1380 | Master_Off_Line*working 18 2 | 0.2242154  | 0.15113745 | 1.48  |
|        | Master_Off_Line*working 18 3 | 0.0000000  | 0.00000000 | .     |
| 0.1494 | Master_Off_Line*working 19 0 | 0.3374193  | 0.23403987 | 1.44  |
| 0.0209 | Master_Off_Line*working 19 1 | 0.2604361  | 0.11277856 | 2.31  |
| 0.6592 | Master_Off_Line*working 19 2 | -0.1091426 | 0.24749952 | -0.44 |

|        |                              |            |            |       |
|--------|------------------------------|------------|------------|-------|
|        | Master_Off_Line*working 19 3 | 0.0000000  | 0.00000000 | . .   |
|        | Master_Off_Line*working 20 0 | 0.9689569  | 0.26554268 | 3.65  |
| 0.0003 |                              |            |            |       |
|        | Master_Off_Line*working 20 1 | 0.1793581  | 0.25602839 | 0.70  |
| 0.4836 |                              |            |            |       |
|        | Master_Off_Line*working 20 2 | 0.7806589  | 0.26261944 | 2.97  |
| 0.0030 |                              |            |            |       |
|        | Master_Off_Line*working 20 3 | 0.0000000  | 0.00000000 | . .   |
|        | Master_Off_Line*working 21 0 | -0.3119311 | 0.27699484 | -1.13 |
| 0.2601 |                              |            |            |       |
|        | Master_Off_Line*working 21 1 | 0.0262233  | 0.12333518 | 0.21  |
| 0.8316 |                              |            |            |       |
|        | Master_Off_Line*working 21 2 | 0.2338795  | 0.17326594 | 1.35  |
| 0.1771 |                              |            |            |       |
|        | Master_Off_Line*working 21 3 | 0.0000000  | 0.00000000 | . .   |
